# Supplementary material for: Mouse Paneth cell antimicrobial function is independent of Nod2
Source: HighWire-hosted journal article supplement (doi:10.1136/gutjnl-2012-304190), 2013-03-19
Supplement: gutjnl-2012-304190supp1.pdf [file gutjnl-2012-304190supp1.pdf]

>Consensus1 len=406 tot-seq=17811  
AGAGTTTGCATCATGGCTCAGGATGAACGCTAGCGGCAGGCTTAACACATGCAAGTCGAGG  
GGCAGCGGGGAGGAAGCTTGCTTTCTCCGCCGGCGACCGGCGCACGGGTGAGTAACACGT  
ATGCAACCTGCCCTGTTCAGGGGACAACCCGCCGAAAGGCGGGCTAAACCCGCGTACAT  
GCCACCGGGGCATCCCGGAGGCAGGAAAGGCTTCGGCCGGACAGGGATGGGCATGCGGCG  
CATTAGGCAGTAGGCGGGGTAACGGCCCACCTAACCGACGATGCGTAGGGGTTCTGAGAG  
GAAGGCCCCCACACTGGTACTGAGACACGGACCAGACTCCTACGGGAGGCAGCAGTGAG  
GAATATTGGTCAATGGTCGGGAGACTGAACCAGCCAAGCCGCGTGA

>Consensus2 len=409 tot-seq=17322  
GAGTTTGATCATGGCTCAGGACGAACGCTGGCGGCGTGCCTAATACATGCAAGTCGAGCG  
AGCTTGCCTAGATGATTTTAGTGCTTGCCTAAATGAACTAGATACAAGCGAGCGGCGG  
ACGGGTGAGTAACACGTGGGTAACCTGCCCAAGAGACTGGGATAACACCTGGAAACAGAT  
GCTAATACCGGATAACAACACTAGACGCATGTCTAGAGTTTCAAAGATGGTTCTGCTATC  
ACTCTTGGATGGACCTGCGGTGCATTAGCTAGTTGGTAAGGTAACGGCTTACCAAGGCAA  
TGATGCATAGCCGAGTTGAGAGACTGATCGGCCACATTGGGACTGAGACACGGCCCAAAC  
TCCTACGGGAGGCAGCAGTAGGGAATCTTCCACAATGGACGAAAGTCTG

>Consensus3 len=296 tot-seq=8966  
AGAGTTTGCATCATGGCTCAGGATGAACGCTAGCGGCAGGCTTAACACATGCAAGTCGAAC  
GGCAGCGGGGATTCACTTCGGTGAATCTGCCGGCGAGTGGCGCACGGGTGAGTAACACGT  
ATGCAACCTGCCTCTGTTCAGGGGTATAACTCTGCGAAAGTAGGGCTAATACCGCGTATAT  
TCCCGGAGGGCATCCTCCGGGGAGGAAAGGTTTCGGCCGGACAGAGATGGGCATGCGGCG  
CATTAGGCAGTTGGCGGGGTAACGGCCCACCAACCGACGATGCGTAGGGGTTCTG

>Consensus4 len=382 tot-seq=6060  
AGAGTTTGCATCATGGCTCAGGATGAACGCTGGCGGCGTGCCTAATACATGCAAGTCGAAC  
GAAACTTCTTTATCACCGAGTGCTTGCCTCACCGATAAAGAGTTGAGTGGCGAACGGGT  
GAGTAACACGTGGGCAACCTGCCAAAAGAGGGGGATAACACTTGGAAACAGGTGCTAAT  
ACCGCATAACCATAGTTACCGCATGGTAACCTATGTAAAAGGTGGCTATGCTACCGCTTTT  
GGATGGGCCCCGCGCGCATTAGCTAGTTGGTGGGGTAAAGGCTTACCAAGGCAATGATGC  
GTAGCCGAACCTGAGAGGTTGATCGGCCACATTGGGACTGAGACACGGCCCAAACCTCTAC  
GGGAGGCAGCAGTAGGGAATCT

>Consensus5 len=446 tot-seq=3878  
AGAGTTTGCATCATGGCTCAGGATGAACGCTGGCGGCATGCCTAATACATGCAAGTCGAAC  
GAGGATCCTTCGGGATCCTAGTGGCGAACGGGTGAGTAACACGTAGGGAACCTGCCCGCG  
CACCGGAATACGCTCTGGAAACGGAGAACAATCCCGATGTACAGGAAGGAGGCATCTT  
CTTTCTGTGAAACATCCTGTAAGGGATGGGGCGCGGATGGACCTGCGGTGCATTAGTTGG  
TTGGCGAGGGTAAAGGCCACCAAGACGATGATGCATAGCCGGCCTGAGAGGGCGGACGG  
CCACATTGGGACTGAGACACGGCCAGACTCCTGCGGGAGGCAGCAGTAGGGAATTTTCG  
TCAATGGGCGCAAGCCTGAACGAGCGATGCCGCGTGAAGGAGGCCTTCGTTTTTTAA  
AGCTCTGTTGCGGGGGAAAAAGGACG

>Consensus6 len=466 tot-seq=3844  
AGAGTTTGCATCCTGGCTCAGGATGAACGCTAGCGACAGGCTTAACACATGCAAGTCGAGG  
GGCAGCGGGGAGGTAGCAATACTTCCGCCGGCGACCGGCGCACGGGTGAGTAACACGTAT  
GGAACCTGCCCGTAGCAGGGGGATAAGCGGAAGAAATTCGGTCTAATACCGCGTAATAAC  
TCCGAGAGGCATCTCATGGAGTTTAAAGGGTAACACCGGCTACGGATGGCCATGCGGCGC  
ATTAGCTAGTTGGCGGGGTAACGGCCCACCAAGGCGACGATGCGTAGGGGTTCTGAGAGG  
AAGGTCCCCCACACTGGTACTGAGACACGGACCAGACTCCTACGGGAGGCAGCAGTGAG  
GAATATTGGTCAATGGGCGGAGCCTGAACCAGCCAAGTCGCGTGAGGGAAGACGGTCTT  
ATGGATTGTAAACCTCTTTTGTTCGGGGAGCAAAAGACGCCACGTGT

>Consensus7 len=490 tot-seq=3537  
AGAGTTTGCATCATGGCTCAGGATGAACGCTAGCGACAGGCTTAACACATGCAAGTCGAGG  
GGCAGCGGGGAGTAGCAATACTCCCGCCGGCGACCGGCGCACGGGTGAGTAACACGTAT  
GAAACCTGCCCGTAGCAGGGGGATAAGCGGAAGAAATTCGGTCTAATACCGCGTAACAAC  
CCTTGGAGGCATCTCCTCGGGTTTAAAGGAAGCGATTCCGGCTACGGATGGTCATGCGTC  
GCATTAGCTTGTGGCGGGGTAACGGCCCACCAAGGCGACGATGCGTAGGGGTTCTGAGA

GGAAGGTCCCCCACACTGGTACTGAGACACGGACCAGACTCCTACGGGAGGCAGCAGTG  
AGGAATATTGGTCAATGGCCGAGGGCTGAACCAGCCAAGTCGCGTGAGGGATGACGGTC  
CTATGGATTGTAAACCTCTTTTGTGAGGGAGCAAAGGGCGTCACGTGTGGCGTTTTGCGA  
GTACCTGAAG

>Consensus8 len=448 tot-seq=3444

AGAGTTTGATCATGGCTCAGGACGAACGCTGGCGGCGTGCCTAATACATGCAAGTCGAGC  
GAGCTGAACCAGCAGATTCACTTCGGTGATGACGCTGGGAACGCGAGCGGCGGATGGGTG  
AGTAACACGTGGGTAACTGCCCTAAAGTCTGGGATAACACTTGGAAACAGGTGCTAATA  
CCGGATAACAACAATAGCTGCATGGCTATTGCTTAAAAGGCGGCGAAAGCTGTGCGCTAAA  
GGATGGACCCGCGGTGCATTAGCTAGTTGGTAAGGTAATGGCTTACCAAGGCGACGATGC  
ATAGCCGAGTTGAGAGACTGATCGGCCACATTGGGACTGAGACACGGCCAAACTCCTAC  
GGGAGGCAGCAGTAGGGAATCTTCCACAATGGGCGAAAGCCTGATGGAGCAACGCCGCGT  
GAGTGAAGAAGGTTTTTCGGATCGTAAAG

>Consensus9 len=517 tot-seq=3044

AGAGTTTGATCATGGCTCAGGATGAACGCTAGCGACAGGCTTAACACATGCAAGTCGAGG  
GGCAGCGGGGAGTGGAACACTTCCGCCGGCGACCGGCGCACGGGTGAGTAACACGTAT  
GAAACCTGCCCCGAGCAGGGGGATAAGCGGAAGAAATTCGCTCTAATACCGCGTAACAAC  
CGACGGGGGCATCCCTGTTGGTTCAAAGGAGCGATCCGGCTGCGGATGGTCATGCGGCGC  
ATTAGCTAGTTGGCGGGGCAACGGCCACCAAGGCGACGATGCGTAGGGGTTCTGAGAGG  
AAGGTCCCCCACACTGGTACTGAGACACGGACCAGACTCCTACGGGAGGCAGCAGTGAGG  
AATATTGGTCAATGGCCGAGAGGCTGAACCAGCCAAGTCGCGTGAGGGATGACGGCCCTA  
CGGGTTGTAAACCTCTTTTGCCTGGGAGCAAAGAGCGGGACGCGTCCCGCCTCGAGAGTA  
CCCGGAGAAAAGCATCGGCTAACTCCGTGCCAGCAG

>Consensus10 len=493 tot-seq=2072

AGAGTTTGATCATGGCTCAGGATGAACGCTAGCGACAGGCTTAACACATGCAAGTCGAGG  
GGCAGCGGGGTAGTGCTTGCACTACTGCCGGCGACCGGCGCACGGGTGAGTAACACGTAT  
GAAACCTGCCCCGAGCAGGGGGATAAGCGGAAGAAATTCGCTCTAATACCGCGTAACAAC  
GTTGGGAGGCATCTCCCGATGTTTAAAGATTTATCGGCTGCGGATGGCCATGCGGCGCAT  
TAGCTAGTTCGGCGGGGTAACGGCCACCGAGGCGACGATGCGTAGGGGTTCTGAGAGGAA  
GGTCCCCCACACTGGTACTGAGACACGGACCAGACTCCTACGGGAGGCAGCAGTGAGGAA  
TATTGGTCAATGGCCGAGAGGCTGAACCAGCCAAGTCGCGTGAGGGAAGACGGCCCTACG  
GGTTGTAAACCTCTTTTGTGCGGGGAGCAAAGCGAGTCACGTGTGACTCATTGAGAGTACC  
CGAAGAAAAGCA

>Consensus11 len=462 tot-seq=2038

AGAGTTTGATCATGGCTCAGGATGAACGCTAGCTACAGGCTTAACACATGCAAGTCGAGG  
GGCATCATGGCGGTGCGTTGCGACCGCTGATGGCGACCGGCGCACGGGTGCGTAACGCGT  
ATCGAACCTGCCGCATACCCGGGGATAGCCTTGCGAAAAGCAAGATTAATACCCGATGTTT  
TCACTGTTCCGCATGTTACGGTGAGCAAAGAATTTTCGGTATGCGATGGCGATGCGTCCCA  
TTAGCTAGTTGGCGGGGTAACGGCCACCAAGGCTCCGATGGGTAGGGGTTCTGAGAGGA  
AGGTCCCCCACACTGGAAGTGAACGACCGGTCCAGACTCCTACGGGAGGCAGCAGTGAGGA  
ATATTGGTCAATGGACGCAAGTCTGAACCAGCCAAGTAGCGTGCAGGATGACGGCCCTCC  
GGTTGTAAACTGCTTTTAGTTGGGAATAAAAGGGGGCTCGT

>Consensus12 len=474 tot-seq=1988

AGAGTTTGATCATGGCTCAGGATGAACGCTAGCGACAGGCTTAACACATGCAAGTCGAGG  
GGCAGCGGGGTAGTAAGCTTGCTTACTACTGCCGGCGACCGGCGCACGGGTGAGTAACAC  
GTATGCAACCTGGCCGTACAGAGGGATAACCGGGAGAAAATCCCGCCTAATACCGCATAA  
TACCGGGGAAGGACATCCTTTCCCGGTCAAAGGAGCGATCCGGTGACGAATGGGCATGCG  
CCGCATTAGTTAGTTGGCGGTGTAACGGACCACCAAGACGACGATGCGTAGGGGTTCTGA  
GAGGAAGGTCCCCCACACTGGTACTGAGACACGGACCAGACTCCTACGGGAGGCAGCAGT  
GAGGAATATTGGTCAATGGGCGAGAGCCTGAACCAGCCAAGTCGCGTGAGGGAAGACGGT  
CCTATGGATTGTAAACCTCTTTTGCCTGGGAGCAAAAAGCGGTACGTGTACCGC

>Consensus13 len=462 tot-seq=1878

AGAGTTTGATCATGGCTCAGGATGAACGCTGGCGGCGTGCCTTAACACATGCAAGTCGAAC  
GGGCTCATATTGAAACCTAGTGATGTATGAGTTAGTGGCGGACGGGTGAGTAACGCGTGG

AGAACCTGCCGTATACTGGGGGATAAACACTTAGAAATAGGTGCTAATACCGCATAAGCGC  
ACAGCTTCGCATGAAGCAGTGTGAAAACTCCGGTGGTATACGATGGATCCGCGTCTGAT  
TAGCTGGTTGGCGGGGTAACAGCCCACCAAGGCGACGATCAGTAGCCGGCCTGAGAGGGT  
GAACGGCCACATTGGGACTGAGACACGGCCAACTCCTACGGGAGGCAGCAGTGGGGAA  
TATTGCACAATGGGGAAACCCTGATGCAGCGACCCGCGTGAGTGAAGAAGTATTTTCG  
TATGTAAGCTCTATCAGCAGGGAAGAAAATGACGGTACCTG

>Consensus14 len=474 tot-seq=1773

AGAGTTTGATCATGGCTCAGGATGAACGCTAGCGACAGGCTTAACACATGCAAGTCGAGG  
GGCAGCGGTGGTGAAGGCTTGCCTTTACCAGCCGGCGACCGGCGCACGGGTGAGTAACAC  
GTATGCAACCTGCCTGCCACAGCCGATAATCGGGAGAAAATCCGTCTAATACGGCATAA  
TGCACCTATGGGACATCCTGTTGGTGCCAAAGGTTAATTCGGTGGCGGATGGGCATGCG  
TCGCATTAGTTAGTTGGCGGTGTAACGGACCACCAAGACGACGATGCGTAGGGGTTCTGA  
GAGGAAGTCCCCACACTGGTACTGAGACACGGACCAGACTCCTACGGGAGGCAGCAGT  
GAGGAATATTGGTCAATGGGCGGGAGCCTGAACCAGCCAAGTCGCGTGAGGGATGACGGC  
CCTATGGGTTGTAAACCTCTTTTGCCTGGGGAGCAAAGTGCCGCACGTGTGCGGT

>Consensus15 len=503 tot-seq=1703

AGAGTTTGATCATGGCTCAGGATGAACGCTAGCGACAGGCCTAACACATGCAAGTCGAGG  
GGCAGCGGGGAGCGAAGCTTGCCTTTGCTCCGCCGGCGACCGGCGCACGGGTGAGTAACGC  
GTATGCAACCTGCCCCTTCAGCGGGATAACCCGGAGAAAATCCGGCCTAATACCGCATGT  
GGCCGAGGGAAGGCATCTTCTTTCCGGCAAAGGAGGCGACTCCGGAGACGGATGGGCATG  
CGTGACATTAGCTTGTGGCGGGTAACGGCCACCAAGGCGACGATGTCTAGGGGTTCT  
GAGAGGAAGTCCCCACACTGGTACTGAGACACGGACCAGACTCCTACGGGAGGCAGCA  
GTGAGGAATATTGGTCAATGGGCGAGAGCCTGAACCAGCCAAGTCGCGTGAAGGATGACG  
GCCCTACGGGTTGTAAACTCTTTTGTGAGGGAGCAAATGGGTCCACGTGTGGGCTTAGC  
GAGAGTACCTGAAGAAAAAGCAT

>Consensus16 len=476 tot-seq=1617

AGAGTTTGATCCTGGCTCAGGATGAACGCTAGCGACAGGCTTAACACATGCAAGTCGAGG  
GGCAGCGGGTAGATGAGCTTGCCTATTTATGCCGGCGACCGGCGCACGGGTGAGTAACAC  
GTATGCAACCTGCCCCTCAGGGGGATAATCGTCCGAAACGGCGTCTAATACCCCGTAT  
GAAGCTGGACGGCATCGTCTGGTTTTGAAAGAATATCGGAGACGGATGGGCATGCGGGCGC  
ATTAGCTGGTTGGCGGGGTAACGGCCACCAAGGCGACGATGCGTAGGGGTTCTGAGAGG  
AAGTCCCCACACTGGTACTGAGACACGGACCAGACTCCTACGGGAGGCAGCAGTGAAGG  
AATATTGGTCAATGGGCGAGAGCCTGAACCAGCCAAGTCGCGTGAGGGAGTACTGCCCTA  
TGGGTTGTAAACCTCTTTTGTGCGGGGAGCAAAGCCGGACGTGTCCGTCTGTGAGA

>Consensus17 len=497 tot-seq=1537

AGAGTTTGATCATGGCTCAGGATGAACGCTAGCGACAGGCTTAACACATGCAAGTCGAGG  
GGCAGCGGGGTTGTAGCAATAACAAGTCCCGGCGACCGGCGCACGGGTGAGTAACACGTAT  
GTAACCTGCCCTCTGCAGGGGGATAAGCGGAAGAAAATTCGTCTAATACCGCATAATACA  
ATTTGGAGACATCTCCGGGTTGTCAAAGGAGTGATCCGGCAGAGGATGGACATGCGGGCGC  
ATTAGCTAGTCGGCGGGGTAACGGCCACCGAGGCTACGATGCGTAGGGGTTCTGAGAGG  
AAGTCCCCACACTGGTACTGAGACACGGACCAGACTCCTACGGGAGGCAGCAGTGAAGG  
AATATTGGTCAATGGGCGGAAGCCTGAACCAGCCAAGTCGCGTGAGGGAAAGACGGTCCCTA  
TGGATTGTAAACCTCTTTTGCAGGGGAGCAAAGGCGCGGTACGTGTACCGCGAAGGAGAGT  
ACCCTGAGAAAAAGCAT

>Consensus18 len=447 tot-seq=1418

AGAGTTTGATCATGGCTCAGGATGAACGCTGGCGGCGTGCCTAACACATGCAAGTCGAAC  
GGAGATGGTGTAAAGCGGAGACTTCGGTCAAAGGTTATAGTATCTTAGTGGCGGACGGGTG  
AGTAACGCGTGGGTAACCTGCCGTATACAGGGGGATAACAACCTGGAACAGTTGCTAAAA  
CCGCATAAGCGCACACTGTTGCATGACAGAGTGTGAAAAATTCGGGAGGTATACGATGGA  
CCCGCTCTGATTAGCCAGTTGGCAGGGTAACGGCCTACCAAAGCGACGATCAGTAGCCG  
GCCTGAGAGGGTGGACGGCCACATTGGGACTGAGACACGGCCAACTCCTACGGGAGGC  
AGCAGTGGGGGATATTGCACAATGGGGGAAACCCTGATGCAGCGACCGCCGCGTGAGTGAA  
GAAGCATTTCGGTGTGTAAAGCTCTAT

>Consensus19 len=509 tot-seq=1377

AGAGTTTGATCCTGGCTCAGGATGAACGCTAGCGACAGGCTTAACACATGCAAGTCGAGG  
GGCAGCGGGAAGGTTAGCTTGCTAACCTTTGCCGGCGACCGGCGCACGGGTGAGTAACAC  
GTATGCAACCTGTCCGGTACAGGGGGATAAGCGGCGGAAACGCCGTCTAATACCGCGTGA  
CAACCCGAGGGGGCATCCCCTTGGGTTCAAAGGAGAGATCCGGTACCGGCTGGGCATGCG  
GCGCATTAGCTAGTTGGCGGGGCAACGGCCACCAAGGCGACGATGCGTAGGGGTTCTGA  
GAGGAAGGTCCCCCACACTGGAAGTGAACACGGTCCAGACTCCTACGGGAGGCAGCAG  
TGAGGAATATTGGTCAATGGGCGCAAGCCTGAACCAGCCAAGTCGCGTGAGGGAAGACGG  
CCCTACGGGTTGTAAACCTCTTTTGGCGGGGAGCAAGCCTGAGCACGTGTGCCAGGCGG  
AGAGTACCCGGAGAAAAAGCATCGGCTAA

>Consensus20 len=377 tot-seq=1234

AGAGTTTGATCATGGCTCAGGATGAACGCTGGCGGCGTGCCTAATACATGCAAGTCGAGC  
GAACCACTTCGGTGGGAAGCGGCGAACGGGTGAGTAACACGTAGGTGATCTGCCCATCAG  
ACGGGGACAACGATTGGAACGATCGCTAATACCGGATAGGACGAAAGTTTAAAGATGCT  
CCTGGCATCACTGATGGATGAGCCTGCGGCGCATTAGCTAGTTGGTGGGGTAAAGGCCTA  
CCAAGGCGACGATGCGTAGCCGACCTGAGAGGGTGAACGGCCACACTGGGACTGAGACAC  
GGCCAGACTCCTACGGGAGGCAGCAGTAGGGAATCTTCGGCAATGGGCGAAAGCCTGAC  
CGAGCAACGCCGCGTGA

>Consensus21 len=469 tot-seq=1202

AGAGTTTGATCCTGGCTCAGGATGAACGCTGGCGGCATGCCTAATACATGCAAGTCGAAC  
GAGGTCCTTCGGGACTCGAGTGGCGAACGGGTGAGTAACACGTAGGGAACCTGCCCGTG  
CGACCGGGGAGAACTTTCGAAACGGAAGCTGATACCGGATAGGGACAGAGACGGCATCGA  
CTCTGTGTTAAAGGAGCTGAAAGGCTCCGCGCACGGATGGACCTGCGGTGCATTAGCTGG  
TTGGTGAAGTAACGGCCACCAAGGCGACGATGCATAGCCGGCCTGAGAGGGCGGACGGC  
CACACTGGGACTGAGACACGGCCAGACTCCTACGGGAGGCAGCAGTAGGGAATTTTCGT  
CAATGGGCGCAAGCCTGAACGAGCAATGCCGCGTGAACGAGGAAGGTCTTCGGATCGTAA  
AGTTCTGTTGAAGGGGAAAAAGAGCGGAGAGAGGAAATGGTCTCCGATT

>Consensus22 len=479 tot-seq=1130

AGAGTTTGATCCTGGCTCAGGATGAACGCTAGCGACAGGCTTAACACATGCAAGTCGAGG  
GGCAGCGGAGGCGAGAGCTTGCTCTCGCCTGCCGGCGACCGGCGCACGGGTGAGTAACAC  
GTATGCAACCTGCCCCCTGCAGGAGGATAAACC GGAGAAAATCCCGACTAATACTGCATAA  
CACCTGGGGCCACATGGCTTCGGGGTCAAAGGAAGCAATTCGGGCAGGGGATGGGCATG  
CGGCGCATTAGCCAGTTGGCGGGGTAACGGCCACCAAAGCGACGATGCGTAGGGGTTCT  
GAGAGGAAGGTCCCCCACATTGGTACTGAGACACGGACCAAACCTCCTACGGGAGGCAGCA  
GTGAGGAATATTGGTCAATGGGCGCAAGCCTGAACCAGCCAAGTCGCGTGAGGGATGACC  
GTCTTATGGATTGTAAACCTCTTTTGTGCGGGGAGCAAGGCCCGCCACGTGTGGCGGGAA

>Consensus23 len=500 tot-seq=1026

AGAGTTTGATCCTGGCTCAGGATGAACGCTAGCGACAGGCTTAACACATGCAAGTCGAGG  
GGCAGCGGGGAGTGAGGCTTGCTTACTTTGCCGGCGACCGGCGCACGGGTGAGTAACAC  
GTATGCAACCTACCCTTTACAGCGGGATAAACC GGAAAGAAAATTCGCCTAATACCGCATAT  
ACTCCTTGGGAGGCATCTTCCGAGGGGGGAAGAATTTCCGGTGAAGGATGGGCATGCGTCC  
CATTAGTTAGTTGGCGGTGTAACGGACCACCAAGACGACGATGCGTAGGGGTTCTGAGAG  
GAAGGTCCCCCACACTGGTACTGAGACACGGACCAGACTCCTACGGGAGGCAGCAGTGA  
GGAATATTGGTCAATGGCCGAGAGGCTGAACCAGCCAAGTCGCGTGAGGGAAGAATGTCC  
TATGGATTGTAAACCTCTTTTGTGTCAGGGAGCAAAGTCAACCACGTGTGGGTGTTGGAGAG  
TACCTGAAGAAAAAGCATCG

>Consensus24 len=440 tot-seq=1024

AGAGTTTGATCATGGCTCAGGATGAATGCTGGCGGCGTGCCTAATACATGCAAGTCGAGC  
GGTAGCAGGGCTTACCGTTCCTTGTGCGACTTGGCCTTTGAGCAAGTGGTCTGGATAC  
GAGGGAACAGTGAAGCTGCTGACGAGCGGCGGACGGCTGAGTAACGCGTGGGAACATAAC  
CCAAAGTGAGGGATAACTACTCGAAAGAGTGGCTAATACCGCATATGATCTTCGGATTAA  
AGCATTTATGCGCTTTGGGAATGGCCTGCGTACGATTAGATAGTTGGTGAAGTAAAGGCT  
CACCAAGTCGACGATCGTTAGATGGTTTGAAGGATGATCATCCAGACTGGGACTGAGAC  
ACGGCCCAGACTCCTACGGGAGGCAGCAGTAGGGAATCTTTCACAATGGGCGAAAGCCTG  
ATGGAGCAACGCCGCGTGA

>Consensus25 len=481 tot-seq=1015

AGAGTTTGCATCATGGCTCAGGATGAACGCTAGCGACAGGCCTAACACATGCAAGTCGAGG  
GGCATCGGGGCTAGGAGCTATCCTTGCCGCCGGCGACCGGCGCACGGGTGAGTAACGCGT  
ATGCGACCTGCCCCGTTGCAGGGGATAATCGGGAGAAAATCCCGTCTAATACCGCGTAACG  
CCGCGGGGCTGCATGGCCCTGCGGCCAAAGGGAGCGATTCGGCAACGGATGGGCATGCG  
TGACATTAGCTAGTTGGCGGGGCAACGGCCACCAAGGCGACGATGTCTAGGGGTTCTGA  
GAGGAAGTCCCCACACTGGTACTGAGACACGGACCAGACTCCTACGGGAGGCAGCAGT  
GAGGAATATTGGTCAATGGGCGGAGCCTGAACCAGCCAAGTCGCGTGAGGGATGACGGC  
CCTACGGGTTGTAAACCTCTTTTGTGCGGGAGCAAATTCGCCACGTGTGGCGGAGTCA  
G

>Consensus26 len=479 tot-seq=1006

AGAGTTTGCATCATGGCTCAGGATGAACGCTGGCGGCGTGCTTAACACATGCAAGTCGAAC  
GAAGCACTCTTTTAGATTTCTTTCGGGGAAGAAGAAATTTGTGACTGAGTGGCGGACGGGT  
GAGTAACGCGTGGGCAACCTGCCCCATACAGGGGGATAACAGCCGGAACGGCTGCTAAA  
ACCGCATAAGCGCACAAAGGCCGCATGGCCTGGTGTGAAAACTCCGGTGGTATGGGATG  
GGCCCGCGTCTGATTAGCTAGTTGGCGGGGAGAGGCCACCAAGGCGACGATCAGTAGC  
CGACCTGAGAGGGTGGCCGGCCACATTGGGACTGAGACACGGCCAAACTCCTACGGGAG  
GCAGCAGTGGGGAATATTGCACAATGGGGGAAACCCTGATGCAGCGACGCCGCGTGAGCG  
AGAAGTATTTTCGGTATGTAAAGCTCTATCAGCAGGGAAGAAAATGACGGTACCTGAG

>Consensus27 len=446 tot-seq=925

AGAGTTTGCATCATGGCTCAGGATGAACGCTGGCGGCGTGCTTAACACATGCAAGTCGAAC  
GAAGCATGTAAAACAATCCTTTCGGGTGCGTTTTATATGACTGAGTGGCGGACGGGTGAGT  
AACGCGTGGGGAACCTGCCGTATGCAGGGGGACAACAGTCAGAAATGACTGCTAATACCG  
CATAAGCACACAATGCTGCATGGCATGGTGTGAAAAGATTTATCGGCATACGATGGCCCC  
GCGTCTGATTAGCCAGTTGGCAGGGTAACGGCCTACCAAAGCAACGATCAGTAGCCGGCT  
TGAGAGAGTGACCGGCCACATTGGGACTGAGACACGGCCCAGACTCCTACGGGAGGCAGC  
AGTGGGGAATATTGCACAATGGGGGAAACCCTGATGCAGCGACGCCGCGTGAGTGATGAA  
GTATTTTCGGTATGTAAAGCTCTATCA

>Consensus28 len=436 tot-seq=754

AGAGTTTGCATCCTGGCTCAGGATGAACGCTGGCGGCGTGCCCTAACACATGCAAGTCGAAC  
GGGGCGCGGCGGCTGAGGCTTTTTCGGAGCGGAAGCCGGCGCTGCCAGTGGCGGACGGGT  
GAGTAACGCGTGGGCAACCTGCCCTGCACTGGGGGACAACAGCCGGAACGGCTGCTAAT  
ACCGCATATGCCCCGACCCCCGCATGGGGCGGCGGGGGAAGCTCCGGCGGTGCAGGATGG  
GCCCCGCTCTGATTAGCTGGTTGGCGGGGCAACGGCCCCACCAAGGCGACGATCAGTAGCC  
GGCCTGAGAGGGTGGGCGGCCACATTGGGACTGAGACACGGCCCAGACTCCTACGGGAGG  
CAGCAGTGGGGGATATTGCACAATGGGGGAAACCCTGATGCAGCGACGCCGCGTGAGTGA  
TGGAGTGCTTCGGCAT

>Consensus29 len=507 tot-seq=717

AGAGTTTGCATCCTGGCTCAGGATGAACGCTAGCTACAGGCTTAACACATGCAAGTCGAGG  
GGCAGCATGGCCTATCTTTTCGGGATGGGCCGATGGCGACCGGCGCACGGGTGAGTAACGC  
GTATCCAACCTTCCCTTTACTGGGGTCCAGCCCGTCGAAAGGCGGATTAATCCCCCATGT  
TCTCCGTCCCGGACATCTGTGTGCGGAGCAAAGATTTATCGGTAAAGGATGGGGATGCGTC  
CGATTAGCTTGTGGCGGGGTAACGGCCACCAAGGCATCGATCGGTAGGGGTTCTGAGA  
GGAAGTCCCCCACACTGGAACCTGAGACACGGTCCAGACTCCTACGGGAGGCAGCAGTG  
AGGAATATTGGTCAATGGCCGTAAGGCTGAACCAGCCAAGTAGCCTGAGGGAAGACTGCC  
CTATGGGTTGTAAACCTCTTTTATGCGGGGATAAAGGTGTCCACGTGTGGATGTTTGCAG  
GTACCGCATGAATAAGGACCGGCTAAT

>Consensus30 len=479 tot-seq=686

AGAGTTTGCATCCTGGCTCAGGACGAACGCTGGCGGCACGCCTAACACATGCAAGTCGAAC  
GGTGAAGGGGAGCTTGCTCCTCCGGAACAGTGGCGGACGGGTGAGTAACACGTGAGCAA  
CCTGCCTTTTCAGAGGGGGACAACAGTTGGAAACGACTGCTAATACCGCATAACGTATTTT  
GGCGGCATCGCCGGAATACCAAAGGAGCAATCCGCTGAAAGATGGGCTCGCGTCTGATTA  
GATAGTTGGTGAAGTAACGGCTCACCAAGTCGACGATCAGTAGCCGACTGAGAGGTTGA  
ACGGCCACATTGGGACTGAGACACGGCCCAGACTCCTACGGGAGGCAGCAGTGGGGGATA

TTGGACAATGGGGGAAACCCTGATCCAGCGATGCCGCGTGAGGGAAGAAGGTTTTTCGGAT  
TGTA AACCTCTGTGGAGGGGACGATAATGACGGTACCCCTTTAGGAAGCCACGGCTAA  
>Consensus31 len=493 tot-seq=667

AGAGTTTGATCATGGCTCAGGATGAACGCTAGCGACAGGCTTAACACATGCAAGTCGAGG  
GGCAGCGGGGGCGCAGCAATGCGCCTGCCGGCGACCGGCGCACGGGTGAGTAACACGTAT  
GCAACCTGCCCCGCCGAGGGGTATAACCGGGGGAAACCCCGACTAATCCCGCATGACACC  
CCGTGGAGGCATCTCCTCGGGGTCAAAGGAGCGATCCGGCGGCGGATGGGCATGCGTCGC  
ATTAGCTAGTCGGCGGGGTAACGGCCACCAGGGCGACGATGCGTAGGGGTTCTGAGAGG  
AAGGCCCCCACACTGGTACTGAGACACGGACCAGACTCCTACGGGAGGCAGCAGTGAGG  
AATATTGGTCAATGGGCGAAGCCTGAACCAGCCAAGTCGCGTGAGGGAAGAAGGCCCTG  
CGGGTCGCAGACCTCTTTGGACGGGGAGCAAGGCCGCCGACGTGTCGGCGGAAGGAGAGT  
ACCCGTAGAACAA

>Consensus32 len=474 tot-seq=648

AGAGTTTGATCATGGCTCAGGATGAACGCTGGCGGCATGCCTAACACATGCAAGTCGAAC  
GGGTTTTATATAACAGA ACTCTCCGGAGGGAAGATATATAAACCTAGTGGCGGACGGGTG  
AGTAACGCGTGGGCAACCTGCCCTGTACCGGGGGACAACAGCCAGAAATGGCTGCTAATA  
CCGCATAAGCCTGCTGTGCCGCATGGCACAGCAGGGAAAACACGGTGGTACAGGATGGG  
CCC GCGTCTGATTAGTTAGTTGGCAGGGTAACGGCCTACCAAGACAACGATCAGTAGCCG  
GCTTGAGAGAGTGGACGGCCACATTGGGACTGAGACACGGCCAGACTCCTGCGGGAGGC  
AGCAGTGGGGAATATTGCACAATGGGGGAAACCCTGATGCAGCAATGCCGCGTGGGTGAA  
GAAGCACTCCGGTGCCTAAAGCCCTGTCAGCAGGGAAGAAAATGACAGTACCTG

>Consensus33 len=515 tot-seq=630

AGAGTTTGATCATGGCTCAGGATGAACGCTGGCGGCGTGCTTAACACATGCAAGTCGAAC  
GAAGCATTTACACGGAATCCCTCGGGAGGAAGTGTGAATGACTGAGTGGCGGACGGGTGA  
GTAACGCGTGGGCAACCTGCCCGTACCGGGGGATAACAGCCGGAACGGCTGCTAATAC  
CGCATATGCTTTGCGGGCCGCATGGCCCGCAAAGCAAACTCCGGTGGTACGGGATGGGC  
CCGCGTCTGATTAGCTGGTTGGCGGGGTAACGGCCACCAGGCGACGATCAGTAGCCGG  
CCTGAGAGGGCGGCCGGCCACATTGGGACTGAGACACGGCCAGACTCCTGCGGGAGGCA  
GCAGTGGGGAATATTGCACAATGGGGGAAACCCTGATGCAGCAGCGCCGCGTGGGCGAGG  
AAGTACCTCGGTATGTAAAGCCCTATCAGCAGGGAAGAAAACAGGACAGTACCTGACTAAG  
AAGCCCCGGCTAACTACGTGCCAGCAGCCGCGGTA

>Consensus34 len=505 tot-seq=574

AGAGTTTGATCATGGCTCAGGATGAACGCTAGCGGCAGGCTTAACACATGCAAGTCGAGG  
GGCAGCGAGATCAGTGCTTGC ACTGATTGTGCGGCGACCGGCGCACGGGTGCGTAACGCGT  
ATGCAACCTACCCATTACAGGGGGATAACACTGAGAAAATCGGTACTAATACCCCATAAACA  
TCCAGGGAGGCATCTTCTTGGGTTGAAA ACTCCGGTGGTAATGGATGGGCATGCGTTGTA  
TTAGTTAGTTGGTGGGGTAACGGCTCACCAAGACAACGATACATAGGGGGACTGAGAGGT  
TAACCCCCACATTGGTACTGAGACACGGACCAA ACTCCTACGGGAGGCAGCAGTGAGGA  
ATATTGGTCAATGGACGCAAGTCTGAACCAGCCATGCCGCGTGCAGGAAGACGGCTCTAT  
GAGTTGTAAACTGCTTTTGTACGAGGGTAAACGCAGATACGTGTATCTGTCTGAAAGTAT  
CGTACGAATAAGGATCGGCTAACTC

>Consensus35 len=509 tot-seq=545

AGAGTTTGATCATGGCTCAGGATGAACGCTAGCTACAGGCTTAACACATGCAAGTCGAGG  
GGCAGCATGAAAGTTTGCTTGCAA ACTTTTGATGGCGACCGGCGCACGGGTGAGTAACAC  
GTATCCAACCTGCCTCATACTCGGGGATAGCCTTTTCGAAAAGAAAGATTAATACCCGATGT  
CATAGTCCTACCGCATGATGGGATTATTAAGAATTTCCGGTATGGGATGGGGATGCGTTC  
CATTAGTTAGTTGGCGGGGTAACGGCCACCAGACAACGATGGATAGGGGTTCTGAGAG  
GAAGGTCCCCACATTGGA ACTGAGACACGGTCCAA ACTCCTACGGGAGGCAGCAGTGAG  
GAATATTGGTCAATGGACGAGAGTCTGAACCAGCCAAGTAGCCTGAAGGATGACTGCCCT  
ATGGGTTGTAAACTTCTTTTATATGGGAATAAAATGTTCCACGTGTGGGATTTTGTATGT  
ACCATATGAATAAGGATCGGCTAACTCCG

>Consensus36 len=493 tot-seq=544

AGAGTTTGATCCTGGCTCAGGATGAACGCTAGCGACAGGCTTAACACATGCAAGTCGAGG  
GGCAGCACGGGCAGCAATGCC TGGTGGCGACCGGCGCACGGGTGAGTAACGCGTATGCAA

CTTGCCTATCAGAGGGGAACAGCCCGGCGAAAGTCCGATTAATGCCCCATAAAACAGGGA  
TCCCGCATGGGGTTATTTGTTAAAGATTTCATCGCTGATAGATAGGCATGCGTTCCATTAG  
GCAGTTGGCGGGGTAACGGCCACCAAACCGACGATGGATAGGGGTTCTGAGAGGAAGGT  
CCCCACATTGGAAGTGAACACGGTCCAACTCCTACGGGAGGCAGCAGTGAGGAATAT  
TGGTCAATGGCCGTAAGGCTGAACCAGCCAAGTCCGCTGAAGGAAGAAGGATCTATGGTT  
TGTAAACTTCTTTTATAGGGGAATAAAGGTATCCACGTGTGGATATTTGCATGTACCCTA  
TGAATAAGCATCG

>Consensus37 len=517 tot-seq=528

AGAGTTTGATCCTGGCTCAGGATGAACGCTAGCGGCAGGCTTAACACATGCAAGTCCGGC  
GGCAGCGGGGTGGGAGCTTGCTCCCCTGCCGGCGAGCGGCGCACGGGTGAGTAACACGT  
ATGCAACCTGCCCCCTGTCAGGGGACAACCCGCCGAAAGGCGGGCTAAGCCCGGTATAT  
CGCCCCGGGGCATCCCCGGGGGAGGAAAGGAGCGATCCGGACAGGGATGGGCATGCGGCG  
CATTAGCTGGTCGGCGGGGTAACGGCCCACCGAGGCGACGATGCGTAGGGGTTCTGAGAG  
GAAGGCCCCCACACTGGTACTGAGACACGGACCAGACTCCTACGGGAGGCAGCAGTGAG  
GAATATTGGTCAATGGGCGGGAGCCTGAACCAGCCAAGCCGCTGAGGGAAGAAGGTACA  
GCGTATCGTAAACCTCTTTTGTGAGGGAACAAAGGCGGGGACTAGTCCCCGGATGAGGGT  
ACCTGAAGAAAAAGCATCGGCTAACTCCGTGCCAGCA

>Consensus38 len=515 tot-seq=526

AGAGTTTGATCATGGCTCAGGATGAACGCTAGCGGCAGGCTTAACACATGCAAGTCCGAGG  
GGCAGCGGGGGCGCGCTTGCGCGTCCCGCCGGCGACCGGCGCACGGGTGAGTAACACGT  
ATGCAACCTGCCCCGCCAGGGGTACAACCTCCGAAAGGGGGCTGATACCGCGTACAT  
CCCCGGGGGCATCCCCGGGGGAGGAAAGCCCTTCTGGGCGGGCGGGGATGGGCATGCGG  
CGCATTAGGAAGACGGCGGTGTGACGGACCACCGTTCCGACGATGCGTAGGGGTTCTGAG  
AGGAAGGCCCCCACACTGGTACTGAGACACGGACCAGACTCCTACGGGAGGCAGCAGTG  
AGGAATATTGGTCAATGGCCGGAAGGCTGAACCAGCCAAGCCGCTGAGGGAGGAAGGCG  
CAGAGCGTCGCAGACCTCTTTTGCCGGGGGACAAAAGGCCGACTCGTCCGGTCTCTGAGG  
GTACCCGGAGAAAAAGCATCGGCTAACTCCGTGCC

>Consensus39 len=481 tot-seq=493

AGAGTTTGATCATGGCTCAGGATGAACGCTGGCGGCGTGCCTAACACATGCAAGTCCGAGC  
GAAGCACTTGAATTGATTTCTTCGGATGAAGATTTTTGTGACTGAGCGGCGGACGGGTGA  
GTAACGCGTGGGCAACCTGCCTTACACAGGGGGATAACAGTTAGAAATGACTGCTAATAC  
CGCATAAGACCGCAGTACCGCATGGTACAGCGGTAACAACTCCGGTGGTGTAAGATGGGC  
CCGCGTCTGATTAGGTAGTTGGCGGGGTAACGGCCCACCAAGCCGACGATCAGTAGCCGA  
CCTGAGAGGGTGACCGGCCACATTGGGACTGAGACACGGCCCAGACTCCTACGGGAGGCA  
GCAGTGGGGAATATTGCACAATGGGGGAAACCTGATGCAGCGACGCCGCTGAGCGATG  
AAGTATTTCCGGTATGTAAAGCTCTATCAGCAGGGAAGAAAATGACGGTACCTGACTAAGA  
A

>Consensus40 len=512 tot-seq=491

AGAGTTTGATCATGGCTCAGGACGAACGCTGGCGGCGTGCCTAACACATGCAAGTCCGAAC  
GAAGCTTGACGAATGATTTCTTCGGAATGAAATCTGATATGACTGAGTGGCGGACGGGTG  
AGTAACGCGTGAGCAACCTGCCCTTCGGAGGGGGATAGTGTCTGGAAACGGACAGTAATA  
CCGCATAACGTATTTTTACCGCATGATAGAAATACCAAACTGAGGTGCCGAAGGATGGG  
CTCGCGTTGGATTAGATAGTTGGTGGGGTAACGGCCTACCAAGTCCGACGATCCATAGCCG  
GACTGAGAGGTTGAACGGCCACATTGGGACTGAGACACGGCCCAGACTCCTACGGGAGGC  
AGCAGTGGGGAATATTGCACAATGGGGGAAACCTGATGCAGCAACGCCGCTGAAGGAA  
GACGGTTTTTCGGATTGTAAACTTCTGTTCTTAGTGAAGAAGAATGACGGTAGCTAAGGAG  
CAAGCCACGGCTAACTACGTGCCAGCAGCCGC

>Consensus41 len=513 tot-seq=484

AGAGTTTGATCATGGCTCAGGATGAACGCTGGCGGCGTGCCTAACACATGCAAGTCCGAAC  
GGGAATGCCACGCTGATGCGATTTTCGGTCAAATCATGTGGCATTTCGAGTGGCGGACGGGT  
GAGTAACGCGTGGGTAACCTGCCTTACACAGGGGGATAACACCTGGAAACAGGTGCTAAT  
ACCGCATAAGCGCACAGGGCCGCATGGCCCCGTGTGAAAACTCCGGTGGTGTAAGATGG  
ACCCGCGTCTGATTAGCTTGTGGCGGGTAGGGGCCACCAAGGCGACGATCAGTAGCC  
GGCCTGAGAGGGTGGACGGCCACATTGGGACTGAGACACGGCCCAAACCTCCTACGGGAGG

CAGCAGTGGGGATATTGGACAATGGGGGAAACCCTGATCCAGCGACGCCGCGTGAGTGA  
AGAAGTATTTTCGGTATGTAAAGCTCTGTCTCAGCAGGGAAGAAAGAAATGACGGTACCTGAC  
CAAGAAGCCCCGGCTAACTACGTGCCAGCAGCC

>Consensus42 len=481 tot-seq=481

AGAGTTTGATCCTGGCTCAGGATGAACGCTGGCGGCGTGCCTAACACATGCAAGTCGAAC  
GAAGCGCTCGGACGGAGTCTCTTCGGAGAGGAAGGCCGGGCGACTGAGTGGCGGACGGGT  
GAGTAACGCGTGGGCAACCTGCCCTGCACAGGGGGACAACAGCCGAAACGGCTGCTAAT  
ACCGCATAAGCGCACAGCTTCGCATGAAGCGGTGCGAAAAGCTTTGGCGGTGCAGGATGG  
GCCCCGCTCTGATTAGCTTGTGGCGGGGCAACGGCCACCAAGGCGACGATCAGTAGCC  
GGCCTGAGAGGGTGGACGGCCACATTGGGACTGAGACACGGCCAGACTCCTACGGGAGG  
CAGCAGTGGGGAATATTGCACAATGGGGGAAACCCTGATGCAGCGACGCCGCGTGAGCGA  
AGAAGTATTTTCGGTATGTAAAGCTCTATCAGCAGGGAAGAAATGACGGTACCTGAGTAA  
G

>Consensus43 len=482 tot-seq=469

AGAGTTTGATCATGGCTCAGGATGAACGCTAGCGACAGGCTTAACACATGCAAGTCGAGG  
GGCAGCGGGGGCGGTAGCAATACTGCCTGCCGGCGACCGGCGCACGGGTGAGTAACACGT  
ATGCAACCTACCCTTGTGTCAGGGGATAAGCCGGAGAAATCCGGTCTAATACCGCGTGACA  
TCGGGATTCCGCATGGGATTCGGATCAAAGGATTTATCCGGACAAGGATGGGCATGCGGC  
GCATTAGCTAGTTGGCGGGGTAACGGCCACCAAGGCGACGATGCGTAGGGGTTCTGAGA  
GGAAGGTCCCCACACTGGTACTGAGACACGGACCAGACTCCTACGGGAGGCAGCAGTGA  
GGAATATTGGTCAATGGGCGAGAGCCTGAACCAGCCAAGTCGCGTGAGGGAATAAGGTCC  
TATGGATTGTAAACCTCTTTTGTGGGGAGCAATGAGCGTCACGTGTGATGCGTTGAGAG  
TA

>Consensus44 len=509 tot-seq=465

AGAGTTTGATCATGGCTCAGGATGAACGCTGGCGGCGTGCCTAACACATGCAAGTCGAGC  
GGAGCACATCATTGGAATCCTTCGGGAGGAAGAGGATGTGGCTTAGCGGCGGACGGGTGA  
GTAACGCGTGGACAACCTGCCCTATGCAGGGGGATAACATCCGAAACGGGTGCTAATAC  
CGCATAAGCGCACAGTACCGCATGGTACGGTGTGAAAAGCTGAGGCGGCATAGGATGGGT  
CCGCGTTGGATTAGGCAGTTGGCGGGGTAACGGCCACCAAACCGACGATCCATAGCCGG  
CCTGAGAGGGTGGACGGCCACATTGGGACTGAGACACGGCCAGACTCCTACGGGAGGC  
GCAGTGGGGAATATTGCACAATGGGGGAAACCCTGATGCAGCGACGCCGCGTGGGTGAGG  
AAGTACTTTCGGTATGTAAAGCCCTATCAGCAGGGAAGAAATGACGGTACCTGACTAAGA  
AGCCCCGGCTAACTACGTGCCAGCAGCCG

>Consensus45 len=481 tot-seq=455

AGAGTTTGATCCTGGCTCAGAGTGAACGCTGGCGGCGTGCCTAATACATGCAAGTCGAAC  
GATGAAGCTCTAGCTTGGCTAGAGTGGATTAGTGGCGCACGGGTGAGTAATGCATAGATAA  
CATGCCCTTTAGTCTAGGATAGCCATTGGAAACGATGATTAATACTGGATACTCCTTACG  
AGGGAAAGTTTTTCGCTAAAGGATTGGTCTATGTCTATCAGCTTGTGGTGGTGGTAAATG  
GCTCACCAAGGCTATGACGGGTATCCGGCCTGAGAGGGTGAACGGACACACTGGAACCTGA  
GACACGGTCCAGACTCCTACGGGAGGCAGCAGTAGGGAATATTGCTCAATGGGGGAAACC  
CTGAAGCAGCAACGCCGCGTGGAGGATGAAGGTTTTTCGGATTGTAAACTCCTTTTGTTAG  
AGAAGATAATGACGGTATCTAACGAATAAGCACCGGCTAACTCCGTGCCAGCAGCCGCGG  
T

>Consensus46 len=515 tot-seq=417

AGAGTTTGATCCTGGCTCAGGATGAACGCTGGCGGCGTGCCTAACACATGCAAGTCGAAC  
GAAGCATATAAAAGGAATTTCTTCGGAGAGGAATTTTATATGACTGAGTGGCGGACGGGT  
GAGTAACGCGTGGGCAACCTACCCACACAGGGGGACAACAGTTGGAAACGACTGCTAAT  
ACCGCATAGGCGCACAGCTTCGCATGAAGCAGTGTGGAAAACCGAGGTGGTGTGGGATGG  
GCCCCGCTCTGATTAGCTAGTTGGCGGGGTAACGGCCACCAAGGCGACGATCAGTAGCC  
GGCCTGAGAGGGTGGACGGCCACATTGGGACTGAGACACGGCCAAACTCCTACGGGAGG  
CAGCAGTGGGGAATATTGCACAATGGGGGAAACCCTGATGCAGCGACGCCGCGTGAGCGA  
AGAAGTATTTTCGGTATGTAAAGCTCTATCAGCAGGGAAGAAATGACGGTACCTGACTAA  
GAAGCCCCGGCTAAATACGTGCCAGCAGCCGCGGT

>Consensus47 len=486 tot-seq=391



AGAGTTTGATCATGGCTCAGGATGAACGCTAGCGGCAGGCTTAACACATGCAAGTCGAGG  
GGCAGCATGGGGAGTAGCAATACTCTCTGATGGCGACCGGCGCAAGGGTGCCTAACCGCT  
GAGCAACTTGCCCTCATCAGGGGAATAATCGCTGGAAACGGCGTCTAATGCCCCATGGTG  
ATGTCCTCAGGCATCTGAGGACATCTAAAGATCCGTCGGATGGGGATAGGCTCGCGTGAC  
ATTAGCTAGACGGCGGGGTAACGGCCACCGTGGCGACGATGTCTAGGGGTTCTGAGAGG  
AAGGTCCCCACACTGGAAGTGAACACGGTCCAGACTCCTACGGGAGGCAGCAGTGAGG  
AATATTGGTCAATGGCCGGAAGGCTGAACCAGCCATGCCGCGTGAAGGTCAGTGCCCTAT  
GGCGTTAAACTTCTTTTGTGCGGGAGCAATAATGGTCACGTGTGGCCAGACGAGAGTAC  
CGTACG

>Consensus48 len=483 tot-seq=369

AGAGTTTGATCATGGCTCAGGATGAACGCGCGGCTGTGCCTAATACATGCAAGTCGTAC  
GCACTGGCCCAACTGATTGATGGTGCTTGCACCTGATTGACGATGGATCACCAGTGAGTG  
GCGGACGGGTGAGTAACACGTAGGTAACCTGCCCCGGAGCGGGGATAACATTTGAAAC  
AGATGCTAATACCGCATAACAACAAAAGCCACATGGCTTTTGTGTTGAAAGATGGCTTTGG  
CTATCACTCTGGGATGGACCTGCGGTGCATTAGCTAGTTGGTAAGGTAACGGCTTACCAA  
GGCGATGATGCATAGCCGAGTTGAGAGACTGATCGGCCACAATGGAAGTGAACACGGTC  
CATACTCCTACGGGAGGCAGCAGTAGGGAATCTTCCACAATGGGCGCAAGCCTGATGGAG  
CAACACCGCGTGAGTGAAGAAGGGTTTCGGCTCGTAAAGCTCTGTTGTTGGAGAAGAAC  
TGC

>Consensus49 len=517 tot-seq=367

AGAGTTTGATCATGGCTCAGGATGAACGCTAGCTACAGGCTTAACACATGCAAGTCGAGG  
GGCATCATGGGGTTCAGCTTGCTGACCCTGATGGCGACCGGCGCACGGGTGCCTAACCGCT  
ATCGAACCTGCCCCGTTACTCGGGGATAGCCTTGCGAAAGTAAGATTAATACCCGATGCCA  
TGAATTTTCCGCATGGTGGATTTCATGAAAGATTTATTGGTAACGGATGGCGATGCGTCCC  
ATTAGGCAGTAGGCGGGGTAACGGCCACCTAACCTACGATGGGTAGGGGTTCTGAGAGG  
AAGGTCCCCACACTGGAAGTGAACACGGTCCAGACTCCTACGGGAGGCAGCAGTGAGG  
AATATTGGTCAATGGCCGGGAGGCTGAACCAGCCAAGTAGCGTGCAGGATGACGGCCCTC  
GTGGTTGTAAACTGCTTTTAGTCCGGAATAAAAAGGGGGTTCGTGAACCCCGTATTGTATG  
TACCGTCAGAAAAAGGACCGGCTAATTCCGTGCCAGC

>Consensus50 len=522 tot-seq=363

AGAGTTTGATCATGGCTCAGGATGAACGCTAGCGACAGGCTTAACACATGCAAGTCGAGG  
GGCAGCGGGGCTCCGAGCAATCGGAGGCCGCGGCGACCGGTCAGGTAACCGC  
GTATGCAACCTGCCCCGTTACGCGGGATAACCCGGAGAAAATCCGGACTAATACCGCACGC  
GACCGGAGGGAGGCATCTCCCTCCGGTCAAAGGAGGCAACTCCGGAGCCGGATGGGCATG  
CGTGGCATTAGCTAGTTGGCGGGGTAACGGCCACCAAGGCGACGATGCCTAGGGGTTCT  
GAGAGGAAGGTCCCCACACTGGTACTGAGACACGGACCAGACTCCTACGGGAGGCAGCA  
GTGAGGAATATTGGTCAATGGGCGGGAGCCTGAACCAGCCAAGTCCGCGTGAGGGACGACG  
GCCCTACGGGTTGTAAACCTCTTTTGCCTGGGAGCAATCACCGCCACGTGTGGCGGGGGC  
GAGAGTACCCGGAGAAAAAGCATCGGCTAACTCCGTGCCAGC

>Consensus51 len=519 tot-seq=355

AGAGTTTGATCATGGCTCAGGATGAACGCTAGCGACAGGCTTAACACATGCAAGTCGAGG  
GGCAGCGGGGAGCAAGCTTGCTTGCTCTGCCGCGACCGGCGCACGGGTGAGTAACACGT  
ATGCAACCTGCCCTCCGAGGGGGATAACCCGGAGAAAATCCGGACTAATACCGCGTGGTA  
CATCTGTGGGCATCCCACGGGTGTTAAAAGGAAGCGATTCCGGCGGAGGATGGGCATGC  
GGCGCATTAGCTAGTTGGCGGGGTAACGGCCACCAAGGCGACGATGCGTAGGGGTTCTG  
AGAGGAAGGTCCCCACACTGGTACTGAGACACGGACCAGACTCCTACGGGAGGCAGCAG  
TGAGGAATATTGGTCAATGGGCGGGAGCCTGAACCAGCCAAGTCCGCGTGAGGGAAAGACGG  
TCCTATGGATTGTAAACCTCTTTAGGCGGGGAGCAATGCCGGGCACGCGTGCCCGGAGGG  
AGAGTACCCGCAGAAATAAGCATCGGCTAACTCCGTGCCA

>Consensus52 len=517 tot-seq=349

AGAGTTTGATCCTGGCTCAGGATGAACGCTGGCGGCGTGCCTAACACATGCAAGTCGAAC  
GGACTTATAACGAAACCTAGTGAATTATAAGTTAGTGGCGGACGGGTGAGTAACCGCTGG  
AAAACCTGCCGTATACTGGGGGATAACACTTAGAAAATAGGTGCTAATACCGCATAAGCGC  
ACAGCTTCGCATGAAGCAGTGTGAAAAACTCCGGTGGTATACGATGGTTCCGCGTCTGAT

TAGCTAGTTGGTGAGGTAAAAGCCCACCAAGGCAACGATCAGTAGCCGGCCTGAGAGGGT  
GAACGGCCACATTGGGACTGAGACACGGCCAGACTCCTACGGGAGGCAGCAGTGGGGGA  
TATTGCACAATGGGGGAAACCCTGATGCAGCGACGCCGCGTGAGTGAAGAAGTATTTGCG  
TACGTAAAGCTCTATCAGCAGGGAAGAAAAAGTCCACAGGACTTTGGACGGTACCTGAC  
TAAGAAGCCCCGGCTAACTACGTGCCAGCAGCCGCGG

>Consensus53 len=508 tot-seq=348

AGAGTTTGATCCTGGCTCAGGATGAACGCTGGCGGCGTGCTTAACACATGCAAGTCGAAC  
GAAGCATTAGGCCGGACCCCTCCGGGGGAAAGCCTATCTGACTGAGTGGCGGACGGGT  
GAGTAACGCGTGGGCAACCTACCCACACAGGGGGACAACAGCCGAAACGGCTGCTAAT  
ACCGCATAAGCGCACAGCCCCGCATGGGGCGGTGCGGAAAGCTCCGGCGGTGTGGGATGG  
GCCCCGCTCTGATTAGCTAGTTGGCGGGCAGCGGCCACCAAGGCGACGATCAGTAGCC  
GGCCTGAGAGGGCGGACGGCCACATTGGGACTGAGACACGGCCAGACTCCTACGGGAGG  
CAGCAGTGGGGAATATTGCACAATGGGGGAAACCCTGATGCAGCGACGCCGCGTGAGCGA  
AGAAGTATCTCGGTATGTAAAGCTCTATCAGCAGGGAAGAAAATGACGGTACCTGACTAA  
GAAGCTCCGGCTAAATACGTGCCAGCAG

>Consensus54 len=521 tot-seq=321

AGAGTTTGATCATGGCTCAGGATGAACGCTGGCGGCGTGCTTAACACATGCAAGTCGAAC  
GGAGCCTTAACCAAAGAAGCAGCCAGCTTGCTGGAAGCGGAAAAGGGAAAGGCTTAGTGG  
CGGACGGGTGAGTAACGCGTGGGTAACCTGGCCCATAACAGGGGGATAAACAATTAGAAATA  
GGTGCTAATACCGCATAACAACAGAAAGCGCATGCTTTTTGTTTAAAACCAAGGTGGTA  
TGGGATGGACCCGCGTCTGATTAGCTGGTTGGCGGGGTAAAGGCCACCAAGGCGACGAT  
CAGTAGCCGGCCTGAGAGGGTGGACGGCCACATTGGGACTGAGACACGGCCAAACTCCT  
ACGGGAGGCAGCAGTGGGGAATATTGCACAATGGGGGAAACCCTGATGCAGCGACGCCGC  
GTGAGTGAAGAAGTAATTCGTTATGTAAAGCTCTATCAGCAGGGAAGAAAATGACGGTAC  
CTGAGTAAGAAGCCCCGGCTAACTACGTGCCAGCAGCCGCG

>Consensus55 len=512 tot-seq=320

AGAGTTTGATCCTGGCTCAGGATGAACGCTGGCGGCGTGCTTAACACATGCAAGTCGAGC  
GAAGCACTTTTTTAGAACTCTTCGGAGGGAAGAGAGGGTGACTTAGCGGCGGACGGGTGA  
GTAACGCGTGGGCAACCTGCCTTACACAGGGGGATAACAATTAGAAATGATTGCTAATAC  
CGCATAAGACCACGGTACTGCATGGTACAGAGGTAAAAACTGAGGTGGTGTAAGATGGGC  
CCGCGTCTGATTAGGTAGTTGGTGGGGTAGAAGCCTACCAAGCCGACGATCAGTAGCCGA  
CCTGAGAGGGCGACCCGGCCACATTGGGACTGAGACACGGCCAAACTCCTACGGGAGGCCA  
GCAGTGGGGAATATTGCACAATGGGGGAAACCCTGATGCAGCGACGCCGCGTGAGTGAGG  
AAGTATTTCCGTATGTAAAGCTCTATCAGCAGGGAAGAAAATGACGGTACCTGACTAAGA  
AGCCCCGGCTAACTACGTGCCAGCAGCCGCGG

>Consensus56 len=488 tot-seq=319

AGAGTTTGATCATGGCTCAGGATGAACGCTAGCGACAGGCCTAACACATGCAAGTCGAGG  
GGCAACGGGGATGTTAGCTTGCTAATATCTGCCGGCGACCCGGCGCACGGGTGAGTAACGC  
GTATGCGACCTGCCCGTACAGGGGGATAATCCGGAGAAAATCCGGTCTAATACCGCATAA  
TATCGTGAAGCTGCATGGTTTTGCGATTAAAGGAGCGATCCGGTGACGGATGGGCATGCG  
TGACATTAGCTAGTCGGCGGGGTAACGGCCACCGAGGCGACGATGTCTAGGGGTTCTGA  
GAGGAAGGTCCCCACACTGGTACTGAGACACGGACCAGACTCCTACGGGAGGCAGCAGT  
GAGGAATATTGGTCAATGGGCTTACGCCTGAACCAGCCAAGTCGCGTGAGGGAAGACTGC  
CCTATGGGTTGTAAACCTCTTTTGTACAGGGAGCAACGCCGGCTACGTGTAGCCGGACTGA  
GAGTACCT

>Consensus57 len=510 tot-seq=310

AGAGTTTGATCATGGCTCAGGATAAACGCTGGCGGCATGCCTAACACATGCAAGTCGAAC  
GGGGTTTATATAACAGAACTCTCCGGAGGGAAGTTATATAAACCTAGTGGCGGACGGGTG  
AGTAACGCGTGGGGAACCTGCCCTGTACCGGGGGACAACAGCCAGAAATGGCTGCTAATA  
CCGCATAATCCTGCGCTGCCGCATGGCAGCGCAGGGAAAACCTCCGGTGGTACAGGATGGT  
CCCGCGTCTGATTAGCTTGTGGCGGGGTAACGGCCACCAAGGCGACGATCAGTAGCCG  
GCTTGAGAGAGCGGACGGCCACATTGGGACTGAGACACGGCCAGACTCCTGCGGGAGGC  
AGCAGTGGGGAATATTGCACAATGGGGGAAACCCTGATGCAGCAATGCCGCGTGGGTGAA  
GAAGTACCCCGGTATGTAAAGCCCTGTCAGCAGGGAAGAAAATGACGGTACCTGACTAAG

AAGCCCCGGCTAACTACGTGCCAGCAGCCG  
>Consensus58 len=530 tot-seq=309  
AGAGTTTGATCATGGCTCAGGATGAACGCTAGCGACAGGCTTAACACATGCAAGTCGAGG  
GGCAGCGGGGGTGCAGGCTTGCCCTGCACCTGCCGGCGACCGGCGCACGGGTGAGTAACAC  
GTATGGAACCTGCCCCGCCACAGGGGATAACCCGGGAAACCCGGCCTAATACCCCATGC  
CGCCCGGACCGGGCATCCGGACCGGGCGAAAGGAGGAATCCGGTGGCGGCTGGGCATGCG  
GCGCATTAGCTTGACGGCGGGTAACGGCCACCGTGGCGACGATGCGTAGGGGTTCTGA  
GAGGAAGCCCCCCCCACACTGGAAGTGAACACGGTCCAGACTCCTACGGGAGGCAGCAG  
TGAGGAATATTGGTCAATGGGCGGAAGCCTGAACCAGCCAAGTCGCGTGAGGGAATAAGG  
CCCTACGGGTTCGTAAACCTCTTTTGGCGGGGAGCAAGGGCCGGGACGTGTCCCGGCCCGG  
AGAGTACCCGGAGAAAAAGCATCGGCTAACTCCGTGCCAGCAGCCGCGGT

>Consensus59 len=517 tot-seq=303  
AGAGTTTGATCATGGCTCAGGATGAACGCTGGCGGCGTGCTTAACACATGCAAGTCGAAC  
GAAGCGGTTACAGGGATTCCCTTCGGGGAGGAACGGTAATTGTCTGAGTGGCGGACGGGT  
GAGTAACGCGTGGGCAACCTGCCCCATACCGGGGGATAACAGCCGGAACGGCTGCTAAT  
ACCGCATAACCCAAGGAGGCTGCATAGCTTCCCTGGGGAAAACCTCCGGTGGTATGGGATGG  
GCCCGCTCTGATTAGCTCGTTGGCGGGTAACGGCCACCAAGGCGACGATCAGTAGCC  
GGCCTGAGAGGGCGGCCCGCCACATTGGGACTGAGACACGGCCAGACTCCTGCGGGAGG  
CAGCAGTGGGGAATATTGCACAATGGGGGAAACCTGATGCAGCGACGCCGCGTGAGCGA  
TGAAGTATCTCGGTATGTAAAGCTCTATCAGCAGGGAAGAAAGTGACAGTACCTGACTAA  
GAAGCCCCGGCTAACTACGTGCCAGCAGCCGCGGTAA

>Consensus60 len=502 tot-seq=301  
AGAGTTTGATCATGGCTCAGGATGAACGCTGGCGGCGTGCTTAACACATGCAAGTCGAGC  
GAAGCGTATTAGCGGAAGTTTTTCGGATGGAAGCGGATATGACTTAGCGGCGGACGGGTGA  
GTAACGCGTGGATAAACCTGCCTCATAAGGGGGATAACAGTTAGAAATGACTGCTAATAC  
CGCATAAGCGCACAGGACCGCATGGTCCGGTGTGAAAAACTCCGGTGGTATGGGATGGAT  
CCGCGTCTGATTAGCTGGTTGGTGAAGTAACGGCCACCAAGGCGACGATCAGTAGCCGA  
CCTGAGAGGGTGGCCGGCCACATTGGGACTGAGACACGGCCAAACTCCTACGGGAGGCA  
GCAGTGGGGAATATTGCACAATGGGGGAAACCTGATGCAGCAACGCCGCGTGAGTGAAG  
AAGTATTTCCGTATGTAAAGCTCTATCAGCAGGGAAGAAAGACGGTACCTGACTAAG  
AAGCCCCGGCTAACTACGTGCC

>Consensus61 len=521 tot-seq=297  
AGAGTTTGATCATGGCTCAGGATGAACGCTAGCGACAGGCTTAACACATGCAAGTCGAGG  
GGCAGCGGGGGCGAAAAGTTTGCTTTTCGCCTGCCGGCGACCGGCGCACGGGTGAGTAACAC  
GTATGGAACCTGCCCTATGCAGGGGGATAAGCGGAAGAAAATCCGTCTAATACCGCATAA  
CACCATTTGGAGACATCTCCAGGTGGTCAAAGGAGGCGACTCCGGCATAGGATGGCCATG  
CGTCGCATTAGCTAGTCGGCGGGGTAACGGCCACCGAGGCGACGATGCGTAGGGGTTCT  
GAGAGGAAGGTCCCCCACACTGGTACTGAGACACGGACCAGACTCCTACGGGAGGCAGCA  
GTGAGGAATATTGGTCAATGGGCGCAAGCCTGAACCAGCCAAGTCGCGTGAGGGAAAGACG  
GTCCTATGGATTGTAAACCTCTTTTGTGGGGAGCAAAGCGCGGTACGAGTACCGCGAAG  
GAGAGTACCCGAAGAAAAAGCATCGGCTAACTCCGTGCCAG

>Consensus62 len=494 tot-seq=294  
AGAGTTTGATCATGGCTCAGATTGAACGCTGGCGGAACGCTTTACACATGCAAGTCGAAC  
GGTAACAGCGAGGAAAGCTTGCTTTTTCGGCTGACGAGTGGCGAACGGGTGAGTAATAC  
ATCGGAACGTGTCCGCTCGTGGGGGACAACCATCCGAAAGGATGGCTAATACCGCATGAG  
TTCTACGGAAGAAAGAGGGGGACCTGCTTGACGGCCTCTCGCGAGCGGAGCGGCCGATGA  
CTGATTAGCCGGTTGGTGAAGTAACGGCTCACAAAGCAACGATCAGTAGCTGGTCTGAG  
AGGACGACCAGCCACACTGGGACTGAGACACGGCCAGACTCCTACGGGAGGCAGCAGTG  
GGGAATTTTGGACAATGGGCGCAAGCCTGATCCAGCTATTCGCGGTGTGGGATGACGGCC  
CTCGGGTTGTAAACCACTTTAGTAGAGAACGAAAAGGAGCTATCGAATAAATAGCTCTGC  
TGACGGTACTCTAA

>Consensus63 len=498 tot-seq=291  
AGAGTTTGATCATGGCTCAGGATGAACGCTGGCGGCGTGCCCTAACACATGCAAGTCGAAC  
GGGCGCGCCAATGGAAGCTTTTTCGGAGCGGAAATTGGCGCTGCCTAGTGGCGGACGGGT

GAGTAACGCGTGAGCAACCTGCCCTGCACTGGGGGACAACAGCTGGAAACGGCTGCTAAT  
ACCGCATAGGCGCACAGCCCCGCATGGGGCGGTGTGGAAAGTAATACGGTGCAGGATGGG  
CTCGCGTCTGATTAGCTTGTGGCGGGGCAACGGCTCACCAAGGCGACGATCAGTAGCCG  
GCCTGAGAGGGTGGACGGCCACATTGGGACTGAGACACGGCCCAGACTCCTACGGGAGGC  
AGCAGTGGGGGATATTGCACAATGGGGGGAACCCTGATGCAGCGACGCCGCGTGGGCGAT  
GGAGTACTTCGGTATGTAAAGCCCTATCAGCAGGGAAGAAAATGACGGTACCTGACTAAG  
AAGCCCCGGCTAAATACG

>Consensus64 len=499 tot-seq=289

AGAGTTTGCATCATGGCTCAGGACGAACGCTGGCGGCACGCCTAACACATGCAAGTCGAAC  
GGACGAGAGGAAGCTTCTCCTTGAGTTAGTGGCGGACGGGTGAGTAACACGTGAGCAA  
CCTGCCTCTGAGAGAGGGATAGCTTCTGGAAACGGATGGTAATACCTCATAACATATTTA  
AATCGCATGATTTGGATATCAAAGAAATTCGCTCAGAGATGGGCTCGCGTCTGATTAGAT  
AGTTGGTGGAGTAACGGCTCACCAAGTCGACGATCAGTAGCCGGACTGAGAGGTTGAACG  
GCCACATTGGGACTGAGACACGGCCCAGACTCCTACGGGAGGCAGCAGTGGGGAATATTG  
CACAATGGGGGGAACCCTGATGCAGCGATGCCGCGTGGAGGAAGAAGTTTTTCGGATTGT  
AAACTCCTTTTATCAGGGACGATAATGACGGTACCTGAAGAAAAGCTCCGGCTAACTAC  
GTGCCAGCAGCCGCGGTAA

>Consensus65 len=503 tot-seq=288

AGAGTTTGCATCCTGGCTCAGGATGAACGCTGGCGGCGTGCTTAACACATGCAAGTCGAAC  
GAAGCACTACCGACGGAACTTTTTCGGAGGGAAGATGGTAATGACTGAGTGGCGGACGGGT  
GAGTAACGCGTGGGCAACCTGCCCCATAGAGGGGGACAACAGCTGGAAACGGCTGCTAAT  
ACCGCATAACAAGGAGAGAGCGCATGTTCTTTTCTTCAAAGATTTATCGCTATGGGATGG  
ACCCGCGTCTGATTAGCTGGTTGGTGGAGTAACGGCTCACCAAGGCGACGATCAGTAGCC  
GGCTTGAGAGAGTGGACGGCCACATTGGGACTGAGACACGGCCCAGACTCCTACGGGAGG  
CAGCAGTGGGGAATATTGCACAATGGGGGGAACCCTGATGCAGCGACGCCGCGTGGAGTA  
AGAAGTATTTTCGGTATGTAAAGCTCTATCAGCAGGGAAGATAATGACGGTACCTGACTAA  
GAAGCCCCGGCTAACTACGTGCC

>Consensus66 len=519 tot-seq=279

AGAGTTTGCATCATGGCTCAGGATGAACGCTGGCGGCGTGCTTAACACATGCAAGTCGAAC  
GGAGATTATACGCAGAGGCGATTTTCGGTCAAATCATGTAAAATCTTAGTGGCGGACGGGT  
GAGTAACGCGTGGGTAACCTGCCTTACACTGGGGGATAACACTTAGAAATAGGTGCTAAT  
ACCGCATAAGCGCACGAAGCCGCATGGATTTGTGTGAAAAACTCCGGTGGTGTAAAGATGG  
ACCCGCGTCTGATTAGCTTGTGGCGGGGTAACGGCCCACCAAGGCGACGATCAGTAGCC  
GGCCTGAGAGGGTGGACGGCCACATTGGGACTGAGACACGGCCCAAACTCCTACGGGAGG  
CAGCAGTGGGGGATATTGGACAATGGGGGGAACCCTGATCCAGCGACGCCGCGTGGAGTA  
AGAAGTATTTTCGGTATGTAAAGCTCTGTGAGCAGGGAAGAAAGAAATGACGGTACCTGAC  
CAAGAAGCCCCGGCTAACTACGTGCCAGCAGCCGCGGTAA

>Consensus67 len=517 tot-seq=277

AGAGTTTGCATCATGGCTCAGGATGAACGCTAGCGACAGGCTTAACACATGCAAGTCGAGG  
GGCAGCGGGGAGCAGCAATGCTCCCGCCGGCGACCGGCGCACGGGTGAGTAACACGTAT  
GGAACCTGCCCGCAGCAGGGGGATAAGCGGAAGAAATTCGGTCTAATACCGCGTAACACC  
GCGGAGGGGCATCCCTCGGCGGTTAAAGATTCATCGGCTGCGGATGGCCATGCGGCGCAT  
TAGCTAGTCGGCGGGGTAACGGCCCACCGAGGCGACGATGCGTAGGGGTTCTGAGAGGAA  
GGTCCCCACACTGGTACTGAGACACGGACCAGACTCCTACGGGAGGCAGCAGTGAGGAA  
TATTGGTCAATGGCCGGGAGGCTGAACCAGCCAAGTCGCGTGAGGGAAGACGGCCCTACG  
GGTTGTAAACCTCTTTTGTGAGGGAGCAAGAGGCGGGTCGGGACCTGCTGTGAGAGTACC  
TGAAGAAAAGCATCGGCTAACTCCGTGCCAGCAGCC

>Consensus68 len=510 tot-seq=258

AGAGTTTGCATCCTGGCTCAGGACGAACGCTGGCGGCGGCCTAACACATGCAAGTCGAAC  
GGAGCTTATATTTTCAGAAAGTTTTTCGGATGGACGAGAGATAAGCTTAGTGGCGGACGGGTG  
AGTAACACGTGAGCAACCTGCCTTTCAGAGGGGGATAACAGTTGGAACGACTGCTAATA  
CCGCATAACGCTGCGATGGGGCATCCCGATGCAGCCAAAGGAGCAATCCGCTGGAAGATG  
GGCTCGCGGCCGATTAGCTAGTTGGTGGGGCAACGGCCCACCAAGGCGACGATCGGTAGC  
CGGACTGAGAGGTTGATCGGCCACATTGGGACTGAGACACGGCCCAGACTCCTACGGGAG

GCAGCAGTGGGGGATATTGCACAATGGAGGAACTCTGATGCAGCGACGCCGCGTGAGGG  
AAGACGGTCTTCGGATTGTAAACCTCTGTCTTTGGGGAAGAAAATGACGGTACCCAAAGA  
GGAAGCTCCGGCTAACTACGTGCCAGCAGC

>Consensus69 len=522 tot-seq=255

AGAGTTTGATCCTGGCTCAGGATGAACGCTAGCGACAGGCTTAACACATGCAAGTCGAGG  
GGCAGCGGGGGAGGAAGCTTGTCTTCTCCTGCCGGCGACCGGCGCACGGGTGAGTAACAC  
GTATGCAACCTGGCCGTCACAGGTGGATAACCGGAAGAAATCCGACTAATACAGCATAA  
CACTCCTGAGGGACATCCTTCGGGGGTCAAAGGAGGCGACTCCGGTGACGGATGGGCATG  
CGGCGCATTAGGTAGTTGGTAGGGTAACGGCCTACCAAGCCGACGATGCGTAGGGGTTCT  
GAGAGGAAGGTCCCCACATTGGAAGTGAAGACACGGTCCAACTCCTACGGGAGGCAGCA  
GTGAGGAATATTGGTCAATGGCCGGAAGGCTGAACCAGCCAAGTCGCGTGAGGGGAATAAG  
GCCCTATGGGTCGTAAACCTCTTTTGTTCAGGGAGCAAAGGCGTCCACGAGTGGACGAAAG  
GAGAGTACCTGAAGAAAAAGCATCGGCTAACTCCGTGCCAGC

>Consensus70 len=525 tot-seq=254

AGAGTTTGATCCTGGCTCAGGATGAACGCTAGCGACAGGCTTAACACATGCAAGTCGAGG  
GGCAGCGGGGGCGTAGCAATATGCCTGCCGGCGACCGGCGCACGGGTGAGTAACACGTAT  
GTAACCTGCCCTATGCAGGGGAATAACCCGGAGAAATCCGGCCTAATACCGCGTAACACC  
TTTCGGGAGCATTCTCTGGGAGGTTAAAGGAGAGATCCGGCATAGGATGGACATGCGTTCGC  
ATTAGGTAGACGGCGGGGTAACGGCCACCCTGCCGACGATGCGTAGGGGTTCTGAGAGG  
AAGGCCCCCACACTGGTACTGAGACACGGACCAGACTCCTACGGGAGGCAGCAGTGAGG  
AATATTGGTCAATGGCCGAGAGGCTGAACCAGCCAAGTCGCGTGAGGGGAAGAATGTCTTA  
AGGATTGTAAACCTCTTTTGTTCGGGAGCAAAGGCTCTGCGGAGTCGTATTGAGAGTA  
CCCGAAGAAAAAGCATCGGCTAACTCCGTGCCAGCAGCCGCGGTA

>Consensus71 len=512 tot-seq=239

AGAGTTTGATCCTGGCTCAGGATGAACGCTAGCGGCAGGCTTAACACATGCAAGTCGCGG  
GGCAGCGGGGGATGTAGCAATACATTCTGCCGGCGACCGGCGCAAGGGTGCGTAACCGCT  
GAGCAACATGCCCGTCTCAGGGGATAACCGGTGGAAACGCCGCTAATACCCCATGGCC  
ATATATTGAGGCATCTTGATATATCTAAAGCTCCGGCGGAGACGGATTGGCTCGCGTGAC  
ATTAGCTGGACGGCGGGGTAACGGCCACCCTGGCTACGATGTCTAGGGGTTCTGAGAGG  
AAGGTCCCCCACACTGGAAGTGAAGACACGGTCCAGACTCCTACGGGAGGCAGCAGTGAGG  
AATATTGGTCAATGGCCGAGAGGCTGAACCAGCCATGCCGCGTGAAGGCGAGTGCCCTAC  
GGCGTTAAACTTCTTTTGTTCGGGAGCAATAAGGGCCACGTGTGGCCCGATGAGAGTAC  
CGCACGAATAAGCATCGGCTAACTCCGTGCCA

>Consensus72 len=508 tot-seq=227

AGAGTTTGATCCTGGCTCAGGACGAACGCTGGCGGCGTGCTTAACACATGCAAGTCGAAC  
GGAGCACCCCTGAAGGAGTTTTTCGGACAACGGATGGGAATGCTTAGTGGCGGACTGGTGA  
GTAACGCGTGAGGAACCTGCCCTCCAGAGGGGGACAACAGTTGGAAACGACTGCTAATAC  
CGCATGATGCGTTGGAGCCGCATGACTCTGACGCCAAAAGATTTATCGCTGGAAGATGGCC  
TCGCGTCTGATTAGCTAGTTGGTGAAGTAACGGCCACCAGGCGACGATCAGTAGCCGG  
ACTGAGAGGTTGGCCGGCCACATTGGGACTGAGATACGGCCAGACTCCTACGGGAGGCA  
GCAGTGGGGAATATTGGGCAATGGGCGCAAGCCTGACCCAGCAACGCCGCGTGAAGGAAAG  
AAGGCTTTCGGGTTGTAAACTTCTTTTAAAGGGGAAGAGCAGAAGACGGTACCCCTTGAA  
TAAGCCACGGCTAACTACGTGCCAGCAG

>Consensus73 len=520 tot-seq=225

AGAGTTTGATCATGGCTCAGGATGAACGCTGGCGGCGTGCCCTAATACATGCAAGTCGAAC  
GCACCATTTTCGGTGGTGAGTGGCGAACGGGTGAGTAAAAGATAAGTAACCTGCCCTAGGC  
AGGGGGATAACGACCCGAAACGGACGCTAAAACCGCATAGGCTGGGAGATCGCATGAGAA  
TCCAGTTAAATGTCTGAAAGGGACAGGCAAAGGAGGGACTTATCACGCATTAGCTAGTT  
GGTGGGGCAACGGCCTACCAAGGCGACGATGCGTAGCCGGCCTGAGAGGGCGGACGGCCA  
CACTGGGACTGAGACACGGCCAGACTCCTACGGGAGGCAGCAGTAGGGAATTTTCGGCA  
ATGGGCGAAAGCCTGACCGAGCAACGCCGCGTGAACGAAGAAGTCTTCGGATTGTAAAG  
TTCTGTTATAGAGGAAGAACGGTGTACGTAGGAAATGACGTACAAGTGACGGTACTCTGT  
GAGGAAGCCACGGCTAACTACGTGCCAGCAGCCGCGGTA

>Consensus74 len=513 tot-seq=221

AGAGTTTGATCATGGCTCAGGATGAACGCTAGCGGCAGGCCTAACACATGCAAGTCGAGG  
GGCAGCGGGTAAGTAGCTTGCTACTTATGCCGGCGACCGGCGGACGGGTGCGTAACGCGT  
ATGTAACCTACCTTTGACAGGGGGATAACATCGAGAAAATTGGTACTAATACCCCATAA  
TCACCGGAGGCATCTTCGGTGGTTGAAAACCTCAGGTGGTCAGAGATGGACATGCGTTGTA  
TTAGCTAGTTGGTGAAGTAACGGCTCACCAAGGGCAGGATAACATAGGGGGACTGAGAGGT  
CAACCCCCACACTGGTACTGAGACACGGACAAACTCCTACGGGAGGCAGCAGTGAGGAA  
TATTGGTCAATGGACGCAAGTCTGAACCAGCCATGCCGCGTGACGGAAGACGGCTCTATG  
AGTTGTAAACTGCTTTTGTACGAGGGTAAATCCCCGATACGTGTATCGGGTTGAAAGTATC  
GTACGAATAAGGATCGGCTAACTCCGTGCCAGC

>Consensus75 len=515 tot-seq=221

AGAGTTTGATCATGGCTCAGGACGAACGCTGGCGGCGTGCTTAACACATGCAAGTCGAAC  
GGAGCACCCCTTGAAAGAGATTTTCGGTCAATGGATAGGAATGCTTAGTGGCGGACTGGTGA  
GTAACGCGTGAGGAACCTGCCTTCCAGAGGGGGACAACAGTTGGAAACGACTGCTAATAC  
CGCATGACACATGACCGTGGCATCACGGACATGTCAAAGATTTATCGCTGGAAGATGGCC  
TCGCGTCTGATTAGCTGGTAGGCGGGTAACGGCCCCACCTAGGCGACGATCAGTAGCCGG  
ACTGAGAGGTTGACCGGCCACATTGGGACTGAGATACGGCCCAGACTCCTACGGGAGGCA  
GCAGTGGGGAATATTGGGCAATGGGCGCAAGCCTGACCCAGCAACGCCGCGTGAAGGAAG  
AAGGCTTTCGGGTTGTAACCTTCTTTTAAGGGGGAAGAGGAGAAGACGGTACCCCTTGAA  
TAAGCCACGGCTAACTACGTGCCAGCAGCCGCGGT

>Consensus76 len=514 tot-seq=212

AGAGTTTGATCATGGCTCAGGACGAACGCTGGCGGCGTGCTTAACACATGCAAGTCGAAC  
GGAGCTATGCGCTGAACGGAGAGCAGCTTGCTGAAGGAAGTTCTTGTATAGCTTAGTGGC  
GGACGGGTGAGTAACGCGTGAGCAACCTGCCTTTCAGAGGGGGATAACGTTTGAAACGA  
ACGCTAATACCGCATAAGACCACACTTCCACATGGGAGAGGGGTCAAAGGAGCAATCCGC  
TGAAAGATGGGCTCGCGTCCGATTAGATAGTTGGGGGGTAACGGCCACCAAGTCGACGAT  
CGGTAGCCGGACTGAGAGGTTGAACGGCCACATTGGGACTGAGACACGGCCCAGACTCCT  
ACGGGAGGCAGCAGTGAGGGATATTGGTCAATGGGGGAAACCCTGAACCAGCAACGCCGC  
GTGAGGGAAGACGGTTTTTCGGATTGTAAACCTCTGTCTCTGTGAAGATAATGACGGTAG  
CAGAGGAGGAAGCTCCGGCTAACTACGTGCCAGC

>Consensus77 len=516 tot-seq=210

AGAGTTTGATCATGGCTCAGGATGAACGCTGGCGGCGTGCTTAACACATGCAAGTCGAAC  
GGAGATAAACCGGCGAAGAGATTTTCGGTGCATTCTGTTTATCTTAGTGGCGGACGGGTGA  
GTAACGCGTGGGTAACCTGCCCTGTACAGGGGGATAACACTTAGAAATAGGTGCTAAAAAC  
CGCATAAGCGCACAGTACCGCATGGTACAGTGTGAAAAACTCCGGTGGTACAGGATGGAC  
CCGCGTCTGATTAGCTGGTTGGAGGGGTAACGGCCCCACCAAGGCGACGATCAGTAGCCGG  
CCTGAGAGGGTGAACGGCCACATTGGGACTGAGACACGGCCCCAACTCCTACGGGAGGCA  
GCAGTGGGGAATATTGCACAATGGGGGAAACCCTGATGCAGCGACGCCGCGTGAGTGAAG  
AAGTATTTTCGGTATGTAAAGCTCTATCAGCAGGGAAGATAATGACGGTACCTGAGTAAGA  
AGCCCCGGCTAACTACGTGCCAGCAGCCGCGGTAAT

>Consensus78 len=514 tot-seq=209

AGAGTTTGATCCTGGCTCAGGATGAACGCTGGCGGCGTGCTTAACACATGCAAGTCGAGC  
GAAGCGCGCCCCGGAATCCTTCGGGAGGAAGGGTCGCGACTGAGCGGCGGACGGGTGAGT  
AACGCGTGGGCAACCTGCCCCATACAGGGGGACAACGGCCGGAACGGCCGCTAATACCG  
CATGATTCCTCTTGGCCGATGGCCGGGAGGGGAAAGCCGAGACGGTATGGGATGGACCC  
GCGTCTGATTAGCTGGTTGGCGAGGTAACGGCTCACCAAGGCGACGATCAGTAGCCGGCC  
TGAGAGGGCGACCGGCCACATTGGGACTGAGACACGGCCCCAACTCCTACGGGAGGCAGC  
AGTGGGGAATATTGCACAATGGGGGAAACCCTGATGCAGCGACGCCGCGTGAAGGACGAA  
GTATTTTCGGTACGTAAACTTCTATCAGCAGGGAAGAAAAATGACGGTACCTGACCAAGAAG  
CCCCGGCTAACTACGTGCCAGCAGCCGCGGTAAT

>Consensus79 len=527 tot-seq=204

AGAGTTTGATCCTGGCTCAGGATGAACGCTAGCGGCAGGCTTAACACATGCAAGTCGAAG  
GGCAACGGGGAGAGTGCTTGCACTCTCTGCCGGCGACTGGCGCACGGGTGAGTAACACGT  
ATGCAACCTGCCCTCCACAGGGGGACAACCTTCCGAAAGGGAGGCTAATCCCGCGTATAT  
CCCTTGGGGGCATCCTTGGGGGAGGAAAGGATTACCGGTGGAGGATGGGCATGCGGCGCA

TTAGGCAGTAGGCGGGGTAACGGCCCACCTAACCGACGATGCGTAGGGGTTCTGAGAGGA  
AGGTCCCCCACACTGGTACTGAGACACGGACCAGACTCCTACGGGAGGCAGCAGTGAGG  
AATATTGGTCAATGGGCGGGAGCCTGAACCAGCCAAGCCGCGTGAAGGAAGAAGGCGCCA  
AGCGTCGTAAACTTCTTTTGTCTGGGGAACAAAGGGCGCCACGTGTGGCGTTGTGAGTGTA  
CCCGAAGAAAAAGCATCGGCTAACTCCGTGCCAGCAGCCGCGGTAAT

>Consensus80 len=526 tot-seq=204

AGAGTTTGATCATGGCTCAGGATGAACGCTAGCGGCAGGCTTAACACATGCAAGTCGAGG  
GGCATCGGGAGGGAAGCTTGCTTTCCTTGCCGGCGACCGGCGCACGGGTGAGTAACACGT  
ATGCAACCTGCCCTCTTCAGGGGGACAACCTTCCGAAAGGGAGGCTAATCCCGCGTATAT  
CGGTTTCGGGCATCCGAGATCGAGGAAAGATTTCATCGGAAGAGGATGGGCATGCGGCGCA  
TTAGCTTGACGGCGGGGTAACGGCCCACCGTGGCGACGATGCGTAGGGGTTCTGAGAGGA  
AGGTCCCCCACACTGGTACTGAGACACGGACCAGACTCCTACGGGAGGCAGCAGTGAGGA  
ATATTGGTCAATGGGAGAGATCCTGAACCAGCCAAGCCGCGTGAGGGAAGACGGCCCTAT  
GGGTTGTAAACCTCTTTTGTCTGGGAGAACAAAACCCGGGACGAGTCCCGGACTGCGTGAT  
CCGAAGAAAAAGCATCGGCTAACTCCGTGCCAGCAGCCGCGGTAAT

>Consensus81 len=528 tot-seq=201

AGAGTTTGATCATGGCTCAGGATGAACGCTAGCGACAGGCTTAACACATGCAAGTCGAGG  
GGCAGCGGGGCGGCAGGCTTGCCCTGCCGTTGCCGGCGACCGGCGCACGGGTGAGTAACAC  
GTATGCAACCTGCCCCTGGCAGGGGGATAAGCGGGGGAAACCCCGTCTAATACCGCGTAA  
CGCGGCCTAGGGACATCCCAAGGCCGCCAAAGGGAGCAATCCCGGCCACGGATGGGCATG  
CGGCGCATTAGCTAGTCGGCGGGGTAACGGCCCACCGAGGCGACGATGCGTAGGGGTTCT  
GAGAGGAAGGCCCCCACACTGGTACTGAGACACGGACCAGACTCCTACGGGAGGCAGCA  
GTGAGGAATATTGGTCAATGGGCGCGAGCCTGAACCAGCCAAGTCGCGTGAGGGATGACG  
GCCCTACGGGTTGTAAACCTCTTTTGTCTGGGAGCAACGGGCGTCACGTGTGGCGCCACT  
GAGAGTACCCGGAGAAAAAGCATCGGCTAACTCCGTGCCAGCAGCCGCG

>Consensus82 len=517 tot-seq=196

AGAGTTTGATCCTGGCTCAGGATGAACGCTGGCGGCGTGCCTAACACATGCAAGTCGAAC  
GGGCGCGCCCGGCTGAGGCCCTTCGGGGCGGAAGTTGGCGCCGCCAGTGGCGGACGGGT  
GAGTAACGCGTGGGCAACCTACCCCGCACTGGGGGACAACAGCCGGAAACGGCTGCTAAT  
ACCGCATGGGCGCCACGCCCGCATGGGGCGAGGCGGAAAGCCTTGGCGGTGCGGGATGG  
GCCC GCGTCTGATTAGCTTGTTGGCGGGGCAACGGCCCACCAAGGCGACGATCAGTAGCC  
GGCCTGAGAGGGTGGGCGGCCACATTGGGACTGAGACACGGCCCAAACCTCCTACGGGAGG  
CAGCAGTGGGGGATATTGCACAATGGGGGAAACCTGATGCAGCGACGCCGCGTGGGCGA  
TGGAGCGCCTCGGCGCGTAAAGCCCTATCAGCAGGGAAGAAGATGACGGTACCTGACTAA  
GAAGCCCCGGCTAAATACGTGCCAGCAGCCGCGGTAA

>Consensus83 len=519 tot-seq=194

AGAGTTTGATCATGGCTCAGGATGAACGCTAGCGACAGGCTTAACACATGCAAGTCGAGG  
GGCAGCGGGGATAAAGCTTGCTTTATCTGCCGGCGACCGGCGCACGGGTGAGTAACACGT  
ATGCAACCTGCCCTTTGCAGGGGGATAACCGGAAGAAATTCGACTAATACCGCATAATA  
CTTTCCGGAGACATCTCCGGGGATTCAAAGGAAGCAATTCGGGCAAAGGATGGGCATGCG  
TCGCATTAGCTAGTCGGCGGGGTAACGGCCCACCGAGGCGACGATGCGTAGGGGTTCTGA  
GAGGAAGGCCCCCACACTGGTACTGAGACACGGACCAGACTCCTACGGGAGGCAGCAGT  
GAGGAATATTGGTCAATGGGCGAAAGCCTGAACCAGCCAAGTCGCGTGAGGGAAGACGGT  
CCTATGGATTGTAAACCTCTTTTGTCTGGGAGCAATGCAGGCCTTGCAGGCCTGAGGGA  
GAGTACCCGGAGAAAAAGCATCGGCTAACTCCGTGCCAG

>Consensus84 len=495 tot-seq=192

AGAGTTTGATCATGGCTCAGGATAAACGCTGGCGGCGCACATAAGACATGCAAGTCGAAC  
GGACTTAACTCATTCTTTTAGATTGAGAGCGGTTAGTGGCGGACTGGTGAGTAACACGTA  
AGCAACCTGCCTATCAGAGGGGAATAACAGTGAGAAATCATTGCTAATACCGCATAAGCT  
AGTAGTATCGCATGATATAGCTAGAAAAGGAGCAATCCGCTGATAGATGGGCTTGCGTCT  
GATTAGCTAGTTGGTGGGGTAACGGCCTACCAAGGCGACGATCAGTAGCCGGACTGAGAG  
GTTGAACGGCCACATTGGGACTGAGATACGGCCCAGACTCCTACGGGAGGCAGCAGTCGG  
GAATATTGCGCAATGGAGGAAACTCTGACGCAGTGACGCCGCGTATAGGAAGAAGGTTTT  
CGGATTGTAAACTATTGTCGTGAGGGAAGAAATTGACAGTACCTCAGGAGGAAGCTCCG

CTAACTATGTGCCCC

>Consensus85 len=518 tot-seq=187

AGAGTTTGCATCATGGCTCAGGATGAACGCTAGCGACAGGCTTAACACATGCAAGTCGAGG  
GGCAGCGGTGTTGGAGGCTTGCCTTCAACAGCCGGCGACCGGCGCACGGGTGAGTAACAC  
GTATGCAACCTGGCCGTCACAGGAGGATAACCGGTAGAAATGCCGCCTAATACTCCATAA  
TACTTGTAGAGGACATCCTCTGGGTGTCAAAGGAATTTATTCGGTGACGGATGGGCATG  
CGGCGCATTAGCTAGTCGGCGGGGTAACGGCCACCGAGGCGACGATGCGTAGGGGTCT  
GAGAGGAAGGTCCCCACATTGGAAGTGTGAGACACGGTCCAACTCCTACGGGAGGCAGCA  
GTGAGGAATATTGGTCAATGGGCGGAAGCCTGAACCAGCCAAGTCGCGTGAGGGATTAAG  
GCCCTATGGGTGTAACCTCTTTTGTGAGGGAGCAATGGCGTCCACGTGTGGGCGTATG  
GAGAGTACCTGAAGAAAAAGCATCGGCTAACTCCGTGC

>Consensus86 len=522 tot-seq=181

AGAGTTTGCATCATGGCTCAGGATGAACGCTAGCGACAGGCTTAACACATGCAAGTCGAGG  
GGCAGCGGAGGCGAGTGCTTGCCTTGCAGACGGCGACCGGCGCACGGGTGAGTAACAC  
GTATGCGACCTGCCCCTAGCAGGGGATAAGCGGAAGAAATTCGGTCTAATACCGCGTAA  
TATCTTTCGGGGGCATCCCTGAGGGATTAAGGAAGCGATTCCGGCTACGGATGGGCATG  
CGGCGCATTAGCTAGTCGGCGGGGTAACGGCCACCGAGGCGACGATGCGTAGGGGTCT  
GAGAGGAAGGTCCCCACACTGGTACTGAGACACGGACCAGACTCCTACGGGAGGCAGCA  
GTGAGGAATATTGGTCAATGGGCGAGAGCCTGAACCAGCCAAGTCGCGTGAGGGGAAGACG  
GTCTATGGATTGTAAACCTCTTTTGTGAGGGAGCAAAAAGGCCTCGTGAGGCCACAAGT  
GAGAGTACCCGAAGAAAAAGCATCGGCTAACTCCGTGCCAGC

>Consensus87 len=516 tot-seq=177

AGAGTTTGCATCCTGGCTCAGGATGAACGCTAGCGACAGGCTTAACACATGCAAGTCGAGG  
GGCAGCGGGGAAGTGGAACACTTCTGCCGGCGACCGGCGCACGGGTGAGTAACACGTAT  
GCAACCTGCCCTATGCAGGGGAATAATCCGGAGAAATCCGGTCTAATACCGCATAACACC  
TTCAGGGGACATCCCCTTTGGGTAAAGGAAGCAATTCCGGCATAGGATGGGCATGCGGC  
GCATTAGCTTGTGGTGAGGTAACGGCTCACCAAGGCGACGATGCGTAGGGGTCTGAGA  
GGAAGGTCCCCACACTGGTACTGAGACACGGACCAGACTCCTACGGGAGGCAGCAGTGA  
GGAATATTGGTCAATGGGCGAGAGCCTGAACCAGCCAAGTCGCGTGAGGGGAAGACGGTCC  
TATGGATTGTAAACCTCTTTTGTGAGGGAGCAATAAGACCACGTGTGGTCTAAAGTGAGA  
GTACCCGAAGAAAAAGCATCGGCTAACTCCGTGCCA

>Consensus88 len=508 tot-seq=174

AGAGTTTGCATCCTGGCTCAGGATGAACGCTGGCGGCGTGCTTAACACATGCAAGTCGAAC  
GAAGCATTTTAAATGAGACTTTCGGGTGGATTTTAAAAATGACTGAGTGGCGGACGGGTGA  
GTAACGCGTGGGCAACCTGCCCTTACACAGGGGGACAACAGTTAGAAATGACTGCTAATAC  
CGCATAAGCGCACGGGAACGCATGTTTCTGTGTGAAAAACTCCGGTGGTGTAAGATGGGC  
CCGCGTTGGATTAGGTAGTTGGTGAGGTAACGGCTCACCAAGCCGACGATCCATAGCCGA  
CCTGAGAGGGTGACCGGCCACATTGGGACTGAGACACGGCCCAAACCTCCTACGGGAGGC  
GCAGTGGGGAATATTGCACAATGGGCGCAAGCCTGATGCAGCGACGCCGCGTGAGCGAAG  
AAGTATTTCCGTATGTAAAGCTCTATCAGCAGGGAAGAAAAATGACGGTACCTGACTAAGA  
AGCTCCGGCTAAATACGTGCCAGCAGCC

>Consensus89 len=516 tot-seq=174

AGAGTTTGCATCATGGCTCAGGATGAACGCTGGCGGCGTGCTTAACACATGCAAGTCGAAC  
GGGTCTTAGTGCGGAAGTTTTCGGATGGAAGGATTAAGACTTAGTGGCGGACGGGTGAG  
TAACGCGTGGGTAACCTGCCCTGTACAGGGGGATAACAGTTGAAAACGGCTGCTAAAACC  
GCATAACATGGAGATACCGCATGATATTTCCATCAAATATTTATAGGTACAGGATGGGCC  
CGCGTCTGATTAGCCAGTTGGCAGGGTAATGGCCTACCAAAGCGACGATCAGTAGCCGGC  
TTGAGAGAGTGACCGGCCACATTGGGACTGAGACACGGCCCAAACCTCCTACGGGAGGCAG  
CAGTGGGGGATATTGCACAATGGGGGAAACCCTGATGCAGCGACGCCGCGTGAGTGAAGA  
AGTATTTCCGTATGTAAAGCTCTATCGGCAGGGAAGAAAAATGACAGTACCTGACTAAG  
AAGCCCCGGCTAACTACGTGCCAGCAGCCGCGGTAA

>Consensus90 len=522 tot-seq=171

AGAGTTTGCATCATGGCTCAGGATGAACGCTAGCGACAGGCTTAACACATGCAAGTCGAGG  
GGCAGCGGGGAGTAAGCTTACTTCTGCCGGCGACCGGCGCACGGGTGAGTAACAC



GTATGCAACCTGCCCCGTACAGGGGGATAATCGGAAGAAATTCGGTCTAATACCGCGTGA  
CAACACCGAGAGGCATCTTTTGGTGTCAAAGGAAGCAATTCGGTGACGGATGGGCATG  
CGTCGCATTAGCTAGTCGGCGGGGTAACGGCCACCGAGGCGACGATGCGTAGGGGTCT  
GAGAGGAAGCCCCCACACTGGTACTGAGACACGGACCAGACTCCTACGGGAGGCAGCA  
GTGAGGAATATTGGTCAATGGGCTAAGGCCTGAACCAGCCAAGTCGCGTGAGGGAAAGACG  
GTCCTATGGATTGTAAACCTCTTTTGTGCGGGGAGCAACGAGGCCACGTGTGGCCGAAGTG  
AGAGTACCCGAAGAAAAAGCATCGGCTAACTCCGTGCCAGCA

>Consensus91 len=519 tot-seq=171

AGAGTTTGTATCATGGCTCAGGATGAACGCTAGCGACAGGCTTAACACATGCAAGTCGAGG  
GGCAGCGGGGGTGATGGCTTGCCATCACCTGCCGGCGACCGGCGCACGGGTGAGTAACAC  
GTATGCAACCTGCCCCGCACAGGGGGATAAGCGGAAGAAATTCGGTCTAATACCGCGTGA  
CGCGGCGCCGGGGCATCCCGGTGCCGCCAAAGGGATTACCGGTGGCGGATGGGCATGCGG  
CGCATTAGCTAGTCGGCGGGGTAACGGCCACCGAGGCGACGATGCGTAGGGGTCTTGAG  
AGGAAGGTCCCCCACACTGGTACTGAGACACGGACCAGACTCCTACGGGAGGCAGCAGTG  
AGGAATATTGGTCAATGGGCGCGAGCCTGAACCAGCCAAGTCGCGTGAGGGATGACGGTC  
CTACGGATTGTAAACCTCTTTTGCCGGGGAGCAAGCGTGCGTTCGTGAACGCGCGTCGAG  
AGTACCCGGAGAAAAAGCATCGGCTAACTCCGTGCCAGC

>Consensus92 len=510 tot-seq=167

AGAGTTTGTATCATGGCTCAGGATGAACGCTGGCGGCGTGCTTAACACATGCAAGTCGAAC  
GGACTCATATTGAAACCTAGTGATGTATGAGTTAGTGGCGGACGGGTGAGTAACGCGTGG  
AGAACCTGCCGTATACTGGGGGATAACACTTAGAAATAGGTGCTAATACCGCATAAGCGC  
ACAGCTTCGCATGAAGCAGTGTGAAAACAAAAAGCTAAAGCTTTTGGTGGTATACGATG  
GATCCGCGTCTGATTAGCTTGTGGCGGGGTAAAGGCCACCAAGGCGACGATCAGTAGC  
CGCCCTGAGAGGGTGAACGGCCACATTGGGACTGAGACACGGCCAAACTCCTACGGGAG  
GCAGCAGTGGGGAATATTGCACAATGGGGGAAACCCTGATGCAGCGACGCCGCGTGAGTG  
AGAAGTATTTTCGGTACGTAAAGCTCTATCAGCAGGGAAGAAAATGACGGTACCTGACTA  
AGAAGCCCCGGCTAACTACGTGCCAGCAGC

>Consensus93 len=531 tot-seq=167

AGAGTTTGTATCATGGCTCAGGATGAACGCTAGCGACAGGCTTAACACATGCAAGTCGAGG  
GGCAGCGGGGGCGAAGCTTGCTTCGCCTGCCGGCGACCGGCGCACGGGTGAGTAACACGT  
ATGCGACCTGCCCCCGCAGGGGGATAACCGGGAGAAAATCCCGACTAATACCGCGTAACG  
CCGCGGGGCTGCATGGCCCCGCGGCCAAAGGAAGCGATTCCGGCGGGGGATGGGCATGCG  
GCGCATTAGCTAGTCGGCGGGGTAACGGCCACCGAGGCGACGATGCGTAGGGGTCTTGA  
GAGGAAGGTCCCCCACACTGGTACTGAGACACGGACCAGACTCCTACGGGAGGCAGCAGT  
GAGGAATATTGGTCAATGGGCGGGAGCCTGAACCAGCCAAGTCGCGTGAGGGAAAGACGGT  
CCTACGGATTGTAAACCTCTTTTGCCGGGGAGCAACGGGGTCTTTCGAGGGGCCAATGA  
GAGTACCCGGAGAAAAAGCATCGGCTAACTCCGTGCCAGCAGCCGCGGTAA

>Consensus94 len=521 tot-seq=165

AGAGTTTGTATCATGGCTCAGGATGAACGCTAGCGGCAGGCTTAACACATGCAAGTCGAGG  
GGCAGCGAGTAGATTGCTTGCAATCTACGTGCGCGACCGGCGCACGGGTGCGTAACGCGT  
ATGCAACCTACCCATTACAGGGGGATAACACTGAGAAAATCGGTACTAATACCCCATAAAC  
TCCAGGGAGGCATCTTCTTGGGTGAAAACCTCCGGTGGTAATGGATGGGCATGCGTTGTA  
TTAGTTAGTTGGTGGGGTAACGGCTCACCAAGACGACGATACATAGGGGGACTGAGAGGT  
TAACCCCCACACATTGTTACTGAGACACGGACAAACTCCTACGGGAGGCAGCAGTGAGG  
AATATTGGTCAATGGACGCAAGTCTGAACCAGCCATGCCGCGTGACAGGAAGACGGCTCTA  
TGAGTTGTAAACTGCTTTTGTACGAGGGTAAACGCAGATACGTGTATCTGTCTGAAAAGTA  
TCGTACGAATAAGGATCGGCTAACTCCGTGCCAGCAGCCGCGGTA

>Consensus95 len=518 tot-seq=162

AGAGTTTGTATCATGGCTCAGGACGAACGCTGGCGGCGTGCTTAACACATGCAAGTCGAAC  
GGAGCACCCCTGAAGGAGTTTTCGGACAACGGAAGGGAAATGCTTAGTGGCGGACTGGTGA  
GTAACGCGTGAGGAACCTGCCTTTCGGAGGGGGACAACAGTTGGAACGACTGCTAATAC  
CGCATGATACATCGGGGTCGCATGGTCTTGATGTCAAAGATTTATCGCCGAAAGATGGCC  
TCGCGTCTGATTAGCTAGTTGGTGGGGTAACGGCCACCAAGGCGACGATCAGTAGCCGG  
ACTGAGAGGTTGGCCGGCCACATTGGGACTGAGATACGGCCACAGACTCCTACGGGAGGCA

GCAGTGGGGAATATTGGGCAATGGACGCAAGTCTGACCCAGCAACGCCGCGTGAAGGAAG  
AAGGCTTTCGGGTTGTAAACTTCTTTTAAGGGGAAGAGCAGAAGACGGTACCCCTTGAA  
TAAGCCACGGCTAACTACGTGCCAGCAGCCGCGGTAAT

>Consensus96 len=492 tot-seq=156

AGAGTTTGATCATGGCTCAGGACGAACGCTGGCGGCATGCCTAACACATGCAAGTCGAAC  
GAGGATAGCAATATCCTAGTGGCGAACGGGTGAGTAACGCGTGAGCAACCTGCCTCATA  
AACGGGATACCCGAGGGAACTTCGGTTAATACGGTATAAGACCACACTACCGCATGGTA  
GGGGTAAAAGGAGAAATCCGGTATGAGATGGGCTCGCGTCGCATTAGCTAGTTGGTGAG  
GTAACGGCCACCAAGGCGACGATGCGTAGCCGACCTGAGAGGGTATCGGCCACATTGG  
GACTGAGATACGGCCAGACTCCTACGGGAGGCAGCAGTGGGGAATATTGGGCAATGGAG  
GAACTCTGACCCAGCAATGCCGCGTGAATGAAGAAGGTCTTCGGATTGTAAAGTTCTTT  
AGTCAGGGAAGAATAAAATGACGGTACCTGAAGAATAAGCTCCGGCTAACTACGTGCCAG  
CAGCCGCGGTAA

>Consensus97 len=540 tot-seq=154

AGAGTTTGATCATGGCTCAGGATGAACGCTGGCGGCGTGCCTAACACATGCAAGTCGAAC  
GGGGCCAGCGCGGAAGGGGATGGTTTACCAGACCCGGAAGGCGGGCCCTGAGTGGCG  
GACGGGTGAGTAACGCGTGGGGAACCTGCCCCGTACCGGGGATAACACCTGGAAACAGG  
TGCTAATACCGCATAACAGAAGGGGACGCATGTTCCCTTTCTTGAAAACCTCCGGTGGTACG  
GGATGGACCCGCGTCTGATTAGCTGGTTGGCGGGGTAACGGCCACCAAGGCGACGATCA  
GTAGCCGGCCTGAGAGGGCGGACGGCCACATTGGGACTGAGACACGGCCAAACTCCTAC  
GGGAGGCAGCAGTGGGGAATATTGCACAATGGGGGAAACCCTGATGCAGCGACCCGCGT  
GAGTGAAGAAGCGTTTCGGCGCGTAAAGCTCTGTGACGGGGAAGAAACACGGTTCGCGA  
GAGCCGCGGACGGTACCCGACCAAGAAGCCCCGGCTAACTACGTGCCAGCAGCCGCGGTA

>Consensus98 len=488 tot-seq=150

AGAGTTTGATCCTGGCTCAGAACGAACGCTGGCGGCAGGCTTAACACATGCAAGTTGAAC  
GGTATTTGTATGGTGCTTGCACTAGACAAAGAGAGTAGCGCACTGGTGAGTAACACGTGG  
GAACGTACCTTGAAGTGGGGAATAGCGTCTGGAAACGGACGATAATACCGCATAATCCCT  
GAGGGGAAAGATTTATCGCTTTAAGAACGGCCCCGCGGAAGATTAGGTAGTTGGTGGGGT  
AAAGGCCTACCAAGCCTACGATCTATAGCTGGTCTGAGAGGACGATCAGCCACATTGGAA  
CTGAGACACGGTCCAAACTCCTACGGGAGGCAGCAGTGAAGGAATATTGGGCAATGGAGGC  
AACTCTGACCCAGCCATGCCGCGTGAAGTGAAGAAGGTTTTTCGGATTGTAAAGCTCTTTTCG  
GATGTGACGATGATGACGGTAGCATCTAAAGAAGCCCCGGCTAACTTCGTGCCAGCAGCC  
CGGTAAT

>Consensus99 len=506 tot-seq=145

AGAGTTTGATCCTGGCTCAGGACGAACGCTGGCGGCGCGCCTAACACATGCAAGTCGAAC  
GGGACCATTTTAGAGTTTACTTTGGGATGGTTTAGTGGCGGACGGGTGAGTAACACGTGA  
GCAACCTACCTTTAGAGGGGGATAACAGTTGGAAACGACTGCTAATACCGCATAACGTT  
GTAAAAGGGCATCCATTTACAACAAAAGAGAAATCTGCTGAAAGATGGGCTCGCGGCCG  
ATTAGATAGTAGGCGGGGTAACGGCCACCTAGTCAACGATCGGTAGCCGGACTGAGAGG  
TTGAACGGCCACATTGGGACTGAGACACGGCCAGACTCCTACGGGAGGCAGCAGTGGGG  
GATATTGCACAATGGGCGAAAGCCTGATGCAGCGACCCGCGTGAGGGAAGACGGTCTTC  
GGATTGTAAACCTCTGTCTTTGGGGAAGAAATCAGACGGTACCCAAAGAGGAAGCTCCGG  
CTAACTACGTGCCAGCAGCCGCGGTA

>Consensus100 len=506 tot-seq=144

AGAGTTTGATCATGGCTCAGGATGAACGCTAGCTACAGGCTTAACACATGCAAGTCGAGG  
GGCAGCATGAACTTAGCTTGCTAAGTTTGATGGCGACCGGCGCACGGGTGAGTAACACGT  
ATCCAACCTGCCGATGACTCGGGGATAGCCTTTTCGAAAAGAAAGATTAATACCCGATGGCA  
TAGTTCCTCCGCATGGTAGGACTATTAAGAATTTTCGGTCATCGATGGGGATGCGTTCCA  
TTAGCTTGTTGGCGGGGTAACGGCCACCAAGGCATCGATGGATAGGGGTTCTGAGAGGA  
AGGTCCCCACATTGGAACGAGACACGGTCCAAACTCCTACGGGAGGCAGCAGTGAAGGA  
ATATTGGTCAATGGGCGCTAGCCTGAACCAGCCAAGTAGCGTGAAGGATGACTGCCCTAT  
GGTTGTAAACTTCTTTTATATGGGAATAAAGTGCAGTATGTATACTGCTTTGCATGTAC  
CTTATGAATAAGGATCGGCTAACTCC

>Consensus101 len=512 tot-seq=142

AGAGTTTGATCATGGCTCAGGATGAACGCTAGCGACAGGCTTAACACATGCAAGTCGAGG  
GGCAGCGGGGTGTAGCAATACGCCGCCGGCGACCGGGTGAGTAACGCGTATGC  
AACTTGCCTATCAGAGGGGGATAACCCGGCGAAAGTCGGACTAATACCGCATGAAGCAGG  
GATCCCGCATGGGAATATTTGCTAAAGATTCATCGCTGATAGATAGGCATGCGTTCCATT  
AGGCAGTTGGCGGGGTAACGGCCCACCAACCGACGATGGATAGGGGTTCTGAGAGGAAG  
GTCCCCCACACTGGTACTGAGACACGGACCAGACTCCTACGGGAGGCAGCAGTGAGGAAT  
ATTGGTCAATGGGCGGAGCCTGAACCAGCCAAGTCGCGTGAGGGATGAAGGATCTATGG  
TTCGTAAACCTCTTTTATAAGGGAATAAAGTGTAGGACGTGTCCTGTTTTGTATGTACCT  
TATGAATAAGGATCGGCTAACTCCGTGCCAGC

>Consensus102 len=522 tot-seq=141

AGAGTTTGATCATGGCTCAGGATGAACGCTGGCGGCGTGCCTAACACATGCAAGTCGAAC  
GGGGTACCCTTGACAGAGGCTTCGGCCAATTGATAGGAATACCTAGTGGCGGACGGGTGA  
GTAACGCGTGAGGAACCTGCCTTGGAGTGGGGAATAACAGTTAGAAATAGCTGCTAATAC  
CGCATAATGCAACTAAGTCGCATGGCTTTGGTTGCCAAAGATTTATCGCTCTAAGATGGC  
CTCGCGTCTGATTAGATAGTTGGCGGGGTAACGGCCCACCAAGTCGACGATCAGTAGCCG  
GACTGAGAGGTTGGCCGGCCACATTGGGACTGAGACACGGCCCAGACTCCTACGGGAGGC  
AGCAGTGGGGAATATTGGGCAATGGGCGCAAGCCTGACCCAGCAACGCCGCGTGAAGGAA  
GAAGGCCCTCGGGTTGTAAACTTCTTTTATTTCGGGACGAAACAAATGACGGTACCGAATG  
AATAAGCCACGGCTAACTACGTGCCAGCAGCCGCGGTAATTT

>Consensus103 len=490 tot-seq=136

AGAGTTTGATCATGGCTCAGGACGAACGCTGGCGGCGTGCCTAACACATGCAAGTTGAGC  
GGAGATATATGGAGCTTGCTTTATATAACTTAGCAGCGAACGGGTGAGTAACACGTAGAT  
AATCTATCTATACTGGGGGATAGCCGATGAAAGTTGGATTAATACCGCATATAGCTAT  
ATAGTTGCATGATTATGTAGTAAAAGATTTATTGGTATAGGAGGAGTCTGCGGCACATTA  
GCTAGTAGGTGAGGTAAAGGCTTACCTAGGCGACGATGTGTAGCCGGTCTGAGAGGATGA  
ACGGCCACAATGGAAGTGGAGACACGGTCCATACTCCTACGGGAGGCAGCAGTGGGGAATA  
TTGCACAATGGGGGAAACCTGATGCAGCAACGCCGCGTGAGTGAAGAAGGTTTTTCGGAT  
TGTAAGCTCTGTTAGCAGGGAAGAGGAAGGACGGTACCTGCAGAGGAAGCCACGGCTAA  
CTACGTGCCA

>Consensus104 len=520 tot-seq=136

AGAGTTTGATCCTGGCTCAGGATGAACGCTGGCGGCGTGCCTAACACATGCAAGTCGAGC  
GAACAGATAAGGAGCTTGCTCCTTTGAAGTTAGCGGCGGACGGGTGAGTAACACGTGGGT  
AACCTACCTATAAGACTGGGATAACTTCGGGAAACCGGAGCTAATACCGGATAACATTTA  
GAACCGCATGGTTCTAAAGTGAAAGATGGTTTTGCTATCACTTATAGATGGACCCGCGCC  
GTATTAGCTAGTTGGTAAGGTAACGGCTTACCAAGGCGACGATACGTAGCCGACCTGAGA  
GGGTGATCGGCCACACTGGAAGTGGAGACACGGTCCAGACTCCTACGGGAGGCAGCAGTAG  
GGAATCTTCCGCAATGGGCGAAAGCCTGACGGAGCAACGCCGCGTGAGTGATGAAGGGTT  
TCGGCTCGTAAACTCTGTTATTAGGGAAGAACAATGTGTAAGTAACTGTGCACATCTT  
GACGGTACCTAATCAGAAAAGCCACGGCTAACTACGTGCCA

>Consensus105 len=507 tot-seq=132

AGAGTTTGATCATGGCTCAGGATGAACGCTGGCGGCGTGCCTAACACATGCAAGTCGAAC  
GAAGCAGGGGGGCGGAATCTCTCCGGAGGGGAAGCCCCCTGACTGAGTGGCGGACGGGT  
GAGTAACGCGTGGACAACCTACCCCGCACTGGGGGACAACAGCCGAAACGGCTGCTAAT  
ACCGCATATGCGCACGGCCCCGCATGGGGCCGCGCGGAAAGCGCATGCGGTGCGGGATGG  
GTCCGCGTCTGATTAGCTTGTGGCGGGGTAACGGCCCACCAAGGCGACGATCAGTAGCC  
GGCCTGAGAGGGTGGACGGCCACATTGGGACTGAGACACGGCCCAGACTCCTACGGGAGG  
CAGCAGTGGGGGATATTGCACAATGGGGGCAACCCTGATGCAGCGACGCCGCGTGAGCGA  
TGGAGTACTTCCGTATGTAAAGCTCTGTGACGAGGGAAGAGAATGACGGTACCTGACCAA  
GAAGCCCCGGCTAAATACGTGCCAGCA

>Consensus106 len=517 tot-seq=132

AGAGTTTGATCCTGGCTCAGGACGAACGCTGGCGGCGTGCCTAACACATGCAAGTCGAAC  
GGAGTACCCTCGAAAGAGATTTTCGGTCAATGGAGAGGACTACTTAGTGGCGGACGGGTGA  
GTAACGCGTGAGGAACCTGCCTTTCAGAGGGGGACAACAGTTGGAAACGACTGCTAATAC  
CGCATAACGTACGGGTATCGCATGGTACTGGTACCAAAGATTTATCGCTGAGAGATGGCC

TCGCGTCTGATTAGCTAGTTGGTAGGGTAACGGCCTACCAAGGCGACGATCAGTAGCCGG  
ACTGAGAGGTTGGCCGGCCACATTGGGACTGAGATACGGCCCAGACTCCTACGGGAGGCA  
GCAGTGGGGAATATTGGGCAATGGGCGCAAGCCTGACCCAGCAACGCCGCGTGAAGGAAG  
AAGGCTTTCGGGTTGTAAACTTCTTTTGACAGGGAAGAGCAGAAGACGGTACCTGTGAA  
TAAGCCACGGCTAACTACGTGCCAGCAGCCGCGGTAA

>Consensus107 len=530 tot-seq=132

AGAGTTTGATCCTGGCTCAGGATGAACGCTGGCGGCGTGCTTAACACATGCAAGTCAAC  
GGACCTGTACTGAAACCTAGTGATTTACAGGTTAGTGGCGGACGGGTGAGTAACGCGTGG  
AAAACCTGCCGTATACTGGGGGATAACACTTAGAAAATAGGTGCTAATACCGCATAAGGGC  
ACAGACCCGCATGGGACAGTGTGAAAACAAAAAGCTAAAGCTTTTTTATGGTATACGATG  
GTTCCGCGTCTGATTAGCTTGTGGCGGGGTAACGGCCACCAAGGCGACGATCAGTAGC  
CGGCCTGAGAGGGTGAACGGCCACATTGGGACTGAGACACGGCCCAGACTCCTACGGGAG  
GCAGCAGTGGGGAATATTGCACAATGGGGGAAACCCTGATGCAGCGACGCCGCGTGAGTG  
AGAAGTATCTCGGTACGTAAAGCTCTATCAGCAGGGAAGAAAAAGTACTTTGGCTTTG  
GACGGTACCTGACTAAGAAGCCCCGGCTAACTACGTGCCAGCAGCCGCGG

>Consensus108 len=520 tot-seq=131

AGAGTTTGATCATGGCTCAGGATGAACGCTGGCGGCGTGCTTAACACATGCAAGTCAAC  
GGAGATAACATTTTCGAAGCGATTAGTTTACTAAGAGCGGAGATGTTGCTATCTTAGTGG  
CGGACGGGTGAGTAACGCGTGGGTAACCTGCCTTGCACTGGGGGATAACACTTAGAAAATA  
GGTGTAAATACCGCATAACAGGAGAAGACGCATGTCTTTTACTTGAAAACCTCCGGTGGTG  
TAAGATGGACCCGCGTCTGATTAGCTTGTGGCGGGGTAACGGCCACCAAGGCGACGAT  
CAGTAGCCGGCCTGAGAGGGTGAACGGCCACATTGGGACTGAGACACGGCCCAAACCTCCT  
ACGGGAGGCAGCAGTGGGGAATATTGGACAATGGGGGAAACCCTGATCCAGCGACGCCGC  
GTGAGTGAAGAAGTATTTTCGGTATGTAAAGCTCTATCAGCAGGGAAGAAAGAAATGACGG  
TACCTGACTAAGAAGCCCCGGCTAACTACGTGCCAGCAGC

>Consensus109 len=531 tot-seq=129

AGAGTTTGATCATGGCTCAGGATGAACGCTAGCGACAGGCTTAACACATGCAAGTCAAGG  
GGCAGCGGGGGCGGAAGCTTGCTTTTCGCCCGCCGGCGACCGGCGCACGGGTGAGTAACAC  
GTATGCAACCTGGCCGCCACAGGGGATAAACCCGCGGAAACGCGGCCTAATACCCCGTGA  
CGCCACCGGAGGGCATCCTCCGGTGGCCAAAGGAGTGATCCGGTGGCGGATGGGCATGCC  
GCGCATTAGCTAGACGGCGGGGTGACGGCTCACCGTGGCGACGATGCGTAGGGGTTCTGA  
GAGGAAGGCCCCCACACTGGGACTGAGACACGGCCAGACTCCTACGGGAGGCAGCAGT  
GAGGAATATTGGTCAATGGGCGGAAGCCTGAACCAGCCAAGTCGCGTGAGGGACTAAGGC  
CCTGCGGGTTCGTAAACCTCTTTTGCCGGGGAGCAGTGGTCCGGACGTGTCCGGGCCGGGA  
GAGTACCCGGAGAAAAAGCATCGGCTAACTCCGTGCCAGCAGCCGCGGTAA

>Consensus110 len=526 tot-seq=125

AGAGTTTGATCATGGCTCAGGATGAACGCTAGCGGCAGGCTTAACACATGCAAGTCAAGG  
GGCATCGCGGGGAGTGCTTGCACCTCCCTGGCGGCGACTGGCGCACGGGTGAGTAACACGT  
ATGCAACCTGCCCTCCACAGGGGGACAACCTTCCGAAAAGGAGGCTAATCCCGCGTAAAT  
CTCCAGAGGGCATCCTTTGGAGAGGAAAGCTTCTGCGGTGGAGGATGGGCATGCGGCGCA  
TTAGCTTGTGCGCGGGGTAACGGCCCACCGAGGCGACGATGCGTAGGGGTTCTGAGAGGA  
AGGTCCCCCACACTGGTACTGAGACACGGACCAGACTCCTACGGGAGGCAGCAGTGAGGA  
ATATTGGTCAATGGGCGGGAGCCTGAACCAGCCAAGCCGCGTGAGGGAATAAGGCCCTAT  
GGTTCGTAAACCTCTTTTGTGCGGGGAACAAAAGCGGGGACGTGTCCCCGTCTGCGTGTAC  
CCGAAGAAAAAGCATCGGCTAACTCCGTGCCAGCAGCCGCGGTAA

>Consensus111 len=508 tot-seq=123

AGAGTTTGATCCTGGCTCAGGATGAACGCTGGCGGCGTGCTTAACACATGCAAGTCAAC  
GGGGTACCCTTGACAGAGGCTTCGGCCAATGGATAGGAATACCTAGTGGCGGACGGGTGA  
GTAACGCGTGAGGAACCTGCCCTGGAGTGGGGAATAACAGCTAGAAAATAGCTGCTAATAC  
CGCATAATGCAGTTGGGTGCGATGACTCTGACTGCCAAAAGATTTATCGCTCTGAGATGGC  
CTCGCGTCTGATTAGATAGTTGGCGGGGTAACGGCCACCAAGTCGACGATCAGTAGCCG  
GACTGAGAGGTTGGCCGGCCACATTGGGACTGAGACACGGCCCAGACTCCTACGGGAGGC  
AGCAGTGGGGAATATTGGGCAATGGGCGCAAGCCTGACCCAGCAACGCCGCGTGAAGGAA  
GAAGGCCCTCGGGTTGTAAACTTCTTTTATCAGGGACGAAGAAATGACGGTACCTGATGA

ATAAGCCACGGCTAACTACGTGCCAGCA

>Consensus112 len=527 tot-seq=122

AGAGTTTGCATCCTGGCTCAGGATGAACGCTAGCGACAGGCCTAACACATGCAAGTCGAGG  
GGCAGCGGGGAGTAGCAATACTCCTGCCGGCGACCGGCGCACGGGTGAGTAACACGTAT  
GGAACCTGCCCCGCCACAGGGGGATAAGCGGAAGAAATTCGGTCTAATACCGCATAACGTC  
CTGCCGGGGCATCCCGGCGGGACCAAAGGGTAACACCGGTGGCGGATGGCCATGCGCCGC  
ATTAGCTGGTTGGCGGGGTAACGGCCACCAAGGCGACGATGCGTAGGGGTTCTGAGAGG  
AAGTCCCCCACACTGGTACTGAGACACGGACCAGACTCCTACGGGAGGCAGCAGTGAG  
GAATATTGGTCAATGGGCGAGAGCCTGAACCAGCCAAGTCGCGTGAGGGAAGACGGCCCT  
ACGGGTTGTAAACCTCTTTTGTGCGGGGAGCAAAGAGCGGGACGTGTCCCGCGTCGAGAGT  
ACCCGAAGAAAAGCATCGGCTAACTCCGTGCCAGCAGCCGCGGTAA

>Consensus113 len=516 tot-seq=121

AGAGTTTGCATCATGGCTCAGGATGAACGCTGGCGGCGTGCCTAACACATGCAAGTCGAAC  
GGAGTGCCAAAGACAAAACATTTTCGGTGGGCGACTTTGGTAACTGAGTGGCGGACGGGTGA  
GTAACGCGTGGACAACCTGCCGTGTACAGGGGGATAACAGCCGAAACGGCTGCTAATAC  
CGCATATGCGCACAGTGCCGCATGGCACAGGGCGGAAAACGATAGTGGTACACGATGGGT  
CCGCGTCTGATTAGATAGTTGGCGGGGTAACGGCCCCACCAAGTCGACGATCAGTAGCCGG  
CCTGAGAGGGCGGACGGCCACACTGGGACTGAGACACGGCCCAGACTCCTGCGGGAGGCA  
GCAGTGGGGAATATTGCACAATGGGGGAACCCTGATGCAGCGACGCCGCGTGAAGGAAG  
AAGTATTTTCGGTATGTAACTTCTATCAGCAGGGAAGAAAAAGGACGGTACCTGACTAAG  
AAGCCCCGGCTAACTACGTGCCAGCAGCCGCGGTAA

>Consensus114 len=518 tot-seq=120

AGAGTTTGCATCATGGCTCAGGATGAACGCTAGCTACAGGCTTAACACATGCAAGTCGAGG  
GGCAGCATGGTCTTAGCTTGCTAAGACTGATGGCGACCGGCGCACGGGTGAGTAACACGT  
ATCCAACCTGCCTTATACTCCCGGACAGCCTTCTGAAAGGAAGATTAATACGGGATGGTA  
TCACGAGCCAGCATTTTTCTCGTGATTAAGAAGACTTCGGTATAAGATGGGGATGCGTTCCA  
TTAGATAGTAGGCGGGGTAACGGCCCACCTAGTCGACGATGGATAGGGGTTCTGAGAGGA  
AGGTCCCCCACAATTGGAACCTGAGACACGGTCCAAACTCCTACGGGAGGCAGCAGTGAGGA  
ATATTGGTCAATGGGCGGAGCCTGAACCAGCCAAGTAGCCTGAAGGATGACTGCCCTAC  
GGTTGTAAACTTCTTTTATAAAGGAATAAAGTGAGGCACGTGTGCCTTTTTTGTATGTAC  
TTTATGAATAAGGATCGGCTAACTCCGTGCCAGCAGCC

>Consensus115 len=517 tot-seq=120

AGAGTTTGCATCATGGCTCAGGATGAACGCTGGCGGCGTGCTTAACACATGCAAGTCGAAC  
GGACCCATATTGAAACCTAGTGATATATGGGTTAGTGGCGGACGGGTGAGTAACGCGTGG  
GTAACCTGCCTTACACAGGGGGATAACACTTAGAAAATAGGTGCTAAAACCGCATAAGCGC  
ACAGCTTCGCATGAAGCGGTGTGAAAAACTCCGGTGGTGTAAAGATGGACCCGCGTCTGAT  
TAGCTTGTGGCGGGGTAACGGCCCACCAAGGCGACGATCAGTAGCCGGCCTGAGAGGGC  
GGACGGCCACATTGGGACTGAGACACGGCCCAGACTCCTACGGGAGGCAGCAGTGGGGAA  
TATTGCACAATGGGGGAAAACCCTGATGCAGCGACGCCGCGTGAGTGAAGAAGTAATTCGT  
TACGTAAGCTCTATCAGCAGGGAAGAAACTGACCTTACGGTCAGCAGACGGTACCTG  
AGTAAGAAGCCCCGGCTAACTACGTGCCAGCAGCCGC

>Consensus116 len=519 tot-seq=117

AGAGTTTGCATCCTGGCTCAGGATGAACGCTGGCGGCGTGCTTAACACATGCAAGTCGAAC  
GAAGCGCCTTGCCGGAACCCCTTCGGGGAGGAAGGCATTGCGACTGAGTGGCGGACGGGT  
GAGTAACGCGTGGGCAACCTGCCCCATACAGGGGGATAACAGTTAGAAATGACTGCTAAC  
ACCGCATAAGCGCACAGGGCCGCATGGCCCCGTGTGAAAAACTCCGGTGGTATGGGATGG  
GCCCCGCTCTGATTAGCCAGTTGGCGGGGTAACGGCCCACCAAGCGACGATCAGTAGCC  
GACCTGAGAGGGTGACCGGCCACATTGGGACTGAGACACGGCCCAAACCTCCTACGGGAGG  
CAGCAGTGGGGAATATTGCACAATGGGGGAAAACCCTGATGCAGCGACGCCGCGTGAGCGA  
AGAAGTATCTCGGTATGTAAAGCTCTATCAGCAGGGAAGAAAAATGACGGTACCTGACTA  
AGAAGCCCCGGCTAACTACGTGCCAGCAGCCGCGGTAA

>Consensus117 len=520 tot-seq=116

AGAGTTTGCATCCTGGCTCAGGATGAACGCTGGCGGCGTGCTTAACACATGCAAGTCGAAC  
GGACCTGTACTGAAACCTAGTGATTTACAGGTTAGTGGCGGACGGGTGAGTAACGCGTGG

AAAACCTGCCGTATACTGGGGGATAAACACTTAGAAATAGGTGCTAATACCGCATAAGCGC  
ACAGGCCCGCATGGGACAGTGTGAAAACTCCGGTGGTATACGATGGTTCCGCGTCTGAT  
TAGCTTGTGGCGGGTAACGGCCACCAAGGCGACGATCAGTAGCCGGCCTGAGAGGGT  
GAACGGCCACATTGGGACTGAGACACGGCCAGACTCCTACGGGAGGCAGCAGTGGGGAA  
TATTGCACAATGGGGGAAACCCTGATGCAGCGACGCCGCGTGAGTGAAGAAGTATCTCGG  
TACGTAAAGCTCTATCAGCAGGGAAGAAAAAGTACTTTGGCTTTGGACGGTACCTGACT  
AGAAGCCCCGGCTAACTACGTGCCAGCAGCCGCGGTAAT

>Consensus118 len=506 tot-seq=115

AGAGTTTGATCCTGGCTCAGGATGAACGCTGGCGGCGTGCCTAACACATGCAAGTCAAGC  
GGATTTATAACGAAACCTAGTGAATTATAAGTTAGTGGCGGACGGGTGAGTAACGCGTGG  
AAAACCTGCCGTATACTGGGGGATAAACACTTAGAAATAGGTGCTAATACCGCATAAGCGC  
ACAGCTTCGCATGAAGCAGTGTGAAAACTCCGGTGGTATACGATGGTTCCGCGTCTGAT  
TAGCTAGTTGGTGAGGTAAGCCACCAAGGCAACGATCAGTAGCCGGCCTGAGAGGGT  
GAACGGCCACATTGGGACTGAGACACGGCCAGACTCCTACGGGAGGCAGCAGTGGGGGA  
TATTGCACAATGGGGGAAACCCTGATGCAGCGACGCCGCGTGAGTGAAGAAGTATTTTCGG  
TACGTAAAGCTCTATCAGCAGGGAAGAAAAATGACGGTACCTGACTAAGAAGCCCCGGCT  
AACTACGTGCCAGCAGCCGCGGTAAT

>Consensus119 len=501 tot-seq=114

AGAGTTTGATCATGGCTCAGGATAAACGCTGGCGGCGCACATAAGACATGCAAGTCAAGC  
GAACCTAATCCATTCTTTTAGATTGGAAGCGGTTAGTGGCGGACTGGTGAGTAACGCGTG  
AGCAACCTGCCTATTAGAGGGGAATAACAGTGAGAAATCATTGCTAATACCGCATAAGCT  
GATAGAATCGCATGATTTAGTCAGAAAAGGAGAAATCCGCTAATAGATGGGCTCGCGTCT  
GATTAGCTAGTTGGTGAGGTAACGGCTTACCAAGGCAACGATCAGTAGCCGGACTGAGAG  
GTTGAACGGCCACATTGGGACTGAGATACGGCCAGACTCCTACGGGAGGCAGCAGTCCG  
GAATATTGCGCAATGGAGGAACTCTGACGCAGTGACGCCGCGTATGGGAAGAAGGTTTT  
CGGATTGTAAACCATTGTCTGTTAGGGAAGAAGAAGTGACAGTACCTAAGGAGGAAGCTCC  
GGCTAACTATGTGCCAGCAGC

>Consensus120 len=444 tot-seq=113

AGAGTTTGATCATGGCTCAGGACGAACGCTGGCGGCGTGCCTAACACATGCAAGTCAAGC  
GGACCTTTTTTGAAGAAGCCTTCGGGTGGAATTAGGAAAGGTTAGTGGCGGACGGGTG  
AGTAACGCGTAGATAATCTACCTTAAAGACTGGGACAACAGTTGGAACGACTGCTAATA  
CCGGATACGCTGCACATAGGGCATCCTAGGTGCAGGAAAAGAGGCCTCTTAAACAATGCTC  
CTGCTTTTAGATGAGTCTGCGTCTGATTAGCTAGATGGTGGGGTAACGGCTTACCATGGC  
GACGATCAGTAGTCCGCCTGAGAGGGTGACCGGCCACATTGGGACTGAGACACGGCCCAA  
ACTCCTACGGGAGGCAGCAGTGGGGAATCTTCCGCAATGGGCGAAAGCCTGACGGAGCAA  
CGCCGCGTGATCGAATGAAGGCCT

>Consensus121 len=466 tot-seq=109

AGAGTTTGATCATGGCTCAGGATGAACGCTGGCGGCGTGCCTAACACATGCAAGTCAAGC  
GAGAAGCTGATGACAGATACTTCGGTTGAAGGAGTCAAGTGGAAAGCGGCGGACGGGTGAG  
TAACGCGTAGGCAACCTGCCCTTTGCACAGGGATAGCCATTGGAACGATGATTAACAAC  
TGATAACACCATTTGGTTACATGAGCAGATGGTCAAAGATTTATCGGCAAAGGATGGGCC  
TGCGTCTGATTAGCTAGTTGGTAAGGTAACGGCTTACCAAGGCGACGATCAGTAGCCGAC  
CTGAGAGGGTGAACGGCCACATTGGAAGTGAAGACACGGTCCAAACTCCTACGGGAGGCAG  
CAGTGGGGAATATTGCACAATGGGCGAAAGCCTGATGCAGCAACGCCGCGTGAAGGAAGA  
AGGCCTCCCCCGTAACGTTACTCTTTCCCCCTAGGAAGAACGTAGA

>Consensus122 len=511 tot-seq=107

AGAGTTTGATCATGGCTCAGGATGAACGCTGGCGGCGTGCCTAACACATGCAAGTCAAGC  
GGAGCGCCCGGACGGAGTATTTCCGGTACAAAGACCGGGTGGCTGAGTGGCGGACGGGTGA  
GTAACGCGTGGACAACCTGCCGTGTACAGGGGGATAACAGCCGGAACGGCTGCTAATAC  
CGCATATGCGCACAGTGCCGCATGGCACAGGGCGGAAAGCCTAGATCTTATCTAGTACGG  
TACACGATGGGTCCGCGTCTGATTAGGTAGTTGGCGGGGTAACGGCCACCAAGCCCACG  
ATCAGTAGCCGGCCTGAGAGGGCGGACGGCCACACTGGGACTGAGACACGGCCAGACTC  
CTGCGGGAGGCAGCAGTGGGGAATATTGCACAATGGGGGAAACCCTGATGCAGCGACGCC  
CGGTGAAGGAAGAAGTATCTCGGTATGTAACTTCTATCAGCAGGGAAGAAAGAGGACGG

TACCTGACTAAGAAGCCCCGGCTAACTACGT  
>Consensus123 len=510 tot-seq=107  
AGAGTTTGATCCTGGCTCAGGACGAACGCTGGCGGCGTGCCTAACACATGCAAGTCGAAC  
GGAGTGCCTCGGAAAGAGATTTTCGGTCAATGGAAGAGGATACTTAGTGGCGGACGGGTGA  
GTAACGCGTGAGGAACCTGCCTCTCAGAGGGGGACAACAGTTGGAAACGACTGCTAATAC  
CGCATAATATATCTGTATCGCATGGTATGGATATCAAAGATTTATCGCTGAGAGATGGCC  
TCGCGTCTGATTAGCTAGTTGGTAGGGTAACGGCCTACCAAGGCGACGATCAGTAGCCGG  
ACTGAGAGGTTGGCCGGCCACATTGGGACTGAGATACGGCCCAGACTCCTACGGGAGGCA  
GCAGTGGGGAATATTGGGCAATGGGCGCAAGCCTGACCCAGCAACGCCGCGTGAAGGAAG  
AAGGCTTTCGGGTTGTAACCTTCTTTTAAAGAGGGAAGAGCAGAAGACGGTACCTCTTGAA  
TAAGCCACGGCTAACTACGTGCCAGCAGCC  
>Consensus124 len=498 tot-seq=106  
AGAGTTTGATCCTGGCTCAGGATGAACGCTGGCGGCGTGCCTAACACATGCAAGTCGAGC  
GAAGCGCTTAAGTCTGATTCTTCGGATGAAGGCTTTTGTGACTGAGCGGCGGACGGGTGA  
GTAACGCGTGGGCAACCTGCCTTACACAGGGGGATAACAGTTAGAAATGACTGCTAATAC  
CGCATAAGACCACAGAGCTGCATGGCTGAGTGGTAAAACTCCGGTGGTGTAAAGATGGGC  
CCGCGTCTGATTAGGTAGTTGGTGAAGTAACGGCTCACCAAGCCGACGATCAGTAGCCGA  
CCTGAGAGGGTGAACGGCCACATTGGGACTGAGACACGGCCCAGACTCCTACGGGAGGCA  
GCAGTGGGGAATATTGCACAATGGGGGAAACCCTGATGCAGCGACGCCGCGTGAGCGATG  
AAGTATTTTCGGTATGTAAAGCTCTATCAGCAGGGAAGAAAATGACGGTACCTGACTAAGA  
AGCCCCGGCTAACTACGT  
>Consensus125 len=523 tot-seq=106  
AGAGTTTGATCATGGCTCAGGATGAACGCTGGCGGCGTGCCTAACACATGCAAGTCGAAC  
GGGGATGCCATTTTCGAGGTGATTAGTTTACTAAGAGCCAAGATGTTGGCATCTTAGTGG  
CGGACGGGTGAGTAACGCGTGGGTAACCTGCCTTATACAGGGGGATAACACTTAGAAATA  
GGTGCATAATACCGCATAAGCGCACGGGGCTGCATGGCCCAGTGTGAAAACTCCGGTGGT  
ATAAGATGGACCCGCGTCTGATTAGCTTGTGGCGGGGTAACGGCCCACCAAGGCGACGA  
TCAGTAGCCGGCTGAGAGGGTGGACGGCCACATTGGGACTGAGACACGGCCCCAACTCC  
TACGGGAGGCAGCAGTGGGGAATATTGGACAATGGGGGGAACCCTGATCCAGCGACGCCG  
CGTGAGTGAAGAAGTATTTTCGGTATGTAAAGCTCTATCAGCAGGGAAGAAAGAAATGACG  
GTACCTGACTAAGAAGCCCCGGCTAACTACGTGCCAGCAGCCG  
>Consensus126 len=510 tot-seq=105  
AGAGTTTGATCATGGCTCAGGATGAACGCTGGCGGCGTGCCTAACACATGCAAGTCGAGC  
GAAGCACTTTGTTAGAACTTTTCGGAGGGACGAGGAAGTGACTGAGCGGCGGACGGGTGA  
GTAACGCGTGGGCAACCTGCCTTACACAGGGGGATAACAGTTAGAAATGACTGCTAATAC  
CGCATAAGACCACATTGCCGCATGGCAGGGTGGTAAAACTCCGGTGGTGTAAAGATGGGC  
CCGCGTCTGATTAGGTAGTTGGCAGGGTAGAGGCCTACCAAGCCTACGATCAGTAGCCGG  
CCTGAGAGGGTGGACGGCCACATTGGGACTGAGACACGGCCCCAACTCCTACGGGAGGCA  
GCAGTGGGGAATATTGCACAATGGGGGAAACCCTGATGCAGCGACGCCGCGTGAGTGAGG  
AAGTATTTTCGGTATGTAAAGCTCTATCAGCAGGGAAGAAAATGACGGTACCTGACTAAGA  
AGCCCCGGCTAACTACGTGCCAGCAGCCG  
>Consensus127 len=510 tot-seq=104  
AGAGTTTGATCATGGCTCAGGATGAACGCTGGCGGCGTGCCTAACACATGCAAGTCGAAC  
GAGAACCAATGGAATGAGGATTCGTCCAAAGGAAGTTGGGGAAAGTGGCGGACGGGTGAG  
TAACGCGTGAGCAATCTGCCTTGGAGTGGGGAATAACGGCTGGAACAGCCGCTAATACC  
GCATGATACAGCTATCCCGCATGGGGTTGGCTGTCAAAGATTTATCGCTCTGAGATGAGC  
TCGCGTCTGATTAGCTTGTGGCGGGGTAACGGCCCACCAAGGCGACGATCAGTAGCCGG  
ACTGAGAGGTTGGCCGGCCACATTGGGACTGAGACACGGCCCAGACTCCTACGGGAGGCA  
GCAGTGGGGAATATTGGGCAATGGGCGCAAGCCTGACCCAGCAACGCCGCGTGAAGGAAG  
AAGGCTTTCGGGTTGTAACCTTCTTTTCTCAGGGACGAAGAAAGTACGGTACCTGAGGA  
ATAAGCCACGGCTAACTACGTGCCAGCAGC  
>Consensus128 len=471 tot-seq=101  
AGAGTTTGATCATGGCTCAGGATGAACGCTGGCGGCATGCCTAATACATGCAAGTCGAAC  
GAAGTCTTTTGAAAGCTTGCTTTTAAAGACTTAGTGGCGAACGGGTGAGTAACACGTAG

GGAACCTGCCCATGTACCCGGGATAACAGATGGAAACGTCTGCTAAAACCGGATAGGTAT  
AGACAAGGCATCTTGGCTATATTTAAAGGACCTTCGGGTGTGGACATGGATGGACCTGCGG  
CGTATTAGCCAGTTGGCGGGTAACGGCCCACCAAAGCGATGATACGTAGCCGGCCTGAG  
AGGGTAGACGGCCACATTGGGACTGAGACACGGCCCAAACCTCCTACGGGAGGCAGCAGTA  
GGGAATTTTCGTCAATGGGGGAAACCCTGAACGAGCAATGCCGCGTGAGTGAAGAAGGCC  
TTCTTTTCGTAAAGGGGCCCTTGTAAAGAGAAAAACGGTAATAGAAAGGAAA

>Consensus129 len=499 tot-seq=101

AGAGTTTGATCCTGGCTCAGGATGAACGCTGGCGGCGTGCTTAACACATGCAAGTCGAGC  
GAAGCACTTCATCTTAATCTTTCGGATGAGAGATGATTTGACTGAGCGGCGGACGGGTGA  
GTAACGCGTGGGCGACCTGCCTCATAACAGGGGGATAACAGTTAGAAATGACTGCTAATAC  
CGCATAAGACCACAGTACTGCATGGTACAGTGGTAAAAACTCCGGTGGTATGAGATGGGC  
CCGCGTCTGATTAGCTTGTGGCGGGTAACGGCCCACCAAGGCGACGATCAGTAGCCGA  
CCTGAGAGGGTGACCGGCCACATTGGGACTGAGACACGGCCCAAACCTCCTACGGGAGGCA  
GCAGTGGGGAATATTGCACAATGGGGGAAACCCTGATGCAGCGACGCCGCGTGAGCGATG  
AAGTATTTTCGGTATGTAAAGCTCTATCAGCAGGGAAGAAAAATGACGGTACCTGACTAAGA  
AGCCCCGGCTAACTACGTG

>Consensus130 len=503 tot-seq=99

AGAGTTTGATCCTGGCTCAGGATGAACGCTGGCGGCGTGCTTAACACATGCAAGTCGAAC  
GAAGCACTGGAAAGAAAATCCCTTCGGGGAGGACATTCCCTTGACTGAGTGGCGGACGGGT  
GAGTAACGCGTGGGCAACCTGCCCCACACTGGGGGACAACAGCTGGAAACGGCTGCTAAT  
ACCGCATAAGCGCACAGCTTCGCATGAAGCAGTGTGAAAAATTCGGTGGTGTGGGATGG  
GCCCGCTCTGATTAGCTAGTTGGTGAGGTAACGGCTCACCAAGGCGACGATCAGTAGCC  
GGCCTGAGAGGGTGGACGGCCACATTGGGACTGAGACACGGCCAGACTCCTACGGGAGG  
CAGCAGTGGGGAATATTGCACAATGGGGGAAACCCTGATGCAGCGACGCCGCGTGAGCGA  
AGAAGTATTTTCGGTATGTAAAGCTCTATCAGCAGGGAAGAAAAATGACGGTACCTGACTAA  
GAAGCTCCGGCTAAATACGTGCC

>Consensus131 len=497 tot-seq=94

AGAGTTTGATCATGGCTCAGGATGAACGCTGGCGGCGTGCTTAACACATGCAAGTCGAAC  
GAAGCAGGAGGGTGTCTGCACCTTCCTGCTGAGTGGCGGACGGGTGAGTAACACGTGGAT  
AATCTGCCCTGCACAGGGGGACAACAGCTAGAAATGGCTGCTAATACCGCATAAGCCTAC  
AGCCTCGCATGAGGGAGTAGGAAAAGAAATTCGGTGCAGGATGAGTCCGCGTCTGATTAG  
CTAGTTGGAGGGGTAAGAGCCCACCAAGGCAACGATCAGTAGCCGGCCTGAGAGGGCGAC  
CGGCCACATTGGGACTGAGACACGGCCCAAACCTCCTACGGGAGGCAGCAGTGGGGAATAT  
TGCACAATGGGGGGAACCCTGATGCAGCGACGCCGCGTGAGCGAGGAAGTATTTTCGGTAT  
GTAAAGCTCTATCAGCAGGGACGAAAAAAGACGGTACCTGACTAAGAAGCCCCGGCTAAC  
TACGTGCCAGCAGCCGC

>Consensus132 len=515 tot-seq=93

AGAGTTTGATCATGGCTCAGGATGAACGCTGGCGGCGTGCCCTAACACATGCAAGTCGAGC  
GAAGCGATTTTGAGGAAGTTTTTCGGATGGAATCGAAATGACTTAGCGGCGGACGGGTGA  
GTAACACGTGGGTAATCTGCCCTTATACAGGGGGATAACAGTTAGAAATGACTGCTAATAC  
CGCATAAGCGCACGGGGACGCATGTTTCTGTGTGAAAAACTCCGGTAGTATAAGATGAGC  
CCGCGTCTGATTAGCTGGTTGGTGGGGTAACGGCCTACCAAGGCGACGATCAGTAGCCGG  
CCTGAGAGGGTGAACGGCCACATTGGGACTGAGACACGGCCCAAACCTCCTACGGGAGGCA  
GCAGTGGGGAATATTGCACAATGGGGGAAACCCTGATGCAGCGACGCCGCGTGAGTGAAG  
AAGTATTTTCGGTATGTAAAGCTCTATCAGCAGGGAAGAAAAAAGACGGTACCTGACTAAG  
AAGCCCCGGCTAACTACGTGCCAGCAGCCGCGGTA

>Consensus133 len=515 tot-seq=93

AGAGTTTGATCATGGCTCAGGATGAACGCTGGCGGCGTGCTTAACACATGCAAGTCGAAC  
GAAGCGCTTAAGGACAATCTTTCGGAGGCGTACTTTTTCGACTGAGTGGCGGACGGGTGA  
GTAACGCGTGGGTAACCTGCCCTATACAGGGGGATAACAGTTAGAAATGACTGCTAATAC  
CGCATAAGCGCACAGAACCGCATGGTTCGGTGTGAAAAACTGAGGTGGTATAGGATGGAC  
CCGCGTCTGATTAGCTTGTGGTGGGGTAACGGCTCACCAAGGCGACGATCAGTAGCCGG  
CCTGAGAGGGCGACCGGCCACATTGGGACTGAGACACGGCCCAAACCTCCTACGGGAGGCA  
GCAGTGGGGAATATTGCACAATGGGGGAAACCCTGATGCAGCGACGCCGCGTGAGTGAAG



AAGTATTTTCGGTATGTAAAGCTCTATCAGCAGGGAAGAAAATGACGGTACCTGACTAAGA  
AGCCCCGGCTAACTACGTGCCAGCAGCCGCGGTAA

>Consensus134 len=507 tot-seq=92

AGAGTTTGGATCATGGCTCAGGACGAACGCTGGCGGCGTGCCTAATACATGCAAGTCTGAAC  
GGAGATATTCGCTGATGAAGTACTTCGGTAATGATTCTTGGATATCTTAGTGGCGGACGG  
GTGAGTAACGCGTGAGCAACCTGCCTTTCAGAGGGGGATAACGTTTGGAAACGAACGCTA  
ATACCGCATGACATTATTGAGCTGCATGGCTTGATAATCAAAGGAGCAATCCGCTGAAAAG  
ATGGGCTCGCGTCCGATTAGGTAGTTGGTGGGGTAACGGCCCACCAAGCCGACGATCGGT  
AGCCGGACTGAGAGGTTGGACGGCCACATTGGGACTGAGACACGGCCCAGACTCCTACGG  
GAGGCAGCAGTAAGGGATATTGGTCAATGGGGGAAAACCTGAACCAGCAACGCCGCGTGA  
GGGAAGACGGTTTTTCGGATTGTAAACCTCTGTCTCTGTGAAGATGATGACGGTAGCAGA  
GGAGGAAGCTCCGGCTAACTACGTGCC

>Consensus135 len=510 tot-seq=89

AGAGTTTGGATCATGGCTCAGGATGAACGCTAGCGGCAGGCTTAACACATGCAAGTCTGAGG  
GGCAGCATGGGAGTAGCAATACTTCTGATGGCGACCGGCGCACGGGTGCGTAACGCGTAT  
GCAACCTACCTGTAACAGGGGGATAACACTGAGAAAATCGTACTAATACCGCATAACACT  
ATGAGAGGCATCTCTTGTGGTTGAAAGTTTTCGGCGGTTACAGATGGGCATGCGTTGTATT  
AGCTGGTTGGTAAGGTAACGGCTTACCAAGGCGACGATACATAGGGGGACTGAGAGGTTA  
ACCCCCACATTGGTACTGAGACACGGACCAAACCTCCTACGGGAGGCAGCAGTGAGGAAT  
ATTGGTCAATGGACGGAAGTCTGAACCAGCCATGCCGCGTGCAGGAAGACGGCTCTATGA  
GTTGTAAACTGCTTTTGTACAAGGGTAAACCTGAATACGTGTATTCAGCTGAAAGTACTG  
TACGAATAAGGATCGGCTAACTCCGTGCCA

>Consensus136 len=508 tot-seq=88

AGAGTTTGGATCATGGCTCAGGATGAACGCTGGCGGCGTGCCTTAACACATGCAAGTCTGAAC  
GGAGTACCCTTGAAGGAGTTTTTCGGACAACCTGATAGGACTACTTAGTGGCGGACGGGTGA  
GTAACGCGTGAGTAACCTGCCCTGGAGTGGGGAATAACAGCTGGAAACAGCTGCTAATAC  
CGCATGATGCAGTTGGGTGCGATGGCTCTGACTGCCAAAGATTTATCGCTCTGAGATGGA  
CTCGCGTCTGATTAGCTAGTTGGCGGGGTAACGGCCCACCAAGGCGACGATCAGTAGCCG  
GACTGAGAGGTTGGCCGGCCACATTGGGACTGAGACACGGCCCAGACTCCTACGGGAGGC  
AGCAGTGGGGAATATTGGGCAATGGGCGCAAGCCTGACCCAGCAACGCCGCGTGAAGGAA  
GAAGGCTTTTCGGGTTGTAAACTTCTTTTTTTCAGGGACGAAGAAAGTGACGGTACCTGAGG  
AATAAGCCACGGCTAACTACGTGCCAGC

>Consensus137 len=517 tot-seq=88

AGAGTTTGGATCATGGCTCAGGATGAACGCTGGCGGCGTGCCTTAACACATGCAAGTCTGAGC  
GAAGCGCTCACGCGGAATTTTTTCGGAAGGAAGCGGGAGTGACTTAGCGGCGGACGGGTGA  
GTAACGCGTGGGTAACCTGCCCCATACCGGGGGATAACGGTTAGAAATGACCGCTAATAC  
CGCTTAAGCGCGCGAGGCCGCGATGGCCGCGCGGAAAAACTCCGGTGGTATGGGATGGGC  
CCGCGTCTGATTAGGTAGTTGGCGGGGTAAGGGCCCACCAAGCCGACGATCAGTAGCCGA  
CCTGAGAGGGTGGCCGGCCACATTGGGACTGAGACACGGCCCAAACCTCCTACGGGAGGCA  
GCAGTGGGGAATATTGCGCAATGGGGGAAAACCTGACGCAGCAACGCCGCGTGAGTGAGG  
AAGTATCTCGGTATGTAAAGCTCTATCAGCGGGGAAGAAGGAAGACGGTACCCGACTAAG  
AAGCCCCGGCTAACTACGTGCCAGCAGCCGCGGTAAT

>Consensus138 len=521 tot-seq=87

AGAGTTTGGATCATGGCTCAGGATGAACGCTGGCGGCGTGCCTAACACATGCAAGTCTGAAC  
GGAGACGGAGCTGGAAGGGACAGTTTACTGTAACGGAAAAGATCTGTCTTAGTGGCGGACG  
GGTGAAGTAACGCGTGGGCAACCTGCCCTGTACCGGGGGATAACACTTAGAAATAGGTGCT  
AATACCGCATAATAGGGAATACCGCATGGTAATCCTTTGAAAACCTCCGGTGGTACAGGAT  
GGGCCCCGCTCTGATTAGCCAGTTGGCGGGGTAACGGCCCACCAAGCGACGATCAGCAG  
CCGGCCTGAGAGGGTGGACGGCCACACTGGGACTGAGACACGGCCCAGACTCCTACGGGA  
GGCAGCAGTGGGGAATATTGCACAATGGGGGAAAACCTGATGCAGCGACGCCGCGTGAGT  
GAAGAAGTATTTTCGGTATGTAAAGCTCTGTCTCAGCAGGGAAGAAGAAGACGGTACCTGAC  
CAAGAAGCCCCGGCTAACTACGTGCCAGCAGCCGCGGTAAT

>Consensus139 len=520 tot-seq=86

AGAGTTTGGATCATGGCTCAGGATGAACGCTAGCGGCAGGCCTAACACATGCAAGTCTGAGG

GGCAGCGGGTAAGTAGCTTGCTACTTATGCCGGCGACCGGCGGACGGGTGCGTAACGCGT  
ATGGAACCTACCTTTTACTGGGGGATAACATCGAGAAATGGTACTAATACCCCATAA  
TCATCGGAGGCATCTCCGGTGGTTGAAAACCTCCGGTGGTAAGAGATGGACATGCGTTGTA  
TTAGTTAGTTGGTGAGGTAACGGCTCACCAAGACAGCGATACATAGGGGGACTGAGAGGT  
CAACCCCCCATTGGTACTGAGACACGGACCAAACCTCTACGGGAGGCAGCAGTGAGGA  
ATATTGGTCAATGGACGCAAGTCTGAACCAGCCATGCCGCGTGCAGGAAGACGGCTCTAT  
GAGTTGTAAACTGCTTTTGTACGAGGGTAAATCCCGATACGTGTATCGGGTTGAAAGTAT  
CGTACGAATAAGGATCGGCTAACTCCGTGCCAGCAGCCGC

>Consensus140 len=481 tot-seq=85

AGAGTTTGATCCTGGCTCAGAACGAACGCTGGCGGCAGGTCTTAGGCATGCAAGTCGAAC  
GGGTGAAGCAGAGCTTGCTCTGTGGATCTAGTGGCGCACGAGTGAGTAACGCGTGGGAAA  
CTGCCACCCTGGGGAATAACGTTTGGAAACGAACGCTAATACCGCATAACCCGGAAC  
GGGAAAGATTTATCGGTGGTGGATGTGCCCGCGTTGGATTAGCTTGTGGTGGGGTAACG  
GCCTACCAAGGCGATGATCCATAGCTGGTCTGAGAGGACGATCAGCCACGCTGGAAGTGA  
GACACGGTCCAGACTCCTACGGGAGGCAGCAGCTAAGAATATTGGGCAATGGAGGAAACT  
CTGACCCAGCCATGCCGCGTGAATGAAGAAGGCCCTTCGTTGTAAGTTCTTTTAGTCGTG  
AAGATGATGACAGTAGCGACAGAAAAGACACCGGCTAACTTCGTGCCAGCAGCCGCGGTA  
A

>Consensus141 len=515 tot-seq=84

AGAGTTTGATCATGGCTCAGGATGAACGCTAGCTACAGGCTTAACACATGCAAGTCGAGG  
GGCAGCATGGACTTAGCTTGCTAAGTCCGATGGCGACCGGCGCACGGGTGAGTAACACGT  
ATCCAACCTGCCTTCAACTCAGGGATAGCCTTTCGAAAGAAAGATTAATACTTGATGGCA  
TAACCTGGTCTCCTGACTTGGTTATTAAGAATTTTCGGTTGAAGATGGGGATGCGTTCCA  
TTAGGCAGTTGGCGGGGTAACGGCCACCAAACCTACGATGGATAGGGGTTCTGAGAGGA  
AGGTCCCCCACATTGGAAGTGAACACGGTCCAAACTCCTACGGGAGGCAGCAGTGAGGA  
ATATTGGTCAATGGACGAGAGTCTGAACCAGCCAAGTAGCCTGAAGGATGACTGCCCTAT  
GGTTGTAAACTTCTTTTATATGGGAATAAAGTTCAGTATGTATACTGTTTTGTATGTAC  
CATATGAATAAGGATCGGCTAACTCCGTGCCAGCA

>Consensus142 len=505 tot-seq=84

AGAGTTTGATCATGGCTCAGGATGAACGCTGGCGGCGTGCCTAACACATGCAAGTCGAAC  
GGATCCATATTGAAACCTAGTGATGTATGGATTAGTGGCGGACGGGTGAGTAACGCGTGG  
ATAACCTGCCGTATACAGGGGGATAACACTTAGAAATAGGTGCTAATACCGCATAAGCGC  
ACGGTTCCGCATGGAACAGTGTGAAAAACTCCGGTGGTATACGATGGATCCGCGTCTGAT  
TAGCCAGTTGGCGGGGTAACGGCCACCAAAGCGACGATCAGTAGCCGGCCTGAGAGGGT  
GAACGGCCACATTGGGACTGAGACACGGCCAAACTCCTACGGGAGGCAGCAGTGGGGAA  
TATTGCACAATGGGGGAAACCCTGATGCAGCGACCCGCGTGAGTGAAGAAGTATCTCGG  
TACGTAAGCTCTATCAGCAGGGAAGAAAATGACGGTACCTGACTAAGAAGCCCCGGCTA  
ACTACGTGCCAGCAGCCGCGGTAAT

>Consensus143 len=501 tot-seq=83

AGAGTTTGATCCTGGCTCAGGATGAACGCTGGCGGCGTGCCTAACACATGCAAGTCGAAC  
GGTTAAACCGCCCTCGGGCGGACATACAGTGGCGAACGGGTGAGTAACACGTGACCAACC  
TGCCCCGCGCTCCGGGACAACCGCTGGAAACGGCGGCTAATACCGGATACTCCGCGGCC  
CCGCATGGGGGCGGCGGGAAAGCCCCGACGGCGCGGGATGGGGTTCGCGGCCCATTAGGTA  
GTAGGCGGGGTAGAGGCCACCTAGCCGACGATGGGTAGCCGGACTGAGAGGTGATCGG  
CCACATTGGGACTGAGATACGGCCAGACTCCTACGGGAGGCAGCAGTGGGGAAATTTGC  
GCAATGGGGGAAACCCTGACGCAGCAACGCCGCGTGCGGGACGAAGGCCCTCGGGTTCGTA  
AACCGCTTTCAGCAGGGAAGACCTTACGACGGTACCTGCAGAAGAAGCTCCGGCTAACTA  
CGTGCCAGCAGCCGCGGTAAT

>Consensus144 len=508 tot-seq=83

AGAGTTTGATCATGGCTCAGGATGAACGCTGGCGGCGTGCCTAACACATGCAAGTCGAAC  
GGAGTACCCCTGAAGGAGTTTTCGGACAACCTGATGGGACTACTTAGTGGCGGACGGGTGA  
GTAACGCGTGAGTAACCTGCCCTGGAGTGGGGAATAACAGCTGGAAACAGCTGCTAATAC  
CGCATAATATATCTGTGTCGATGGCACTGGATATCAAAGATTTATCGCTCTGAGATGGA  
CTCGCGTCTGATTAGCTGGTTGGCGGGGTAACGGCCACCAAGGCGACGATCAGTAGCCG

GACTGAGAGGTTGGCCGGCCACATTGGGACTGAGACACGGCCCAGACTCCTACGGGAGGC  
AGCAGTGGGGAATATTGGGCAATGGGCGCAAGCCTGACCCAGCAACGCCGCGTGAAGGAA  
GAAGGCTTTTCGGGTTGTAAACTTCTTTTCTCAGGGACGAAGCAAGTGACGGTACCTGAGG  
AATAAGCCACGGCTAACTACGTGCCAGC

>Consensus145 len=503 tot-seq=82

AGAGTTTGATCATGGCTCAGGATGAACGCTGGCGGCGTGCTTAACACATGCAAGTCGAAC  
GAAGCACAGAGAGCAGATTACTTCGGTTTTGAAGCTTTTTGTGACTGAGTGGCGGACGGGT  
GAGTAACGCGTGGATAACCTGCCTCACACAGGGGGATAACAGTTAGAAATGACTGCTAAT  
ACCGCATAAGCGCACAGTCTCGCATGGGACAGTGTGAAAACTGAGGTGGTGTGAGATGG  
ATCCGCGTCTGATTAGGCAGTTGGCGGGGTAACGGCCCACAAACCGACGATCAGTAGCC  
GGCCTGAGAGGGTGAACGGCCACATTGGGACTGAGACACGGCCAAACTCCTACGGGAGG  
CAGCAGTGGGGAATATTGCACAATGGGGGAAACCCTGATGCAGCGACGCCGCGTGAAGGA  
AGAAGTATTCGGTATGTAAACTTCTATCAGCAGGGAAAGAAAATGACGGTACCTGACTAAG  
AAGCCCGGGCTAACTACGTGCCA

>Consensus146 len=505 tot-seq=82

AGAGTTTGATCATGGCTCAGGATGAACGCTGGCGGCGTGCTTAACACATGCAAGTCGAAC  
GGACTTAACAGGAAACCTAGTGAATGTTAAGTTAGTGGCGGACGGGTGAGTAACGCGTGG  
GTAACCTGCCGTATACCGGGGGATAACACCTGGAAACAGGTGCTAATACCGCATAAGCGC  
ACGGGACCGCATGGTCCAGTGTGAAAAACCGAGGTGGTATGCGATGGACCCGCGTCTGAT  
TAGCCAGTTGGCAGGGTAACGGCCTACCAAAGCGACGATCAGTAGCCGGCCTGAGAGGGT  
GGACGGCCACATTGGGACTGAGACACGGCCAAACTCCTACGGGAGGCAGCAGTGGGGAA  
TATTGCACAATGGGGGAAACCCTGATGCAGCGACGCCGCGTGAAGTGAAGAAGTCATTTCGT  
GATGTAAAGCTCTATCAGCAGGGAAAGAAAATGACGGTACCTGACCAAGAAGCCCCGGCTA  
ACTACGTGCCAGCAGCCGCGTAAT

>Consensus147 len=517 tot-seq=81

AGAGTTTGATCATGGCTCAGGATGAACGCTGGCGGCGTGCTTAACACATGCAAGTCGAAC  
GGAECTACTCCGATGAGAGTCTTCGAAAGGATTTGGTTTAGTTTTAGTGGCGGACGGGTG  
AGTAACGCGTGGGTAACCTGCCCTATACAGGGGGATAACAGTTGAAACGACTGTTAATA  
CCGCATAAGCGCACAGGAGCGCATGCTCCGGTGTGAAAACTCCGGTGGTATAGGATGGA  
CCCGCGTCTGATTAGCTGGTTGGCGGGGTAACGGCCCACCAAGGCGACGATCAGTAGCCG  
GCCTGAGAGGGTGAACGGCCACATTGGGACTGAGACACGGCCAAACTCCTACGGGAGGC  
AGCAGTGGGGAATATTGCACAATGGGGGAAACCCTGATGCAGCGACGCCGCGTGAAGGAA  
GAAGTATCTCGGTATGTAAAGCTCTATCAGCAGGGAAAGAAAATGACGGTACCTGACTAAG  
AAGCCCCGGCTAACTACGTGCCAGCAGCCGCGTAAT

>Consensus148 len=511 tot-seq=80

AGAGTTTGATCCTGGCTCAGGATGAACGCTGGCGGCGTGCTTAACACATGCAAGTCGAGC  
GAAGCACTCGGCCTTGAAATCTTCGGAGGAAAGGCGGTTTGACTGAGCGGCGGACGGGTGA  
GTAACGCGTGGGCAACCTGCCCATACGGGGGGATAACAGTTAGAAATGACTGCTAATAC  
CGCATAAGACCGCGGTGCCGCATGGCACAGCGGTAAAACTCCGGTGGTATGGGATGGGC  
CCGCGTCTGATTAGCTAGTTGGCGGGGTAACGGCCCACCAAGGCGACGATCAGTAGCCGA  
CCTGAGAGGGCGACCGGCCACATTGGGACTGAGACACGGCCAAACTCCTACGGGAGGCA  
GCAGTGGGGAATATTGCACAATGGGGGAAACCCTGATGCAGCGACGCCGCGTGAAGGATG  
AAGTATTTTCGGTATGTAAAGCTCTATCAGCAGGGAAAGAAATGACGGTACCTGACTAAGA  
AGCCCCGGCTAACTACGTGCCAGCAGCCGCG

>Consensus149 len=504 tot-seq=77

AGAGTTTGATCCTGGCTCAGGATGAACGCTGGCGGCGTGCTTAACACATGCAAGTCGAAC  
GAGAACCATTGGATCGAGGATTCGTCCAAGTGAAGGTGGGGAAAGTGGCGGACGGGTGAG  
TAACGCGTGAAGCAATCTGCCTGGAGTGGGGAATAACGGCTGAAACAGCCGCTAATACC  
GCATGATACAGCTGGGAGGCATCTCCCTGGCTGTCAAAGATTTATCGCTCTGAGATGAGC  
TCGCGTCTGATTAGCTAGTTGGCGGGGTAACGGCCCACCAAGGCGACGATCAGTAGCCGG  
ACTGAGAGGTTGGCCGGCCACATTGGGACTGAGACACGGCCAGACTCCTACGGGAGGCA  
GCAGTGGGGAATATTGGGCAATGGGCGCAAGCCTGACCCAGCAACGCCGCGTGAAGGAA  
AAGGCTTTTCGGGTTGTAAACTTCTTTTGTGAGGGACGAAGCAAGTGACGGTACCTGACGA  
ATAAGCCACGGCTAACTACGTGCC

>Consensus150 len=502 tot-seq=76

AGAGTTTGCATCCTGGCTCAGGATGAACGCTGGCGGCGTGCCTAACACATGCAAGTCGAAC  
GGAGATATTGCTTGGAAAGCTTTTCGAGGTGAAAGAGAAGTATCTTAGTGGCGGACGGGTG  
AGTAACGCGTGGGCAACCTGCCTCATAACAGGGGATAGCATCGGGAAACTGGTGGTAAAA  
CCGCATAAGCGCACGAAGACGCATGTATTTGTGTGAAAAGGAGAAATCTGGTATGAGATG  
GACCCGCGTCTGATTAGCTAGTTGGAGTGGTAAAAGCACACCAAGGCGACGATCAGTAGC  
CGGCCTGAGAGGGTGACGGCCACATTGGGACTGAGACACGGCCAGACTCCTACGGGAGG  
CAGCAGTGGGGAATATTGCACAATGGAGGAACTCTGATGCAGCGACGCCGCGTGAGTGA  
AGAAGTAATTCGTTATGTAAAGCTCTATCAGCAGGGAAGAAAGTGACGGTACCTGAAAAA  
GAAGCTCCGGGTGGATACGTTT

>Consensus151 len=519 tot-seq=74

AGAGTTTGCATCCTGGCTCAGGATGAACGCTGGCGGCGTGCCTAACACATGCAAGTCGAAC  
GGAGTTATCATTTTTTGAAGCGATTAGCTTGCTAAGAGTGAAATGTTGGTAACTTAGTGG  
CGGACGGGTGAGTAACGCGTGGAGAACCTGCCTTACACAGGGGGATAACACTTAGAAATA  
GGTGCTAATACCGCATAAGCGCACAGGACCGCATGGTCCGGTGTGAAAAACTGAGGTGGT  
GTAAGATGGCTCCGCGTCTGATTAGCTTGTGGTAGGGTAACGGCCTACCAAGGCGACGA  
TCAGTAGCCGGCCTGAGAGGGTGAACGGCCACATTGGGACTGAGACACGGCCCAAACCTCC  
TACGGGAGGCAGCAGTGGGGAATATTGGACAATGGGGGAAACCCCTGATCCAGCGACGCCG  
CGTGAGTGAAGAAGTATTTCCGGTATGTAAAGCTCTATCAGCAGGGAAGAAATGACGGTA  
CCTGACTAAGAAGCCCCGGCTAACTACGTGCCAGCAGCC

>Consensus152 len=507 tot-seq=74

AGAGTTTGCATCCTGGCTCAGGATGAACGCTAGCGGCAGGCTTAACACATGCAAGTCGCGG  
GGCAGCGGGGGATGTAGCAATACATTCTGCCGGCGACCGGCGCAAGGGTGCCTAACCGCT  
GAGCAACATGCCCCTCTCAGGGGGATAACCGGTGGAAACGCCGCTAATACCCCATGGTG  
ACATCCGGAGGCATCTCCGGTGTCTAAAGCTCCGGCGGAGACGGATTGGCTCGCGTGAC  
ATTAGCTGGACGGCGGGGTAACGGCCACCGTGGCGACGATGTCTAGGGGTTCTGAGAGG  
AAGGTCCCCACACTGGAACCTGAGACACGGTCCAGACTCCTACGGGAGGCAGCAGTGAGG  
AATATTGGTCAATGGGCGGGAGCCTGAACCAGCCATGCCGCGTGAAGGCGAGTGCCCTAC  
GGGCGTTAAACTTCTTTTGTGCGGGAGCAATAAGGCCACGTGTGGCCCGATGAGAGTACC  
GCACGAATAAGCATCGGCTAACTCCGT

>Consensus153 len=500 tot-seq=74

AGAGTTTGCATCCTGGCTCAGGATGAACGCTGGCGGCGTGCCTAACACATGCAAGTCGAAC  
GAATAACCCGCCTTCCGGCGGTGCATAGAGTGGCGAACGGGTGAGTAACACGTGACCAACC  
TGCCCCGCACCCCGGGACAACCGCCGAAACGGCGGCTAATACCGGATACTCCGGGCCTC  
GCGCATGCGCGGCCCGGGAAAGCCAGACGGTGCGGGATGGGGTTCGCGGCCCATTAGGTA  
GTAGGCGGGGCAACGGCCCACCTAGCCTGCGATGGGTAGCCGGCCTGAGAGGGCGATCGG  
CCACATTGGGACTGAGATACGGCCAGACTCCTACGGGAGGCAGCAGTGGGGAATATTGC  
GCAATGGGGGCAACCCCTGACGCAGCAACGCCGCGTGCGGGACGAAGGCCTTCGGGTTGTA  
AACCGCTTTTCAGCAGGGAAGAACCATGACGGTACCTGCAGAAGAAGCCCCGGCTAACTAC  
GTGCCAGCAGCCGCGGTAAA

>Consensus154 len=510 tot-seq=74

AGAGTTTGCATCCTGGCTCAGGATGAACGCTGGCGGCGTGCCTAACACATGCAAGTCGAAC  
GGGGATGCTGACGGAAGGGGTGCTTGCACTCTGGAAGTAAGGATCTTAGTGGCGGACGGG  
TGAGTAACGCGTGGGTAACTGCCCCATACCGGGGATAACACCTGGAACAGGTGCTAA  
TACCGCATAAGCGCACGGGAGCGCATGCTCCTGTGTGAAAACTCCGGTGGTATGGGATG  
GACCCGCGTCTGATTAGCCAGTTGGCAGGGTAACGGCCTACCAAAGCGACGATCAGTAGC  
CGGCCTGAGAGGGTGGACGGCCACATTGGGACTGAGACACGGCCCAAACCTCCTACGGGAG  
GCAGCAGTGGGGAATATTGCACAATGGGGGAAACCCCTGATGCAGCGACGCCGCGTGAGTG  
AGAAGTATTTCCGGTATGTAAAGCTCTATCAGCAGGAACGAGACAAGACGGTACCTGACT  
AGAAGCCCCGGCTAACTACGTGCCAGCAG

>Consensus155 len=516 tot-seq=74

AGAGTTTGCATCCTGGCTCAGGATGAACGCTGGCGGCGTGCCTAACACATGCAAGTCGAAC  
GGGGTATATAAGCGGAAGTTTACGGATGGAAGGTTATATACTTAGTGGCGGACGGGTGAG  
TAACGCGTGGGCAACCTGCCCGTGCCGGGGGATAACCGCTGGAACAGGCGCTAATACC

GCATAAGCGCATAACAGCCGCATGGGTGTATGCGGAAAGCTCCGGCGGCACGGGATGGGCC  
CGCGCCCCGATTAGCCAGTTGGCGGGGTAACGGCCACCAAAGCGACGATCGGTAGCCGGC  
CTGAGAGGGCGGACGGCCACATTGGGACTGAGACACGGCCAAACTCCTACGGGAGGCAG  
CAGTGGGGAATATTGCACAATGGGGGAAACCCTGATGCAGCAACGCCGCGTGGGTGAAGG  
AGCGTTTCGGCGCGTAAAGCCCTGTCAGCGGGGAAGAAGAAAGACGGTACCCGACCAAGA  
AGCCCCGGCTAACTACGTGCCAGCAGCCGCGGTAAT

>Consensus156 len=503 tot-seq=71

AGAGTTTGATCCTGGCTCAGGATGAACGCTGGCGGCGTGCCTAACACATGCAAGTCGAGC  
GAAGCATTAAACATGAAGTTTTCGGACGGAATGTTATCTGACTGAGCGGCGGACGGGTGA  
GTAACGCGTGGGTAACCTGCCTTATACAGGGGGATAACAGTTAGAAATGACTGCTAATAC  
CGCATAAGCGCACAGTACCGCATGGTACAGTGTGAAAACTCCGGTGGTATAAGATGGAC  
CCGCGTCTGATTAGCCAGTTGGCGGGGTAACGGCCACCAAAGCGACGATCAGTAGCCGA  
CCTGAGAGGGTGACCGGCCACATTGGGACTGAGACACGGCCAAACTCCTACGGGAGGCA  
GCAGTGGGGAATATTGCACAATGGGGGAAACCCTGATGCAGCAACGCCGCGTGAAGTGAAG  
AAGTATTTTCGGTATGTAAAGCTCTATCAGCAGGGAAGAAGATGACGGTACCTGATTAAGA  
AGCCCCGGCTAACTACGTGCCAG

>Consensus157 len=522 tot-seq=70

AGAGTTTGATCCTGGCTCAGGATGAACGCTAGCGGCAGGCTTAACACATGCAAGTCGAGG  
GGCATCGGCAGAGGTGCTTGCACCTTCTGGCCGGCGACCGGCGCACGGGTGAGTAACACGT  
ATGCAACCTGCCCCTGTCAGGGGGACAACCTTCCGAAAGGGAGGCTAAACCCGCGTAAAT  
GTTCTTGGGGCATCCCGGGGAGAGGAAAGGCTTCGGCCGGACAGGGATGGGCATGCGGCG  
CATTAGGCAGACGGGGGTGTAACGGACCACCGTACCGACGATGCGTAGGGGTTCTGAGAG  
GAAGGTCCCCCACACTGGTACTGAGACACGGACCAGACTCCTACGGGAGGCAGCAGTGA  
GGAATATTGGTCAATGGGCGGGAGCCTGAACCAGCCAAGCCGCGTATGGAGGAAGGCGC  
TAAGCGTCGTAAACATCTTTTGCCTGGGGAACAAAGGCAGCCACGTGTGGCTGAATGAGTG  
TACCCGGAGAAAAAGCATCGGCTAACTCCGTGCCAGCAGCCG

>Consensus158 len=424 tot-seq=69

AGAGTTTGATCCTGGCTCAGGACGAACGCTGGCGGCACGCCTAACACATGCAAGTCGAAC  
GGAGTGAAGATGCTCGCATCTGAACTTAGTGGCGGACGGGTGAGTAACACGTGAGCAACC  
TGCCTTTCAGAGGGGGATAACGTTTGGAAACGAACGCTAATACCGCATAAAATATCGGAG  
TCGCATGGCACTGATATCAAAGGAGCAATCCGCTGAAAAGATGGGCTCGCGTCCGATTAGG  
CAGTTGGCGGGGTAACGGCCACCAAACCGACAATCCGGTAGCCGGACTGAGAGGTTGAAC  
GGCCACATTGGGACTGAGACACGGCCAGACTCCTACGGGAGGCAGCAGTGGGGGATATT  
GCACAATGGGGGAAACCCTGATGCAGCGATGCCGCGTGAATGAAGACGGCCTCGGTTGTA  
AGTT

>Consensus159 len=498 tot-seq=68

AGAGTTTGATCATGGCTCAGGATAAACGCTGGCGGCGCACATAAGACATGCAAGTCGAAC  
GGACTTAACTCATTCTTTTAGATTGAGAGCGGTTAGTGGCGGACTGGTGAGTAACACGTA  
AGCAACCTGCCTATCAGAGGGGAATAACAGTGAGAAATCATTGCTAATACCGCATATGCT  
CACAGTATCACATGATACAGTGAGGAAAGGAGTAATCCGCTGATAGATGGGCTTGCCTCT  
GATTAGTTAGTTGGTGGGGTAACGGCCTACCAAGACTACGATCAGTAGCCGGACTGAGAG  
GTTGAACGGCCACATTGGGACTGAGATACGGCCAGACTCCTACGGGAGGCAGCAGTCCG  
GAATATTGCGCAATGGAGGAAACTCTGACGCAGTGACGCCGCGTATAGGAAGAAGGTTTT  
CGGATTGTAAACTATTGTCAATTAGGGAAGATAAAAAGACTGTACCTAAGGAGGAAGCCCC  
GCTAACTATGTGCCAGCA

>Consensus160 len=524 tot-seq=66

AGAGTTTGATCATGGCTCAGGATGAACGCTAGCGACAGGCTTAACACATGCAAGTCGAGG  
GGCAGCGGGGGCACTGGTTCGCCAGTGCCTGCCGGCGACCGGCGCACGGGTGAGTAACAC  
GTATGCAACCTGGCCTCTGCAGGGGGATAACCGGTGGAAACACCGCCTAATACCCCGCGA  
CGCCACCCCGGGGCATCCCGGGGCGGCCAAAGGAGCGATCCGGCGGAGGATGGGCATGCG  
GCGCATTAGCTGGTGGCGGGGTGACGGCCACCGAGGCGACGATGCGTAGGGGTTCTGA  
GAGGAAGGCCCCCACACTGGGACTGAGACACGGCCAGACTCCTACGGGAGGCAGCAGT  
GAGGAATATTGGTCAATGGGCGGAAGCCTGAACCAGCCAAGTCCGCGTGAAGGACTAAGGC  
CCTACGGGTCGTAAACCTCTTTTGCCTGGGGATCAGTGCCAGCTCGCGAGCTGGGAGGGA

GCGTACCCGGAGAAAAAGCATCGGCTAACTCCGTGCCAGCAGCC  
>Consensus161 len=505 tot-seq=66  
AGAGTTTGATCATGGCTCAGGATGAACGCTGGCGGCGTGCTTAACACATGCAAGTCGAAC  
GGGGCAGGAGGAAACCTAGTGAATCCTGCCCTAGTGGCGGACGGGTGAGTAACGCGTGG  
GCAACCTGCCGCATACCGGGGATAACACTTAGAAATAGGTGCTAATACCGCATAAGCGC  
ACAGAGCCGCATGGCTTGGTGTGAAAACTCCGGTGGTATGCGATGGGCCCCGCGTCTGAT  
TAGCTTGTGGCGGGCAGCGGCCACCAAGGCGACGATCAGTAGCCGGCCTGAGAGGGT  
GGACGGCCACATTGGGACTGAGACACGGCCAGACTCCTACGGGAGGCAGCAGTGGGGAA  
TATTGCACAATGGGGGAACCCTGATGCAGCGACGCCGCGTGAGTGAAGAAGTATTTTCGG  
TATGTAAAGCTCTATCAGCAGGGAAGAAAATGACGGTACCTGACTAAGAAGCCCCGGCTA  
ACTACGTGCCAGCAGCCGCGGTAAT

>Consensus162 len=508 tot-seq=63  
AGAGTTTGATCATGGCTCAGGATGAACGCTGGCGGCGTGCTTAACACATGCAAGTCGAGC  
GAAGCGCTTCGTTTTGAATCTTCGGAGGAAGAACGGAATGACTGAGCGGCGGACGGGTGA  
GTAACGCGTGGGCAACCTGCCTCATAACAGGGGGATAACAGTTAGAAATGACTGCTAATAC  
CGCATAAGACCGCGGTACCGCATGGTACAGCGGTAAAACTCCGGTGGTATGAGATGGGC  
CCGCGTCTGATTAGCTAGTTGGCGGGTAACGGCCCCACCAAGGCGACGATCAGTAGCCGA  
CCTGAGAGGGTACCAGCCACATTGGGACTGAGACACGGCCAACTCCTACGGGAGGCA  
GCAGTGGGGAATATTGCACAATGGGGGAACCCTGATGCAGCGACGCCGCGTGAGCGATG  
AAGTATTTTCGGTATGTAAAGCTCTATCAGCAGGGAAGAAGATGACGGTACCTGACTAAGA  
AGCCCCGGCTAACTACGTGCCAGCAGCC

>Consensus163 len=528 tot-seq=62  
AGAGTTTGATCATGGCTCAGGATGAACGCTAGCGGCAGGCTTAACACATGCAAGTCGAGC  
GGCAGCGGGGAGGAAGCTTGCTTTCTCCGCCGGCGACCGGCGCACGGGTGAGTAACACGT  
ATGCAACCTGCCCCTGTCAGGGGACAACCCGCCGAAAGGCGGGCTAAACCCGCGTACAT  
GCCACCGGGGCATCCCGGAGGCAGGAAAGGCTTCGGCCGGACAGGGATGGGCATGCGGCC  
CATTAGGCAGTAGGCGGGGTAACGGCCACCTAACCGACGATGCGTAGGGGTTCTGAGAG  
GAAGGTCCCCCACACTGGTACTGAGACACGGACCAGACTCCTACGGGAGGCAGCAGTGA  
GGAATATTGGTCAATGGTTCGGGAGACTGAACCAGCCAAGCCGCGTGAGGGAGGAAGGTAC  
AGAGTATCGTAAACCTCTTTTGTTCAGGGAACAAAGGCGGGGACGTGTCCCCGGATGAGTG  
TACCTGAAGAAAAAGCATCGGCTAACTCCGTGCCAGCAGCCGCGGTAA

>Consensus164 len=502 tot-seq=61  
AGAGTTTGATCATGGCTCAGGATGAACGCTGGCGGCGTGCTTAACACATGCAAGTCGAAC  
GGGGATAAGACATCGGAAGAGCTGCTTGCAGAATGGAAGAAGTCATATTCTAGTGGCGGA  
CGGGTGAAGTAAACGCGTGGGCAACCTGCCTTATACAGGGGGATAACAGCTGGAAACAGCTG  
CTAATACCGCATAAGCGCACAGCGGCGCATGACGCAGTGTGAAAACTGAGGTGGTATAA  
GATGGGCCCCGCGTCTGATTAGCTGGTTGGGAGGGTAACGGCCTACCAAGGCGACGATCAG  
TAGCCGGCCTGAGAGGGCGGACGGCCACATTGGGACTGAGACACGGCCAGACTCCTACG  
GGAGGCAGCAGTGGGGAATATTGCACAATGGGGGAACCCTGATGCAGCGACGCCGCGTG  
AGTGAAGAAGTATTTTCGGTACGTAAAGCTCTATCAGCAGGGAAGAAAAAGGACGGTACC  
TGAGTAAGAAGCCCCGGCTAAC

>Consensus165 len=510 tot-seq=59  
AGAGTTTGATCCTGGCTCAGGACGAACGCTGGCGGCGTGCTTAACACATGCAAGTCGAAC  
GGAGCGCCTATGAAGGAGATTTTCGGTCAACGGAATAGGTTGCTTAGTGGCGGACGGGTGA  
GTAACGCGTGAGGAACCTGCCTTTCAGAGGGGGACAACAGTTGGAAACGACTGCTAATAC  
CGCATAACACATAGGTGTCGCATGGCATTATGTCAAAGATTTATCGCTGAGAGATGGCC  
TCGCGTCTGATTAGCTAGTTGGTAGGGTAACGGCCTACCAAGGCGACGATCAGTAGCCGG  
ACTGAGAGGTTGGCCGGCCACATTGGGACTGAGATACGGCCCAGACTCCTACGGGAGGCA  
GCAGTGGGGAATATTGGGCAATGGGCGCAAGCCTGACCCAGCAACGCCGCGTGAAGGAAG  
AAGGCTTTTCGGGTTGTAAACTTCTTTTGTTCAGGGAAGAGTAGAAGACGGTACCTGTGAA  
TAAGCCACGGCTAACTACGTGCCAGCAGCC

>Consensus166 len=413 tot-seq=57  
AGAGTTTGATCATGGCTCAGGACGAACGCTGGCGGCGTGCCCTAACACATGCAAGTCGAGC  
GAGTGGAGTTCTTCGGAACAAAGCTAGCGGCGGACGGGTGAGTAACACGTGGGCAACCTG

CCTCATAGAGGGGAATAGCCTTCCGAAAGGGAGATTAATACCGCATAAGATTGTAGCTTC  
GCATGAAGTAGCAATTAAGGAGCAATCCGCTATGAGATGGGCCCCGGCGCATTAGCTA  
GTTGGTGAGGTAACGGCTCACCAAGGCGACGATGCGTAGCCGACCTGAGAGGGTGATCGG  
CCACATTGGGACTGAGACACGGCCCAGACTCCTACGGGAGGCAGCAGTGGGGAATATTGC  
ACAATGGGGGAAACCCTGATGCAGCAACGCCGCTGAGTGATGACGGCCTCGG

>Consensus167 len=514 tot-seq=56

AGAGTTTGATCCTGGCTCAGGATGAACGCTGGCGGGCTGCTTAACACATGCAAGTCGAAC  
GGGGTACCCATGACGGAGGCTTCGGCCAACCTGAATGGACTACCTAGTGGCGGACGGGTGA  
GTAACGCGTGAGGAACCTGCCTTGGAGTGGGGAATAACAGCCAGAAATGGCTGCTAATAC  
CGCATAATGCAGTTGGGTGCGATGGCTCTGACTGCCAAAGATTTATCGCTCTAAGATGGC  
CTCGCTCTGATTAGTTTGTGGCGGGGTAACGGCCCACCAAGACGACGATCAGTAGCCG  
GACTGAGAGGTTGGCCGGCCACATTGGGACTGAGACACGGCCCAGACTCCTACGGGAGGC  
AGCAGTGGGGAATATTGGGCAATGGGCGCAAGCCTGACCCAGCAACGCCGCGTGAAGGAA  
GAAGGCCCTCGGGTTGTAACTTCTTTTGTGAGGGACGAAGAAAGTGACGGTACCTGACG  
ATAAGCCACGGCTAACTACGTGCCAGCAGCCGC

>Consensus168 len=516 tot-seq=56

AGAGTTTGATCCTGGCTCAGGATGAACGCTGGCGGGCTGCCTAACACATGCAAGTCGAAC  
GGGGTCATTAAGGAAAAATCCTTCGGGATTCGGAATTCCTGACCTAGTGGCGGACGGGTG  
AGTAACGCGTGAGCAATCTGCCTTTGGATGGGGGATAACAGCCGAAACGACTGCTAATA  
CCGCATAATGCAGCGGGACCGCATGATTTTGTGTCGCAAGATTTATCGTCCAAAGATGAG  
CTCGCTCTGATTAGCCAGTTGGCGGGGTAACGGCCCACCAAGCGACGATCAGTAGCCG  
GACTGAGAGGTTGAACGGCCACATTGGGACTGAGACACGGCCCAGACTCCTACGGGAGGC  
AGCAGTGGGGAATATTGCGCAATGGGGGAAACCCTGACGCAGCAACGCCGCGTGAGTGAA  
GAAGGCCCTCCGGTTGTAAAGGGGTAATCAGGGACGAAGAATGACGGTACCTGAAGAATAA  
GACTCCGGCTAACTACGTGCCAGCAGCCGCGGAATT

>Consensus169 len=509 tot-seq=56

AGAGTTTGATCCTGGCTCAGGATGAACGCTAGCGACAGGCTTAACACATGCAAGTCGAGG  
GGCATCATGAGGTAGCAATACCTTGATGGCGACCGGGCGCACGGGTGAGTAACGCGTATGC  
AACCTGGCTGATACAGGGGGATAGCCCATGGAAACGTGGATTAACACCCCATATAATATTAT  
TGTAAGGCATCTTATAATAATTAATCGTTTCGAGGTATCAGATGGGCATGCGTCTCTATTA  
GCTAGTTGGGGGGGTAACGGCCCACCAAGGCAATGATAGGTAGGGGTTCTGAGAGGAAGG  
TCCCCACATTGGAACCTGAGACACGGTCCAAACTCCTACGGGAGGCAGCAGTGAGGAATA  
TTGGTCAATGGGCGCAGGCCTGAACCAGCCAAGTCGCGTGAGGGAAGACTGCCCTATGGG  
TTGTAAACCTCTTTTATAAGGGAAGAATAATGACTACGTGTAGTCAGATGCCCGTACCTT  
ATGAATAAGCATCGGCTAACTCCGTGCCA

>Consensus170 len=528 tot-seq=55

AGAGTTTGATCATGGCTCAGAACGAACGCTGGCGGGCTGCTTAACACATGCAAGTCAGGG  
AGAAAGTTCCTTCGGGAGCGAGTAAACCGGCGCACGGGTGAGTAACACGTGAGTAACCTT  
CCTTTTAGACTGGAACAACCTTACCGAAAGGTGAGCTAATGCCGGATGAATTATGTAACCG  
CATGGTTATATAGAAAAAGCCGGGGCAACCTGGCGCTAAAAGATGGACTCGCGTCCCATT  
AGCTAGTTGGTGGGGTATTGGCCTACCAAGGCGACGATGGGTAGCCGGCCTGAGAGGGTG  
GCCGGCCACACTGGGACTGAGACACGGCCCAGACTCCTACGGGAGGCAGCAGTGGGGAAT  
TTTGGCCAATGCTCGAAAAGAGTGACGCAGCGACGCCGCGTGAATGACGAAGGCCTTCGGG  
TCGTAAAGTTCTTTTCGACAGGGAAGAATGTGTATAGTAGTAACTGACTATACAGTGACGG  
TACCTGTATAAGCAGCCCCGGCTAACTCCGTGCCAGCAGCCGCGGTAA

>Consensus171 len=503 tot-seq=55

AGAGTTTGATCATGGCTCAGGATGAACGCTAGCGGCAGGCTTAACACATGCAAGTCGAGG  
GGCAGCGAGAGTGATAGCAATATTACTTGTGCGGCGACCGGGCGCACGGGTGCGTAACCGGT  
ATGCAACCTACCATCAACAGGGGGATAACACTGAGAAAATGGTACTAATACCCCATATAA  
TCTCATGCGGCATCGCATGGGGTTGAAAACCTCCGGTGGTTGATGATGGGCATGCGTTGTA  
TTAGCTGGTTGGTGAGGTAACGGCTCACCAAGGCGACGATACATAGGGGGACTGAGAGGT  
TAACCCCCACATTGGTACTGAGACACGGACCAAACCTCCTACGGGAGGCAGCAGTGAGGA  
ATATTGGTCAATGGACGCAAGTCTGAACCAGCCATGCCGCGTGACGGATGACGGCTCTAT  
GAGTTGTAAACTGCTTTTGTACGAGGGTAAACCCCGATACGTGTATCGGGTTGAAAGTAT

CGTACGAATAAGGATCGGCTAAC

>Consensus172 len=519 tot-seq=54

AGAGTTTGCATCCTGGCTCAGGATGAACGCTAGCGACAGGCTTAACACATGCAAGTCGAGG  
GGCAGCGGGGAAGAGAGCTTGTCTTTTCTGCCGGCGACCGGCGCACGGGTGAGTAACAC  
GTATGCAACCTGCCCCTCACAGGGGATAAGCGGAAGAAATTCCTGCTAATACCGCGTGA  
TATCCCGAGGAGGCATCTCCTTGGGATCAAAGGAAGCGATTCCGGTGACGGATGGGCATG  
CGGCGCATTAGCTAGTCGGCGGGGTAACGGCCACCGAGGCGACGATGCGTAGGGGTTCT  
GAGAGGAAGGTCCCCCACACTGGTACTGAGACACGGACCAGACTCCTACGGGAGGCAGCA  
GTGAGGAATATTGGTCAATGGGCTGAGGCCTGAACCAGCCAAGTCGCGTGAGGGAAAGACG  
GTCCTATGGATTGTAAACCTCTTTTGCCGGGGAGCAACGACGCCACGTGTGGCGGAAGTG  
AGAGTACCCGGAGAAAAAGCATCGGCTAACTCCGTGCCA

>Consensus173 len=516 tot-seq=54

AGAGTTTGCATCCTGGCTCAGGATGAACGCTGGCGGCGTGCTTAACACATGCAAGTCGAA  
GAAGCACTGGAGAACGAATCTTCGGAGGAAGTCTCCTTTGACTGAGTGGCGGACGGGTGA  
GTAACGCGTGGGTAACCTGCCTCACACAGGGGGATAACAGTTGGAAACGACCGCTAATAC  
CGCATAAGCCGGAAGGATCGCATGATCCGGCCGAAAAGATTTATCGGTGTGAGATGGAC  
CCGCGTCTGATTAGCCAGTTGGCAGGGTAACGGCCTACCAAAGCGACGATCAGTAGCCGG  
CCTGAGAGGGTGAACGGCCACATTGGGACTGAGACACGGCCAAACTCCTACGGGAGGCA  
GCAGTGGGGAATATTGCACAATGGGGAAACCCTGATGCAGCGACGCCGCGTGAGTGAAG  
AAGTATTTCCGTATGTAAAGCTCTATCAGCAGGGAAGAAAATGACGGTACCTGACTAAGA  
AGCCCCGGCTAACTACGTGCCAGCAGCCGCGGTAAT

>Consensus174 len=530 tot-seq=53

AGAGTTTGCATCCTGGCTCAGGATGAACGCTAGCGACAGGCTTAACACATGCAAGTCGAG  
GGCAGCGGGGAGTAGCAATACTCCCGCCGGCGACCGGCGCACGGGTGAGTAACACGTAT  
GAAACCTGCCCCTAGCAGGGGGATAAGCGGAAGAAATTCCTGCTAATACCGCGTAACAAC  
CCTTGAGGCATCTCCTCGGGTTTAAAGGAAGCGATTCCGGCTACGGATGGTCATGCGTC  
GCATTAGCTAGTTGGCGGGGTAACGGCCACCAAGGCGACGATGCGTAGGGGTTCTGAGA  
GGAAGGTCCCCCACACTGGTACTGAGACACGGACCAGACTCCTACGGGAGGCAGCAGTG  
AGGAATATTGGTCAATGGGCGAGAGCCTGAACCAGCCAAGTCGCGTGAGGGAAAGACGGTC  
CTATGGATTGTAAACCTCTTTTGCCGGGGAGCAAAAAGCGGTACGTGTACCGCATCGAGA  
GTACCCGGAGAAAAAGCATCGGCTAACTCCGTGCCAGCAGCCGCGGTAAT

>Consensus175 len=495 tot-seq=51

AGAGTTTGCATCCTGGCTCAGGATAAACGCTGGCGGCGCACATAAGACATGCAAGTCGAAC  
GAACCTAACCTCTTGCTTGCAAGAGGAGCGGTTAGTGGCGGACTGGTGAGTAACACGTAA  
GAAATCTGCCTATCAGGGGGGAATAACAGTGAGAAATCATTGCTAATACCGCATATGCCA  
TAATTATCGCATGATAATAGTGGGAAAGGAGCAATCCGCTGATAGATGAGCTTGCGTCTG  
ATTAGCTAGTTGGTGGGGTAAAGGCCTACCAAGGCGACGATCAGTAGCCGGACTGAGAGG  
TTGAACGGCCACATTGGGACTGAGATACGGCCAGACTCCTACGGGAGGCAGCAGTCGGG  
AATATTGCGCAATGGAGGAACTCTGACGCAGTGACGCCGCGTATAGGAAGAAGGTTTTTC  
GGATTGTAAACTATTGTCCACAGGGAAGAAAATGACTGTACCTGTGAAGAAAGCTCCGGC  
TAACTACGTGCCAGC

>Consensus176 len=515 tot-seq=51

AGAGTTTGCATCCTGGCTCAGGACGAACGCTGGCGGCGTGCCTAACACATGCAAGTCGAAC  
GGAGATACGCGCTGAATGACGAAGCTTGCTTTTGAATTCCTTGTGTATCTTAGTGGCGGAC  
GGGTGAGTAACGCGTGAGCAACCTGCCTTTTCAGAGGGGGATAACGTTTGAAACGAACGC  
TAATACCGCATGAGACTACGGTACTACATGGTACAGTGGCCAAAGGAGCAATCCGCTGAA  
AGATGGGCTCGCGTCCGATTAGATAGTTGGCGGGGTAACGGCCACCAAGTCGACGATCG  
GTAGCCGGACTGAGAGGTTGAACGGCCACATTGGGACTGAGACACGGCCAGACTCCTAC  
GGGAGGCAGCAGTGAGGGATATTGGTCAATGGGGGAAACCCTGAACCAGCAACGCCGCGT  
GAGGGAAGACGGTTTTTCGGATTGTAAACCTCTGTCTCTGTGAAGATAATGACGGTAGCA  
GAGGAGGAAGCTCCGGCTAACTACGTGCCAGCAGC

>Consensus177 len=501 tot-seq=50

AGAGTTTGCATCCTGGCTCAGGATAAACGCTGGCGGCGCACATAAGACATGCAAGTCGAAC  
GGAAGTCGTTGTAATGATGTTGACATGAACAGAGAACTTGTTCAAAGGGAATGAAGATTG



ACTTACAACAATGGCTTTAGTGGCGGACTGGTGTAGTAACACGTAAGCAACCTGCCTATCA  
GAGGGGAACAACAGTTAGAAATGACTGCTAATACCGCATATGCCTTAGTAACTCATGTTA  
CAAAAGGGAAAGGAGCAATCCGCTGATAGATGGGCTTTCGTCTGATTAGATAGTTGGTGG  
GGTAATGGCCTACCAAGTCGACGATCAGTAGCCGGACTGAGAGGTTGAACGGCCACATTG  
GGACTGAGATACGGCCCAGACTCCTACGGGAGGCAGAGTCGGGAATATTGCGCAATGGA  
GGAAACTCTGACGCAGTGACGCCGCTGCAGGAAGAAGTTTTTCGGATTGTAAACTGCTT  
TAGACAGGGAAGAAAAAGACA

>Consensus178 len=518 tot-seq=50

AGAGTTTGATCCTGGCTCAGGATGAACGCTGGCGGCGTGCTTAACACATGCAAGTCGAAC  
GGACTCATATTGAAACCTAGTGATGTATGAGTTAGTGGCGGACGGGTGAGTAACGCGTGG  
AGAACCTGCCGTATACTGGGGGATAACACTTAGAAATAGGTGCTAATACCGCATAAGCGC  
ACAGCTTCGCATGAAGCAGTGTGAAAACAAAAAGCTAAAGCTTTTGGTGGTATACGATG  
GATCCGCGTCTGATTAGCTAGTTGGCGGGGTAAAGGCCCAAGGCGACGATCAGTAGC  
CGGCCTGAGAGGGTGAACGGCCACATTGGGACTGAGACACGGCCCAAACCTCCTACGGGAG  
GCAGCAGTGGGGAATATTGCACAATGGGGGAAACCCTGATGCAGCGACGCCGCGTGAGTG  
AGAAGTATTTTCGGTACGTAAAGCTCTATCAGCAGGGAAGAAATAAAGTCCTTTGGACTT  
TGGACGGTACCTGACTAAGAAGCCCCGGCTAACTACGT

>Consensus179 len=516 tot-seq=49

AGAGTTTGATCATGGCTCAGGACGAACGCTGGCGGCGTGCTTAACACATGCAAGTCGAAC  
GGAGCACCCCTGAAAGAGTTTTTCGGACAATGGATGGGAATGCTTAGTGGCGGACTGGTGA  
GTAACGCGTGAGGAACCTGCCTTCCAGAGGGGGACAACAGTTGGAAACGACTGCTAATAC  
CGCATGACACATTTGAATCGCATGGTTTTGAATGTCAAAGATTTATCGCTGGAAGATGGCC  
TCGCGTCTGATTAGCTAGTTGGCGGGGTAACGGCCCCACCAAGGCGACGATCAGTAGCCGG  
ACTGAGAGGTTGACCGGCCACATTGGGACTGAGATACGGCCCAGACTCCTACGGGAGGCA  
GCAGTGGGGAATATTGGGCAATGGACGCAAGTCTGACCCAGCAACGCCGCGTGAAGGAAG  
AAGGCTTTTCGGGTTGTAAACTTCTTTTAAGGGGGAAGAGCAGAAGACGGTACCCCTTGAA  
TAAGCCACGGCTAACTACGTGCCAGCAGCCGCGGTA

>Consensus180 len=512 tot-seq=49

AGAGTTTGATCCTGGCTCAGGATGAACGCTGGCGGCGTGCTTAACACATGCAAGTCGAAC  
GGGGGATGTACAGCGGGAAGATTTTCGGTTCGGACCAAGTGCATGCCTAGTGGCGGACGGGT  
GAGTAACGCGTGGGTAACCTGCCTTACACAGGGGGATAACACTTAGAAATAGGTGCTAAT  
ACCGCATGAGCGCACAGGACCGCATGGTTCGAGTGTGAAAACTGAGGTGGTGTAAAGATGG  
ACCCGCGTCTGATTAGCTAGTTGGTGGGTAACGGCCCCACCAAGGCGACGATCAGTAGCC  
GGCCTGAGAGGGTGGACGGCCACATTGGGACTGAGACACGGCCCAAACCTCCTACGGGAGG  
CAGCAGTGGGGGATATTGGGCAATGGGGGGAACCCTGATCCAGCGACGCCGCGTGAGTGA  
AGAAGTATCTCGGTATGTAAAGCTCTATCAGCAGGGAAGAAGAAATGACGGTACCTGAGT  
AGAAGCCCCGGCTAACTACGTGCCAGCAGCC

>Consensus181 len=508 tot-seq=48

AGAGTTTGATCCTGGCTCAGGATGAACGCTGGCGGCGTGCTTAACACATGCAAGTCGAAC  
GGGGTGCCTTAGAAAGAGGATTCGTCCAATTGATAAGGTTACCTAGTGGCGGACGGGTGA  
GTAACGCGTGAGTAACCTGCCCTGGAGTGGGGAATAACAGCTGGAAACAGCTGCTAATAC  
CGCATAATGCAGTTGGGTTCGCATGGCTCTGACTGCCAAAAGATTTATCGCTCTGGGATGGA  
CTCGCGTCTGATTAGCTAGTTGGTGGGGTAACGGCCCCACCAAGGCGACGATCAGTAGCCG  
GACTGAGAGGTTGGCCGGCCACATTGGGACTGAGACACGGCCCAAGACTCCTACGGGAGGC  
AGCAGTGGGGAATATTGGGCAATGGGCGCAAGCCTGACCCAGCAACGCCGCGTGAAGGAA  
GAAGGCTTTTCGGGTTGTAAACTTCTTTTGTGAGGGACGAAGCAAGTGACGGTACCTGACC  
ATAAGCCACGGCTAACTACGTGCCAGC

>Consensus182 len=505 tot-seq=48

AGAGTTTGATCATGGCTCAGGATGAACGCTGGCGGCGTGCTTAACACATGCAAGTCGAAC  
GGACCCATATTGAAACCTAGTGATATATGGGTTAGTGGCGGACGGGTGAGTAACGCGTGG  
GTAACCTGCCTTACACAGGGGGATAACACTTAGAAATAGGTGCTAAAACCGCATAAGCGC  
ACAGCTTCGCATGAAGCGGTGTGAAAACTCCGGTGGTGTAAAGATGGACCCGCGTCTGAT  
TAGCTTGTGGCGGGGTAACGGCCCCACCAAGGCGACGATCAGTAGCCGGCCTGAGAGGGC  
GGACGGCCACATTGGGACTGAGACACGGCCCAAGACTCCTACGGGAGGCAGCAGTGGGGAA

TATTGCACAATGGGGGAAACCCTGATGCAGCGACGCCGCGTGAGTGAAGAAGTAATTCGT  
TACGTAAAGCTCTATCAGCAGGGAAGAAAATGACGGTACCTGAGTAAGAAGCCCCGGCTA  
ACTACGTGCCAGCAGCCGCGTAAT

>Consensus183 len=487 tot-seq=47

AGAGTTTGCATCATGGCTCAGGATGAACGCTGGCGGCATGCCTAACACATGCAAGTCGAAC  
GAGAATCTGTGGATAGAGGATTCGTCCAATTGAAACAGAGGACAGTGGCGAACGGGTGAG  
TAATGCATGAGCAACCTGCCCTCAGAGGGGGACAACAGTTGGAAACGACTGCTAATACC  
GCATAACATATCCGGGAGGCATCTCCTGGATATCAAAGATTTATCGCTGAAGGATGGGCT  
CATGTCTGATTAGCTAGTTGGTGGGGTAACGGCCACCAAGGCTACGATCAGTAGCCGGT  
CTGAGAGGATGAACGGCCACATTGGGACTGAGATACGGCCAGACTCCTACGGGAGGCAG  
CAGTGGGGAATATTGGGCAATGGGCGCAAGCCTGACCCAGCAATGCCGCGTGAAGGAAGA  
AGGCCCTCGGGTTGTAAACTTCTTTATCAGGGACGAAGGATGTGACGGTACCTGATGAAT  
AAGCTCC

>Consensus184 len=507 tot-seq=47

AGAGTTTGCATCCTGGCTCAGGATGAACGCTGGCGGCATGCCTAAGACATGCAAGTCGAAC  
GAGACGGCCCAATGAAGACTGAGTGCTTGCACAAAGTTGGATTTGGATTCCCGTCTAGTG  
GCGCAAGGGTGAGTAACACGTGGGTAATCTACCTTTGAGTCTGGAATAACAGTTAGAAAT  
GATTGCTAATGCCGGATGATATTATGAGCGATACGTCAATCATAATTAAGAGGAGCCTTT  
AAAGCTTCGCTTAAAGATGAGCCTGCGCCGTATTAGCTAGTTGGTGGGGTAATAGCCTAC  
CAAGGCAACGATGCGTAGCCGACCTGAGAGGGTGATCGGCCACACTGGGACTGAGACACG  
GCCAGACTCCTACGGGAGACAGCAGTTAGGAATATTTCGTCAATGGGGGAAACCCTGAAC  
GAGCAATGCCGCGTGAAGGATGACGGTCTATGGATTGTAAACTTCTGTTGTTAGGGAAG  
AACGACCTAAGTAGGAAATGACTTAGG

>Consensus185 len=514 tot-seq=45

AGAGTTTGCATCATGGCTCAGGATGAACGCTGGCGGCGTGCTTAACACATGCAAGTCGAAC  
GGAGTATGAATTTGGATTTCTCACGATTGAAGAGTTCATACTTAGTGGCGGACGGGTGAG  
TAACGCGTGGATAACCTGCCCCATACCGGGGGATAACAGCCGAAACGGCTGCTAATACC  
GCATAAGCGCACGAGGCTGCATGGCCCTGTGTGAAAAACTCCGGTGGTATGGGATGGATC  
CGGTCTGATTAGCTAGTTGGTGGAGATAAAAGCCACCAAGGCGACGATCAGTAGCCGAC  
CTGAGAGGGTGGCCGGCCACATTGGGACTGAGACACGGCCAGACTCCTACGGGAGGCAG  
CAGTGGGGAATATTGCACAATGGGGGAAACCCTGATGCAGCGACGCCGCGTGAGTGAAGA  
AGTAATTCGTTATGTAAAGCTCTATCAGCAGGGAAGAAAACAGACGGTACCTGAGTAAGAA  
GCCCGGCTAACTACGTGCCAGCAGCCGCGGTA

>Consensus186 len=515 tot-seq=45

AGAGTTTGCATCATGGCTCAGGATGAACGCTGGCGGCGTGCTTAACACATGCAAGTCGAAC  
GGGGATTACACGGAGATGCGATTTCCGGTCAAATCAAGTGAATCTTAGTGGCGGACGGGT  
GAGTAACGCGTGGGTAACCTGCCTTGCACTGGGGGATAACACTTAGAAATAGGTGCTAAT  
ACCGCATAAGCGCACGGTCCCTGCATGGGACAGTGTGAAAAACTCCGGTGGTGAAGATGG  
ACCCGCGTCTGATTAGCTGGTTGGCGGGGTAAAGGCCACCAAGGCGACGATCAGTAGCC  
GGCTGAGAGGGTGGACGGCCACATTGGGACTGAGACACGGCCAAACTCCTACGGGAGG  
CAGCAGTGGGGATATTGGACAATGGGGGAAACCCTGATCCAGCGACGCCGCGTGAGTGA  
AGAAGTATTTCCGTATGTAAAGCTCTGTGAGCAGGGAAGAAAGCAATGACGGTACCTGAC  
CAAGAAGCCCCGGCTAACTACGTGCCAGCAGCCGC

>Consensus187 len=508 tot-seq=44

AGAGTTTGCATCCTGGCTCAGGATGAACGCTGGCGGCGTGCTTAACACATGCAAGTCGAGC  
GGGGTTATTGAGAGCTTGCTTTCAATAACCTTAGCGGCGGACGGGTGAGGAACACGTGG  
GTAATCTGCCCTTTGCAGAGGGATAACGTCAAGAAATGACGCTAATACCTCATAAGCTC  
CCGGCACGGCATCGTGGCGAGAGAAAAGATTTATCGGCAAAGGAGGAGCCCGCGGCTGAT  
TAGCTAGTTGGGGAGGTAACGGCTCACCAAGGCGACGATCAGTAGCCGACCTGAGAGGGT  
GATCGGCCACATTGGAACCTGAGACACGGTCCAAACTCCTACGGGAGGCAGCAGTGGGGAA  
TATTGCGCAATGGGGGAAACCCTGACGCAGCAACGCCGCGTGAAGGAGGAAGTATTTCCG  
TATGTAAACTTCTATCAGCAGGGAAGAAGGAAGTACGGTACCTGCATAAGAAGCCCCGG  
CTAATTACGTGCCAGCAGCCGCGGTAAT

>Consensus188 len=517 tot-seq=44

AGAGTTTGATCCTGGCTCAGGATGAACGCTGGCGGCGTGCTTAACACATGCAAGTCGAAC  
GAAGCACTTTACCTTGATTCCTTCGGGTTGATTGGTACTGTGACTGAGTGGCGGACGGGT  
GAGTAACGCGTGGGTAACCTGCCCCATACAGGGGGATAACAGATAGAAATGTCTGCTAAT  
ACCGCATAAGACCACAGCGCCGCATGGCGCAGGGGTAAAAACTCCGGTGGTATGGGATGG  
ACCCGCGTCTGATTAGCTAGTTGGTGGGGTAAAGGCCACCAAGGCGACGATCAGTAGCC  
GACCTGAGAGGGTGACCGGCCACATTGGGACTGAGACACGGCCAACTCCTACGGGAGG  
CAGCAGTGGGGAATATTGCACAATGGGGGAAACCCTGATGCAGCGACGCCGCGTGAAGGA  
TGAAGTATTTCCGGTATGTAACTTCTATCAGCAGGGAAGAAAATGACGGTACCTGACTAA  
GAAGCCCCGGCTAACTACGTGCCAGCAGCCGCGGTAA

>Consensus189 len=513 tot-seq=43

AGAGTTTGATCATGGCTCAGGATGAACGCTGGCGGCGTGCTTAACACATGCAAGTCGAAC  
GGGGGCGTGATGTGCGAGAGGGATAGTTTACTAGACTTCAAACTTTTTCGCGCCATAGTGG  
CGGACGGGTGAGTAACGCGTGGGTAACCTGCCATATACAGGGGGATAAACTTAGAAAATA  
GGTGCTAATACCGCATAAGCGCACAGGGGCGCATGCCCCGGTGTGAAAAACTCCGGTGGT  
ATATGATGGACCCGCGTCTGATTAGCCAGTTGGCAGGGTAACGGCCTACCAAAGCGACGA  
TCAGTAGCCGGCCTGAGAGGGCGGACGGCCACATTGGGACTGAGACACGGCCAACTCC  
TACGGGAGGCAGCAGTGGGGGATATTGCACAATGGGGGAAACCCTGATGCAGCGACGCCG  
CGTGAGTGAAGAAGTATTTCCGGTATGTAAAGCTCTATCAGCAGGGAAGAAAATGACAGTA  
CCTGACCAAGAAGCCCCGGCTAACTACGTGCCA

>Consensus190 len=514 tot-seq=43

AGAGTTTGATCATGGCTCAGGATGAACGCTGGCGGCGTGCTTAACACATGCAAGTCGAAC  
GGAGTATAAAACCGGACTTCTCACGAAAGAAGGAGTTATACTTAGTGGCGGACGGGTGAG  
TAACGCGTGGATAACCTGCCCCATACCGGGGGATAACAGCCGGAACGGCTGCTAATACC  
GCATAAGCGCACAGGAATGCATATTCCAGTGTGAAAAACTCCGGTGGTATGGGATGGATC  
CGCGTCTGATTAGCTAGTTGGCGGGATAGAGGGCCACCAAGGCGACGATCAGTAGCCGAC  
CTGAGAGGGTGGCCGGCCACATTGGGACTGAGACACGGCCAGACTCCTACGGGAGGCAG  
CAGTGGGGAATATTGCACAATGGGGGAAACCCTGATGCAGCGACGCCGCGTGAAGTA  
AGTAATTCGTTACGTAAAGCTCTATCAGCAGGGAAGAGAATGACGGTACCTGAGTAAGAA  
GCCCGGCTAACTACGTGCCAGCAGCCGCGGTAA

>Consensus191 len=453 tot-seq=40

AGAGTTTGATCATGGCTCAGGATGAATGCTGGCGGCGTGCCCTAATACATGCAAGTCGAGC  
GGTAGCAGGGCTTACACCGTGTTCCTTGATGCTCCGGGCTGTTTTTATAGCGGGAGTTTATT  
TCGAGAACGCAGTGAAGCTGCTGACGAGCGGCGGACGGCTGAGTAACGCGTGGGAACATA  
CCCCAACTGAGGGATAACTACTCGAAAGAGTGGCTAATACCGCATGTGATCTTCCGATT  
AAAGGATTTATCCGGTTTGGGAATGGCCTGCGTACGATTAGATAGTTGGCGAGGTAAAGG  
CTACCAAGTCGACGATCGTTAGATGGTTTGGAGAGGATGATCATCCAGACTGGGACTGAG  
ACACGGCCCAGACTCCTACGGGAGGCAGCAGTAGGGAACTTTTACAATGGGCGAAAAGCC  
TGATGGAGCAACGCCGCGTGCAGGATGAAGGCC

>Consensus192 len=508 tot-seq=40

AGAGTTTGATCATGGCTCAGGACGAACGCTGGCGGCGTGCCCTAACACATGCAAGTCGAAC  
GAGAATCTTATGTGTGATCCCTTCGGGGTGAACTTTTAAGAGGAAAGTGGCGGACGGGGC  
AGTAACGCGTGAGTAACCTGCCCCATAAGAGGGGGATAATCCATGGAAACGTGGACTAATA  
CCGCATATTGAATATTTACCGCATGGTAGATATTTGAAAGATTTATCGCTTATGGATGGA  
CTCGCGTCAGATTAGCTAGTTGGTGGGTAATGGCTCACCAAGGCGACGATCTGTAGCCG  
AACTGAGAGGTTGATCGGCCGCATTGGGACTGAGACACGGCCAGACTCCTACGGGAGGC  
AGCAGTGGGGAATATTGCGCAATGGGGGAAACCCTGACGCAGCAACGCCGCGTGCAGGAA  
GAAGGTCTTCGGATTGTAACTGTTGTGCGCAGGGGAAGAACAGTACGGTACCTGTG  
AGAAAGTCACGGCTAACTACGTGCCAGC

>Consensus193 len=510 tot-seq=39

AGAGTTTGATCATGGCTCAGGATGAACGCTGGCGGCGTGCTTAACACATGCAAGTCGAAC  
GAGAACCAATGGATCGAGGATTCGTCCAAGTGAAGTTGGGGAAAGTGGCGGACGGGTGAG  
TAACGCGTGAGCAATCTGCCTGGAGTGGGGAAATAACGGTTGGAACAGCCGCTAATACC  
GCATGAAGCAGTTGAGGGGCATCCCTGTGACTGCCAAAGATTTATCGCTCTGAGATGAGC  
TCGCGTCTGATTAGCTAGTTGGCGGGGCAACGGCCACCAAGGCGACGATCAGTAGCCGG

ACTGAGAGGTTGGCCGGCCACATTGGGACTGAGACACGGCCCAGACTCCTACGGGAGGCCA  
GCAGTGGGGAATATTGGGCAATGGGCGCAAGCCTGACCCAGCAACGCCGCGTGAAGGAAG  
AAGGCTTTCGGGTTGTAAACTTCTTTTCTGGGGGACGAACAAATGACGGTACCCCAGGAA  
TAAGCCACGGCTAACTACGTGCCAGCAGCC

>Consensus194 len=517 tot-seq=39

AGAGTTTGATCATGGCTCAGGATGAACGCTGGCGGCGTGCTTAACACATGCAAGTCGAAC  
GAAGCACTTAAGACGGATTACTTCGGTTTGAAGTCTTATTTGACTGAGTGGCGGACGGGT  
GAGTAACGCGTGGGTAACCTGCCTCATAACAGGGGGATAACAGTTAGAAATGACTGCTAAT  
ACCGCATAAGCGCACGGTCTCGCATGGGACAGTGTGAAAACTCCGGTGGTATGAGATGG  
ACCCGCGTCTGATTAGCTGGTGGTGGGGTAAGGGCCCACCAAGGCGACGATCAGTAGCC  
GGCCTGAGAGGGTGAACGGCCACATTGGGACTGAGACACGGCCAAACTCCTACGGGAGG  
CAGCAGTGGGGAATATTGCACAATGGGGGAAACCCTGATGCAGCGACGCCGCGTGAAGGA  
AGAAGTATTTTCGGTATGTAAACTTCTATCAGCAGGGAAGAAAATGACGGTACCTGACTAA  
GAAGCCCCGGCTAACTACGTGCCAGCAGCCGCGGTAA

>Consensus195 len=503 tot-seq=38

AGAGTTTGATCATGGCTCAGGATGAACGCTGGCGGCGTGCTTAACACATGCAAGTCGAGC  
GAAGCACTTTGATTGGATTCTTCGGATGAAGATGATTGTGACTGAGCGGCGGACGGGTGA  
GTAACGCGTGGGCAACCTGCCTTACACAGGGGGATAACAGTTAGAAATGACTGCTAATAC  
CGCATAAGACCCCAGAACC GCATGGTTCTGAGGTAAAACTCCGGTGGTGTAAAGATGGGC  
CCGCGTCTGATTAGGTAGTTGGTGAAGTAACGGCTCACCAAGCCGACGATCAGTAGCCGA  
CCTGAGAGGGTGAACGGCCACATTGGGACTGAGACACGGCCCAGACTCCTACGGGAGGCCA  
GCAGTGGGGAATATTGCACAATGGGGGAAACCCTGATGCAGCGACGCCGCGTGAAGGATG  
AAGTATTTTCGGTATGTAAAGTCTATCAGCAGGGAAGAAAATGACGGTACCTGACTAAGA  
AGCCCCGGCTAACTACGTGCCAG

>Consensus196 len=529 tot-seq=37

AGAGTTTGATCCTGGCTCAGGATGAACGCTAGCGACAGGCTTAACACATGCAAGTCGAGG  
GGCAGCGGGGGCGAAGCTTGCTTCGCCTGCCGGCGACCCGGCGCACGGGTGAGTAACACGT  
ATGCAACCTACCCCTGCAGGGGAATAACCCGGAGAAAATCCGGACTAATACCACACGGCA  
CTTTCGGGAGGCATCTTCTGAGGGTTAAAGGAGCGATCCGGCCGGGGATGGGCATGCGGC  
GCATTAGCTAGTCGGCGGGGTAACGGCCACCGAGGCGACGATGCGTAGGGGTTCTGAGA  
GGAAGGTCCCCCACACTGGTACTGAGACACGGACCAGACTCCTACGGGAGGCAGCAGTGA  
GGAATATTGGTCAATGGGCGGGAGCCTGAACCAGCCAAGTCGCGTGAGGGACGACGGTCC  
TATGGATTGTAAACCTCTTTTGTGCGGGGAACAAAGGCGCCACGGGTGGGCGGATGAGTG  
TACCCGAAGAAAAAGCATCGGCTAACTCCGTGCCAGCAGCCGCGGTAAT

>Consensus197 len=513 tot-seq=37

AGAGTTTGATCATGGCTCAGGATGAACGCTAGCTACAGGCTTAACACATGCAAGTCGAGG  
GGCAGCATGGGAGTTTGCTTGCAAACCTTCCGATGGCGACCCGGCGCACGGGTGAGTAACAC  
GTATCCAACCTGCCGATAACTCGGGGATAGCCTTTTCGAAAAGAAAGATTAATATCCGATAG  
GATATCAAGATCGCATGATCTTGATATTAAGAATTTTCGGTTATCGATGGGGATGCGTTC  
CATTAGTTAGTTGGCGGGGTAACGGCCCACCAAGACGACGATGGATAGGGGTTCTGAGAG  
GAAGGTCCCCCACATTGGAACCTGAGACACGGTCCAAACTCCTACGGGAGGCAGCAGTGA  
GAATATTGGTCAATGGACGAGAGTCTGAACCAGCCAAGTAGCGTGAAGGATGACTGCCCT  
ATGGGTTGTAAACTTCTTTTATATGGGAATAAAACAGGGTATGCATACCCTCTTGTATGT  
ACCATATGAATAAGGATCGGCTAACTCCGTGCC

>Consensus198 len=530 tot-seq=36

AGAGTTTGATCCTGGCTCAGGATGAACGCTAGCGACAGGCTTAACACATGCAAGTCGAGG  
GGCAGCGGGGGAGTAGCAATACTCCCGCCGGCGACCCGGCGCACGGGTGAGTAACACGTAT  
GAAACCTGCCCGTAGCAGGGGGATAAGCGGAAGAAAATTCGGTCTAATACCGCGTAACAAC  
CCTTGAGGCATCTCCTCGGGTTTAAAGGAAGCGATTCCGGCTACGGATGGTCATGCGTTC  
GCATTAGCTAGTTGGCGGGGTAACGGCCCACCAAGGCGACGATGCGTAGGGGTTCTGAGA  
GGAAGGTCCCCCACACTGGTACTGAGACACGGACCAGACTCCTACGGGAGGCAGCAGTGA  
AGGAATATTGGTCAATGGTTCGGGAGACTGAACCAGCCAAGCCGCGTGAGGGAGGAAGGTA  
CAGAGTATCGTAAACCTCTTTTGTGAGGGAACAAAGGCGGGGACGTGTCCCCGGATGAGT  
GTACCTGAAGAAAAAGCATCGGCTAACTCCGTGCCAGCAGCCGCGGTAAT

>Consensus199 len=499 tot-seq=33

AGAGTTTGGATCCTGGCTCAGGATGAACGCTGGCGGCGTGCTTAACACATGCAAGTCGAAC  
GAAGCACCTGAGAATGATTCTTCGGATGAAGTCTCTTGTGACTGAGTGGCGGACGGGTGA  
GTAACGCGTGGGTAACCTGCCTCACACAGGGGGATAACAGTTGGAAACGACCGCTAATAC  
CGCATAACCCGCTGGTGCCGCATGGCACTGACGGAAAAGATTTTATCGGTGTGAGATGGA  
CCCAGCTCTGATTAGCCAGTTGGCAGGGTAACGGCTACCAAAGCGACGATCAGTAGCCG  
GCCTGAGAGGGTGAACGGCCACATTGGGACTGAGACACGGCCAGACTCCTGCGGGAGGC  
AGCAGTGGGGAATATTGCACAATGGGGGAAACCCTGATGCAGCGACGCCGCGTGAGTGAA  
GAAGTATTTTCGGTATGTAAAGCTCTATCAGCAGGGAAAGAAAATGACGGTACCTGATTAAG  
AAGCCCCGGCTAACTACGT

>Consensus200 len=518 tot-seq=32

AGAGTTTGGATCATGGCTCAGGACGAACGCTGGCGGCGGCCTAACACATGCAAGTCGAAC  
GGGACTATCTCGGAAGAAGTTTTTCGGATGGATTTTGGGATAGTTTGTAGTGGCGGACGGGTG  
AGTAACACGTGAGCAACCTGCCTTCGAGAGGGGAATAACGGCTGGAAACGGTCGCTAATA  
CCGCATAATGTACGGATGGGACATCCTGTCTGTACCAAAGATTTTATCGCTCGAAGATGGG  
CTCGCGTCCGATTAGGTAGTTGGTGAGGTAACGGCCACCAAGCCGACGATCGGTAGCCG  
GACTGAGAGGTTGAACGGCCACATTGGGACTGAGACACGGCCAGACTCCTACGGGAGGC  
AGCAGTGGGGGATATTGCACAATGGGGGAAACCCTGATGCAGCGACGCCGCGTGTGGGAA  
GACGGTCTTCTGGATTGTAAACCACTGTCCCAGGGACGAAAATGACGGTACCTGGGGAG  
GAAGCTCCGGCTAACTACGTGCCAGCAGCCGCGGTAAT

>Consensus201 len=527 tot-seq=32

AGAGTTTGGATCCTGGCTCAGGATGAACGCTAGCGACAGGCTTAACACATGCAAGTCGAGG  
GGCAGCGGGGAGGTAGCAATACTTCCGCCGGCGACCCGGCGCACGGGTGAGTAACACGTAT  
GGAACCTGCCCCTAGCAGGGGGATAAGCGGAAGAAAATTCGGTCTAATACCGCGTAATAAC  
TCCGAGAGGCATCTCATGGAGTTTAAAGGGTAACACCGGCTACGGATGGCCATGCGGCGC  
ATTAGCTAGTTGGCGGGGTAACGGCCACCAAGGCGACGATGCGTAGGGGTTCTGAGAGG  
AAGGTCCCCCACACTGGTACTGAGACACGGACCAGACTCCTACGGGAGGCAGCAGTGAG  
GAATATTGGTCAATGGCCGGAAGGCTGAACCAGCCAAGCCGCGTGAAGGACGAAGGTGCC  
AAGCATTGTAAACTTCTTTTGTCAAGGGACAAAATCAGGCTCGAGAGCCTGACCGAGGGT  
ACTTGAAGAAAAGCATCGGCTAACTCCGTGCCAGCAGCCGCGGTAA

>Consensus202 len=512 tot-seq=32

AGAGTTTGGATCATGGCTCAGGACGAACGCTGGCGGCGTGCCCTAACACATGCAAGTCGAAC  
GGAGCTAGACGCTGAGGACGTAGCTTGCTATTGAATCTTGTTTAGCTTAGTGGCGGACGG  
GTGAGTAACGCGTGAGCAACCTACCTTTTCAGAGGGGGATAACGTTTGGAAACGAACGCTA  
ATACCGCATGATATTATTGGGCAGCATTGCCTGATAATCAAAGGAGCAATCCGCTGAAAAG  
ATGGGGCTCGCGTCCGATTAGGTAGTTGGCGGGGTAACGGCCACCAAGCCGACGATCGG  
TAGCCGGACTGAGAGGTTGAACGGCCACATTGGGACTGAGACACGGCCAGACTCCTACG  
GGAGGCAGCAGTGAGGGATATTGGTCAATGGGGGAAACCCTGAACCAGCAACGCCGCGTG  
AGGGAAGACGGTTTTTCGGATTGTAAACCTCTGTCTCTGTGAAGATGATGACGGTAGCAG  
AGGAGGAAGCTCCGGCTAACTACGTGCCAGCA

>Consensus203 len=513 tot-seq=32

AGAGTTTGGATCATGGCTCAGGACGAACGCTGGCGGCACGCCTAACACATGCAAGTCGAAC  
GGGGTATTGGATGCTTGCATCAAATACCTAGTGGCGGACGGGTGAGTAACACGTGAGCAA  
CTGCCTCTCAGAGGGGGATAACGTTTGGAAACGAACGCTAATACCGCATGAAATATTGG  
CATCGCATGGTGCTGATATCAAAGGAGCAATCCGCTGAGAGATGGGCTCGCGTCCGATTA  
GATAGTTGGCGGGGTAACGGCCACCAAGTCGGCGATCGGTAGCCGGACTGAGAGGTTGA  
ACGGCCACATTGGGACTGAGACACGGCCAGACTCCTACGGGAGGCAGCAGTGGGGGATA  
TTGCACAATGGGGGAAACCCTGATGCAGCGATGCCGCGTGAGTGAAGACGGCCTCGGTTG  
TAAGGGGGGTACGCGTCCGAGAGGACGGAAAACGAAGTAACGGTAACGTACCGTAGT  
TAACGTAAGGTAACGTACCGGTACCGTAACCGT

>Consensus204 len=510 tot-seq=32

AGAGTTTGGATCCTGGCTCAGGACGAACGCTGGCGGCGTGCTTAACACATGCAAGTCGAAC  
GGAGTGCTCCGGAAAGAGATTTTCGGTCAATGGATGGAGTTACTTAGTGGCGGACGGGTGA  
GTAACGCGTGAGGAACCTGCCTTTCAGAGGGGGACAACAGTTGGAAACGACTGCTAATAC

CGCATAACGCATAGGTATCGCATGGTATCTGTGCCAAAGATTTATCGCTGAGAGATGGCC  
TCGCGTCTGATTAGCTAGTTGGTGAGGTAACGGCCCACCAAGGCGACGATCAGTAGCCGG  
ACTGAGAGGTTGGCCGGCCACATTGGGACTGAGATACGGCCCAGACTCCTACGGGAGGCA  
GCAGTGGGGAATATTGGGCAATGGGCGCAAGCCTGACCCAGCAACGCCGCGTGAAGGAAG  
AAGGCTTTCGGGTTGTAAACTTCTTTTAAGAGGGAAGAGCAGAAGACGGTACCTCTTGAA  
TAAGCCACGGCTAACTACGTGCCAGCAGCC

>Consensus205 len=532 tot-seq=31

AGAGTTTGATCCTGGCTCAGGATGAACGCTAGCGACAGGCTTAACACATGCAAGTCGAGG  
GGCAGCGGGAAGGTTAGCTTGCTAACCTTTGCCGGCGACCGGCGCACGGGTGAGTAACAC  
GTATGCAACCTGTCCGGTACAGGGGATAAGCGGCGGAAACGCCGTCTAATACCGCGTGA  
CAACCCGAGGGGGCATCCCCTTGGGTTCAAAGGAGAGATCCGGTACCGGCTGGGCATGCG  
GCGCATTAGCTAGTTGGCGGGGCAACGGCCCACCAAGGCGACGATGCGTAGGGGTTCTGA  
GAGGAAGTCCCCCACACTGGAAGTGAACACGGTCCAGACTCCTACGGGAGGCAGCAG  
TGAGGAATATTGGTCAATGGGCGGGAGCCTGAACCAGCCAAGCCGCGTGAGGGAAGAAGG  
TACAGCGTATCGTAAACCTCTTTTGTGTCAGGGAACAAAGCGGGGACTAGTCCCCGGATGA  
GGGTACCTGAAGAAAAAGCATCGGCTAACTCCGTGCCAGCAGCCGCGGTAAT

>Consensus206 len=495 tot-seq=30

AGAGTTTGATCCTGGCTCAGGATGAACGCTGGCGGCGTGCCTAACACATGCAAGTCGAGC  
GGAGCAATCTTGATGAAGTTTTTCGGATGGAATCAGGATTGACTTAGCGGCGGACGGGTGA  
GTAACACGTGGATAAACCTGCCTTATACTGGGGGATAACAGCCAGAAATGGCTGCTAATAC  
CGCATAAGCGCACGGCGCCGCATGGCGCAGTGTGAAAACTCCGGTGGTATAAGATGGAT  
CCGCGCCTGATTAGCTAGTTGGCGGGGACGCGGCCACCAAGGCGACGATCAGTAGCCGG  
CCTGAGAGGGGCGACCGGCCACATTGGGACTGAGACACGGCCAAACTCCTACGGGAGGCA  
GCAGTGGGGAATATTGCACAATGGGGGAAACCCTGATGCAGCGACGCCGCGTGAGTGAAG  
AAGTATTTTCGGTATGTAAAGCTCTATCAGCAGGGAAGAAGATGACGGTACCTGACTAAGA  
AGCCCCGGCTAACTA

>Consensus207 len=512 tot-seq=29

AGAGTTTGATCCTGGCTCAGGATGAACGCTGGCGGCGTGCCTAACACATGCAAGTCGAAC  
GGAGTTAACATTTTTTAAAGCAAATAGCTTGCTAGGAGTGGAGAAGGTGTTAACTTAGTGG  
CGGACGGGTGAGTAACCGGTGGGTAACCTGCCGTATGCAGGGGGATAACACTTAGAAAATA  
GGTGCTAACACCGCATAAGCGCACGAGAGCGCATGCTTTTTGTGTGAAAACTCCGGTGGC  
ATACGATGGACCCGCGTCTGATTAGCCAGTTGGCAGGGTAACGGCCTACCAAAGCGACGA  
TCAGTAGCCGGCCTGAGAGGGCGGACGGCCACATTGGGACTGAGACACGGCCCAAACCTCC  
TACGGGAGGCAGCAGTGGGGGATATTGCACAATGGGGGAAACCCTGATGCAGCGACGCCG  
CGTGAGTGAAGAAGTATTTTCGGTATGTAAAGCTCTATCAGCAGGGAAGAAGATGACAGTA  
CCTGAGTAAGAAGCCCCGGCTAACTACGTGCC

>Consensus208 len=530 tot-seq=28

AGAGTTTGATCATGGCTCAGGATGAACGCTAGCGACAGGCTTAACACATGCAAGTCGAGG  
GGCAGCGGGGAGTAGCAATACTCCCGCCGGCGACCGGCGCACGGGTGAGTAACACGTAT  
GAAACCTGCCCGTAGCAGGGGGATAAGCGGAAGAAATTCGGTCTAATACCGCGTAAACAAC  
CCTTGGAGGCATCTCCTCGGGTTTTAAAGGAAGCGATTCCGGCTACGGATGGTCATGCGTC  
GCATTAGCTAGTTGGCGGGGTAACGGCCCACCAAGGCGACGATGCGTAGGGGTTCTGAGA  
GGAAGTCCCCCACACTGGTACTGAGACACGGACCAGACTCCTACGGGAGGCAGCAGTG  
AGGAATATTGGTCAATGGCCGGAAGGCTGAACCAGCCAAGCCGCGTGAAGGACGAAGGTG  
CCAAGCATTGTAAACTTCTTTTGTCAAGGGACAAAATCAGGCTCGAGAGCCTGACCGAGG  
GTACTTGAAGAAAAAGCATCGGCTAACTCCGTGCCAGCAGCCGCGGTAAT

>Consensus209 len=516 tot-seq=26

AGAGTTTGATCCTGGCTCAGGATGAACGCTGGCGGCGTGCCTAACACATGCAAGTCGAGG  
GGAGTTTTAAAGCGGAAGTTTTTCGGATGGAAGCAGTAAACCTTAGCGGCGGACGGGTGAG  
TAACGCGTGGGTAACCTGCCTCATAAGGGGGATAACAGTTAGAAATGACTGCTAAAACC  
GCATAAGCGCACATTGTGAGTGACAGAGTGTGAAAACTCCGGTGGTATGAGATGGACC  
CGCGTCTGATTAGCTAGTTGGTGAGGTAACGGCCCACCAAGGCGACGATCAGTAGCCGGC  
CTGAGAGGGCGACCGGCCACATTGGGACTGAGACACGGCCCAAACCTCCTACGGGAGGCAG  
CAGTGGGGAATATTGCACAATGGGGGAAACCCTGATGCAGCGACGCCGCGTGAGTGAAGA

AGTATTTCCGGTATGTAAAGCTCTATCAGCAGGGAAGAAGAAAGACGGTACCTGACTAAGA  
AGGCCCGGCTAACTACGTGCCAGCAGCCGCGGTAAT

>Consensus210 len=503 tot-seq=26

AGAGTTTGATCATGGCTCAGGACGAACGCTGGCGGCGTGCCTAACACATGCAAGTCGAAC  
GGGGCGAGGAAAGCTTGGCTTTCTGAGCCTAGTGGCGGACGGGTGAGTAACGCGTGAGTAA  
CCTGCCTTTTCAGAGGGGGATAACATCCTGAAAAGGATGCTAATACCGCATGATATCTTTT  
TATCGCATGGTAGAGAGATCAAAGGAGCAATCCGCTGAAAGATGGACTCGCGTCCGATTA  
GCCAGTTGGCGGGGTAACGGCCACCAAAGCGACGATCGGTAGCCGGACTGAGAGGTTGA  
ACGGCCACATTGGGACTGAGACACGGCCAGACTCCTACGGGAGGCAGCAGTGGGGGATA  
TTGCACAATGGGGGAAACCCTGATGCAGCAACGCCGCGTGAGTGAAGAAGGTCTTCGGAT  
TGTAAGCTCTGTTCTTGGTGAAGATAATGACGGTAGCCAAGGAGAAAGCTCCGGCTAAC  
TACGTGCCAGCAGCCGCGGTAAT

>Consensus211 len=512 tot-seq=25

AGAGTTTGATCCTGGCTCAGGACGAACGCTGGCGGCGTGCCTAACACATGCAAGTCGAAC  
GGGGTGCCTATGAAAGAGATTTCCGGTCAATGGATTAGGTTACTTAGTGGCGGACGGGTGA  
GTAACGCGTGAGGAACCTGCCTTTTCAGAGGGGGACAACAGCTGGAAACGGCTGCTAATAC  
CGCATGACACATATTTATCGCATGGTAGATATGTCAAAGATTTATCGCTGAGAGATGGCC  
TCGCGTCTGATTAGCTAGTTGGTAGGGTAACGGCCTACCAAGGCGACGATCAGTAGCCGG  
ACTGAGAGGTTGGCCGGCCACATTGGGACTGAGATACGGCCAGACTCCTACGGGAGGCA  
GCAGTGGGGAATATTGGGCAATGGGCGCAAGCCTGACCCAGCAACGCCGCGTGAAGGAAG  
AAGGCTTTCCGGTTGTAAACTTCTTTTAAGAGGGAAGAGCAGAAGACGGTACCTCTTGAA  
TAAGCCACGGCTAACTACGTGCCAGCAGCCG

>Consensus212 len=506 tot-seq=25

AGAGTTTGATCCTGGCTCAGGATGAACGCTGGCGGCGTGCCTAATACATGCAAGTCGAAC  
GCATATCTTCGGATATGAGTGGCGAACGGGTGAGTAATACATAAGTAACCTGGCCTTAAG  
AGGGGGATAACTATTAGAAATGATAGCTAAGACCCGATAGGTATGAAGATCGCATGATCG  
ACATATTAATATCCCAAGGGATAGCTGAAGGATGGACTTATGGCGCATTAGCTAGTTGG  
TAGGGTAACGGCCTACCAAGGCGACGATGCGTAGCCGACCTGAGAGGGTGGACGGCCACA  
CTGGGACTGAGACACGGCCAGACTCCTACGGGAGGCAGCAGTAGGGAATTTTCGGCAAT  
GGGGGGAACCCTGACCGAGCAACGCCGCGTGAGGGAGGAAGTATTTCCGGTATGTAAACCT  
CTGTTATAAAGGAAGAACGGTGCATGTAGGGAATGACATGCAAGTGACGGTACTTTATGA  
GGAAGCCACGGCTAACTACGTGCCAG

>Consensus213 len=493 tot-seq=25

AGAGTTTGATCATGGCTCAGGACGAACGCTGGCGGCGTGCCTAATACATGCAAGTCGAGC  
GAGCTGAACCAGCAGATTCACCTTCGGTGATGACGCTGGGAACGCGAGCGGCGGATGGGTG  
AGTAACACGTGGGTAACTGCCCTAAAGTCTGGGATAACACCTGGAAACAGATGCTAATA  
CCGGATAACAACACTAGACGCATGTCTAGAGTTTGAAAGATGGTTCTGCTATCACTCTTG  
GATGGACCTGCGGTGCATTAGCTAGTTGGTAAGGTAACGGCTTACCAAGGCAATGATGCA  
TAGCCGAGTTGAGAGACTGATCGGCCACATTGGGACTGAGACACGGCCAAACTCCTACG  
GGAGGCAGCAGTAGGGAATCTTCCACAATGGACGAAAAGTCTGATGGAGCAACGCCGCGTG  
AGTGAAGAAGGGTTTCGGCTCGTAAAGCTCTGTTGGTAGTGAAGAAAGATAGAGGTAGTA  
ACTGGCCCTTATT

>Consensus214 len=528 tot-seq=25

AGAGTTTGATCATGGCTCAGGATGAACGCTAGCGACAGGCTTAACACATGCAAGTCGAGG  
GGCAGCGGGGTAGTGGCAACACTTCCGCCGGCGACCGGCGCACGGGTGAGTAACACGTAT  
GAAACCTGCCCGCAGCAGGGGGATAAGCGGAAGAAATTCGGTCTAATACCGCGTAACGAC  
CGACGGGGGCATCCCTGTTGGTTCAAAGGAGCGATCCGGCTGCGGATGGTCATGCGGCGC  
ATTAGCTAGTTGGCGGGCAACGGCCACCAAAGGCGACGATGCGTAGGGGTTCTGAGAGG  
AAGGTCCCCACACTGGTACTGAGACACGGACCAGACTCCTACGGGAGGCAGCAGTGAGG  
AATATTGGTCAATGGGCGCGAGCCTGAACCAGCCAAGTCGCGTGAGGGAAAGACGGTCCTA  
TGGATTGTAAACCTCTTTTGTGGGGAGCAAAGGACGCCACGTGTGGCGTTCCGAGAGTA  
CCCGAAGAAAAAGCATCGGCTAACTCCGTGCCAGCAGCCGCGGTAAAA

>Consensus215 len=521 tot-seq=25

AGAGTTTGATCATGGCTCAGGATGAACGCTGGCGGCGTGCCTAACACATGCAAGTCGAAC

GGATCCATACTGAAACCTAGTGATGTATGGATTAGTGGCGGACGGGTGAGTAACGCGTGG  
ATAACCTGCCGTATACAGGGGGATAACACTTAGAAATAGGTGCTAATACCGCATAAGCGC  
ACGGTTCCGCATGGAACAGTGTGAAAACTCCGGTGGTATACGATGGATCCGCGTCTGAT  
TAGCCAGTTGGCGGGGTAACGGCCACCAAAGCGACGATCAGTAGCCGGCCTGAGAGGGT  
GAACGGCCACATTGGGACTGAGACACGGCCAACTCCTACGGGAGGCAGCAGTGGGGAA  
TATTGCACAATGGGGGAAACCCTGATGCAGCGACGCCGCGTGAGTGAAGAAGTATTTCCG  
TACGTAAAGCTCTATCAGCAGGGAAGAAAAAGTACCTTTGGACTTTGGACGGTACCTGA  
CCAAGAAGCCCCGGCTAACTACGTGCCAGCAGCCGCGGTAA

>Consensus216 len=527 tot-seq=24

AGAGTTTGATCATGGCTCAGGATGAACGCTAGCGACAGGCTTAACACATGCAAGTCGAGG  
GGCAGGGGGGAGGTAGCAATACTTCCGCCGGCGACCGGCGCACGGGTGAGTAACACGTAT  
GGAACCTGCCCCGTAGCAGGGGGATAAGCGGAAGAAATTCGGTCTAATACCGCGTAATAAC  
TCCGAGGGGCATCCCTTGGGGTTTAAAGGGTAACACCGCTACGGATGGCCATGCGGCGC  
ATTAGCTAGTTGGCGGGGCAACGGCCACCAAGGCGACGATGCGTAGGGGTTCTGAGAGG  
AAGTCCCCCACACTGGTACTGAGACACGGACCAGACTCCTACGGGAGGCAGCAGTGAAG  
AATATTGGTCAATGGCCGGGAGGCTGAACCAGCCAAGCCGCGTGAGGGAGGAAGGTACAG  
AGTATCGTAAACCTCTTTTGGCGGGGAGCAAAGGCGGGGACGTGTCCCCGGATGAGTGTA  
CCTGAAGAAAAAGCATCGGCTAACTCCGTGCCAGCAGCCGCGGTAA

>Consensus217 len=526 tot-seq=23

AGAGTTTGATCATGGCTCAGGATGAACGCTAGCGACAGGCTTAACACATGCAAGTCGAGG  
GGCAGCGGGGTAGTGGAACACTTCCGCCGGCGACCGGCGCACGGGTGAGTAACACGTAT  
GAAACCTGCCCCGAGCAGGGGGATAAGCGGAAGAAATTCGGTCTAATACCGCGTAACAAC  
CGACGGGGGCATCCCTGTTGGTTCAAAGGAGCGATCCGGCTGCGGATGGTCATGCGGCGC  
ATTAGCTAGTTGGCGGGGCAACGGCCACCAAGGCGACGATGCGTAGGGGTTCTGAGAGG  
AAGTCCCCCACACTGGTACTGAGACACGGACCAGACTCCTACGGGAGGCAGCAGTGAAG  
AATATTGGTCAATGGTCGGGAGACTGAACCAGCCAAGCCGCGTGAGGGAGGAAGGTACAG  
AGTATCGTAAACCTCTTTTGTGTCAGGGAACAAAGGCGGGGACGTGTCCCCGGATGAGTGTA  
CCTGAAGAAAAAGCATCGGCTAACTCCGTGCCAGCAGCCGCGGTAA

>Consensus218 len=519 tot-seq=23

AGAGTTTGATCATGGCTCAGGATGAACGCTAGCGACAGGCTTAACACATGCAAGTCGAGG  
GGCAGCGGGGTTGTAGCAATACTGCCGGCGACCGGCGCACGGGTGAGTAACACGTAT  
GTAACCTGCCCTCTGCAGGGGGATAAGCGGAAGAAATTCGGTCTAATACCGCATAATACA  
ATTTGGAGACATCTCCGGGTTGTCAAAGGAGTGATCCGGCAGAGGATGGACATGCGGCGC  
ATTAGCTAGTTCGGCGGGGTAACGGCCACCGAGGCTACGATGCGTAGGGGTTCTGAGAGG  
AAGTCCCCCACACTGGTACTGAGACACGGACCAGACTCCTACGGGAGGCAGCAGTGAAG  
AATATTGGTCAATGGGCGGAAGCCTGAACCAGCCAAGTCGCGTGAGGGAAAGACGGTCCCTA  
TGGATTGTAAACCTCTTTTGTGTCGGGGAGCAAAGACGCCACGTGTGGCGTTCCGAGAGTA  
CCCGAAGAAAAAGCATCGGCTAACTCCGTGCCAGCAGCC

>Consensus219 len=531 tot-seq=23

AGAGTTTGATCATGGCTCAGGATGAACGCTGGCGGCGTGCCTAACACATGCAAGTCGAAC  
GGGCCGCGCCTGAAACCTAGTGAAGGCGCGGCCAGTGGCGGACGGGTGAGTAACGCGTGG  
GCAACCTGCCGCGCACAGGGGGACAACGGCCGGAACGGCCGCTAATACCGCATAGTCCC  
GCGGGGCGCATGGCCCTGCGGGGAAAGCCCGGGGCGACCCGGACGGTGC GCGATGGGCC  
CGCGTCCGATTAGCTGGTTGGCGGGGACGCGGCCACCAAGGCGACGATCGGTAGCCGGC  
CTGAGAGGGCGGACGGCCACACTGGGACTGAGACACGGCCAGACTCCTGCGGGAGGCAG  
CAGTGGGGAAATATTGCACAATGGGGGGAACCCTGATGCAGCGACGCCGCGTGGGTGAAGG  
AGCACCTCGGTGCGTAAAGCCCTATCGGCAGGGAAGAAAAGCGAACAGGTTGCGCTGGAC  
GGTACCTGACTAAGAAGCCCCGGCTAACTACGTGCCAGCAGCCGCGGTAA

>Consensus220 len=519 tot-seq=22

AGAGTTTGATCATGGCTCAGGATGAACGCTGGCGGCGTGCCTAACACATGCAAGTCGAAC  
GGGGTTATCATTTTTGAAGCAATTAGCTTGCTAAGAGTGGAAATGTTGATAACTTAGTGG  
CGGACGGGTGAGTAACGCGTGGGGAACCTGCCTTGCAACGGGGGATAACACTTAGAAATA  
GGTGCTAATACCGCATAAGCGCACAGAGCCGCATGGCTCGGTGTGAAAACTCCGGTGGT  
GCAAGATGGACCCGCGTCTGATTAGCTGGTTGGCGGGGTAACGGCCACCAAGGCGACGA



TCAGTAGCCGGCCTGAGAGGGTGAACGGCCACATTGGGACTGAGACACGGCCCCAACTCC  
TACGGGAGGCAGCAGTGGGGAATATTGGACAATGGGGGAAACCCTGATCCAGCGACGCCG  
CGTGAGTGAAGAAGTATTTCCGGTATGTAAAGCTCTATCAGCAGGGAAGAAAATGACGGTA  
CCTGACTAAGAAGCCCCGGCTAACTACGTGCCAGCAGCC

>Consensus221 len=530 tot-seq=22

AGAGTTTGATCCTGGCTCAGGATGAACGCTAGCGACAGGCTTAACACATGCAAGTCGAGG  
GGCAGCGGGGAGTAGCAATACTCCCGCCGGCGACCGGCGCACGGGTGAGTAACACGTAT  
GAAACCTGCCCCTAGCAGGGGGATAAGCGGAAGAAATTCGGTCTAATACCGCGTAACAAC  
CCTTGGAGGCATCTCCTCGGGTTTAAAGGAAGCGATTCCGGCTACGGATGGTCATGCGTC  
GCATTAGCTTGTGGCGGGTAACGGCCACCAAGGCGACGATGCGTAGGGGTTCTGAGA  
GGAAGTCCCCCACACTGGTACTGAGACACGGACCAGACTCCTACGGGAGGCAGCAGTG  
AGGAATATTGGTCAATGGCCGAGAGGCTGAACCAGCCAAGTCGCGTGAGGGAAGACGGCC  
CTACGGGTTGTAAACCTCTTTTGTGCGGGGAGCAAAGCGAGTCACGTGTGACTCATTGAGA  
GTACCCGAAGAAAAAGCATCGGCTAACTCCGTGCCAGCAGCCGCGGTAAT

>Consensus222 len=500 tot-seq=20

AGAGTTTGATCATGGCTCAGGATGAACGCTGGCGGGCTGCTTAACACATGCAAGTCGAAC  
GATTAACCCACCTTCGGGTGGTTATAGAGTGGCGAACGGGTGAGTAACACGTGACCAACC  
TGCCCCAGACATCGGGACAACCATTGGAAACGATGGCTAATACCGAATACTCTCTTCCTT  
CCTCATGGCGGGAAGAGGAAAAGCTCAGGCGGTCTGGGATGGGGTCGCGGCCCATCAGGTA  
GTAGGCGGGGTAACGGCCCACCTAGCTTATGACGGGTAGCCGGACTGAGAGGTCGACCGG  
CCACATTGGGACTGAGATACGGCCAGACTCCTACGGGAGGCAGCAGTGGGGGATATTGG  
ACAATGGGGGAAACCCTGATCCAGCGATGCCGCGTGAGGGAAGAAGGTTTTTCGGATTGTA  
AACCTCTGTGGAGGGGGACGATAATGACGGTACCCCTTTAGGAAGCCACGGCTAACTACG  
TGCCAGCAGCCGCGGTAATT

>Consensus223 len=499 tot-seq=20

AGAGTTTGATCATGGCTCAGGATGAACGCTGGCGGGCTGCTTAACACATGCAAGTCGAAC  
GATTAACCCGCCCTCGGGCGGACATAGAGTGGCGAACGGGTGAGTAACACGTGACCAACC  
TGCCCCGCGCTCCGGGACAACCCTGGAAACGGCGGGCTAATACCGGATACTCCGGGAGGG  
CCCCATGGCCCTGCCGGGAAAGCCGAGACGGCGCGGGATGGGGTCGCGGCCCATTAGGTA  
GACGGCGGGGTAACGGCCCACCGTGCCCGCGATGGGTAGCCGGACTGAGAGGTCGACCGG  
CCACATTGGGACTGAGATACGGCCAGACTCCTACGGGAGGCAGCAGTGGGGAAATTTTGC  
GCAATGGGGGAAACCCTGACGCAGCAACGCCGCGTGCGGGACGAAGGCCCTCGGGTTGTA  
AACCGCTTTTCAGCAGGGAAGATCCAAGACGGTACCTGCAGAAGAAGCTCCGGCTAACTAC  
GTGCCAGCAGCCGCGGTAAT

>Consensus224 len=506 tot-seq=20

AGAGTTTGATCCTGGCTCAGGATGAACGCTAGCTACAGGCTTAACACATGCAAGTCGAGG  
GGCATCATGGCGGTGCGTTGCGACCGCTGATGGCGACCGGCGCACGGGTGCGTAACGCGT  
ATCGAACCTGCCGCATACCCGGGGATAGCCTTGCGAAAAGCAAGATTAATACCCGATGTTT  
TCACTGTTCCGCATGTTACGGTGAGCAAAGAATTTCCGGTATGCGATGGCGATGCGTCCCA  
TTAGCTAGTTGGCGGGGTAACGGCCCACCAAGGCTCCGATGGGTAGGGGTTCTGAGAGGA  
AGGTCCCCCACACTGGTACTGAGACACGGACCAGACTCCTACGGGAGGCAGCAGTGAGGA  
ATATTGGTCAATGGCCGCGAGGCTGAACCAGCCAAGTCGCGTGAGGGATGACGGTCTTAT  
GGATTGTAAACCTCTTTTGTGCGGGGAGCAAAGGGCGGCACGTGTGGGGTTTTTGCAGTAC  
CTGAAGAAAAAGAATCGGCTAACTCC

>Consensus225 len=505 tot-seq=19

AGAGTTTGATCCTGGCTCAGGATGAACGCTGGCGGGCTGCTTAACACATGCAAGTCGAAC  
GGGGTGCCCTTGAAGGAGTTTTTCGGACAACAGATAGGGTTACTTAGTGGCGGACGGGTGA  
GTAACGCGTGAGGAACCTGCCCTGGAGTGGGGAATAACAGCTGGAACAGCTGCTAATAC  
CGCATGATGCAGTTGGGCCGATGGCTCTGACTGCCAAAAGATTTATCGCTCTGAGATGGA  
CTCGCGTCTGATTAGCTAGTTGGCGGGGTAACGGCCCACCAAGGCGACGATCAGTAGCCG  
GACTGAGAGGTTGCCGGCCACATTGGGGACTGAGACACGGCCCAGACTCCTACGGGAGGC  
AGCAGTGGGGAAATATTGGGCAATGGGCGCAAGCCTGACCCAGCAACGCCGCGTGAAGGAA  
GAAGGCTTTTCGGGTGTAAACTTCTTTGTCTAGGGACGAAGCAAGTGACGGTACCTGACGA  
ATAAGCCACGGCTAACTACGTGCCA

>Consensus226 len=529 tot-seq=19

AGAGTTTGGATCATGGCTCAGGATGAACGCTAGCGGCAGGCTTAACACATGCAAGTCGAGG  
GGCAGCGGGGAGGAAGCTTGCCTTCTCCGCCGGCGACCGGCGCACGGGTGAGTAACACGT  
ATGCAACCTGCCTCTGTCAGGGGTATAACTCTGCGAAAAGTAGGGCTAATACCGCGTATAT  
TCCCGGAGGGCATCCTCCGGGGAGGAAAGGTTTCGGCCGGACAGAGATGGGCATGCGGCG  
CATTAGGCAGTTGGCGGGGTAACGGCCCACCAAACCGACGATGCGTAGGGGTTCTGAGAG  
GAAGGTCCCCCACACTGGTACTGAGACACGGACCAGACTCCTACGGGAGGCAGCAGTGAG  
GAATATTGGTCAATGGCCGGAAGGCTGAACCAGCCAAGCCGCGTGAAGGACGAAGGTGCC  
AAGCATTGTAAACTTCTTTTGTCAAGGGACAAAATCAGGCTCGAGAGCCTGACCGAGGGT  
ACTTGAAGAAAAGCATCGGCTAACTCCGTGCCAGCAGCCGCGGCAATT

>Consensus227 len=531 tot-seq=19

AGAGTTTGGATCCTGGCTCAGGATGAACGCTAGCGGCAGGCTTAACACATGCAAGTCGAGG  
GGCAGCGGGGGGCGCGCTTGCAGCTCCCGCCGGCGACCGGCGCACGGGTGAGTAACACGT  
ATGCAACCTGCCCCCGCCAGGGGTACAACCCTCCGAAAAGGGGGGCTGATACCGCGTACAT  
CCCCCGGGGGCATCCCCGGGGGAGGAAAGCCCTTCTGGGCGGGCGGGGATGGGCATGCGG  
CGCATTAGGAAGACGGCGGTGTGACGGACCACCGTTCCGACGATGCGTAGGGGTTCTGAG  
AGGAAGGCCCCCCCCACACTGGTACTGAGACACGGACCAGACTCCTACGGGAGGCAGCAGT  
GAGGAATATTGGTCAATGGCCGGAAGGCTGAACCAGCCAAGCCGCGTGAAGGAGGAAGGT  
ACAGAGTATCGTAAACCTCTTTTGTCAAGGAAACAAAGGCGGGGACGTGTCCCCGGATGAG  
TGTACCTGAAGAAAAGCATCGGCTAACTCCGTGCCAGCAGCCGCGGTAAT

>Consensus228 len=512 tot-seq=19

AGAGTTTGGATCATGGCTCAGGATGAACGCTGGCGGCGTGCTTAACACATGCAAGTCGAAC  
GGAGCACCTTGAATGAGGATTCGTCCAAAGGATAGGAATGCTTAGTGGCGGACGGGTGA  
GTAACGCGTGAGGAACCTGCCTTGGAGTGGGGAATAACAGTTAGAAATAGCTGCTAATAC  
CGCATAATGCAACTAAGTCGCATGGCTTTGGTTGCCAAAGATTTATCGCTCTGAGATGGC  
CTCGCGTCTGATTAGATAGTTGGCGGGGTAACGGCCACCAAGTCGACGATCAGTAGCCG  
GACTGAGAGGTTGGCCGGCCACATTGGGACTGAGACACGGCCCAGACTCCTACGGGAGGC  
AGCAGTGGGGAATATTGGGCAATGGGCGCAAGCCTGACCCAGCAACGCCGCGTGAAGGAA  
GAAGGCCCTCGGGTTGTAAACTTCTTTTAAACAGGGACGAAGAAAGTGACGGTACCTGTTG  
AATAAGCCACGGCTAACTACGTGCCAGCAGCC

>Consensus229 len=515 tot-seq=19

AGAGTTTGGATCCTGGCTCAGGATGAACGCTAGCGACAGGCTTAACACATGCAAGTCGAGG  
GGCAGCGGGTAGATGAGCTTGCTCATTATGCCGGCGACCGGCGCACGGGTGAGTAACAC  
GTATGCAACCTGCCCCGTCTCAGGGGGATAATCGTCCGAAAACGGCGTCTAATACCCCGTAT  
GAAGCTGGACGGCATCGTCTGGTTTTGAAAGAATATCGGAGACGGATGGGCATGCGGCGC  
ATTAGCTGGTTGGCGGGGTAACGGCCCACCAAGGCGACGATGCGTAGGGGTTCTGAGAGG  
AAGGTCCCCCACACTGGTACTGAGACACGGACCAGACTCCTACGGGAGGCAGCAGTGAGG  
AATATTGGTCAATGGGCGAGAGCCTGAACCAGCCAAGTCGCGTGAGGGAAAGACGGTCTTA  
TGGATTGTAAACCTCTTTTGTGCGGGGAGCAAAGAGCGTACAGTGTGGCGCGTTCGAGAGTA  
CCCGAAGAAAAGCATCGGCTAACTCCGTGCCAGC

>Consensus230 len=512 tot-seq=19

AGAGTTTGGATCATGGCTCAGGATGAACGCTAGCGACAGGCTTAACACATGCAAGTCGAGG  
GGCAGCGGGGTAGTGCTTGCACTACTGCCGGCGACCGGCGCACGGGTGAGTAACACGTAT  
GGAACCTGCCCCGACGAGGGGGATAAGCGGAAGAAATTCGCTCTAATACCGCGTAAACAAC  
GTTGGGAGGCATCTCCCGATGTTTTAAAGATTTATCGGCTGCGGATGGCCATGCGGCGCAT  
TAGCTAGTCCGGCGGGGTAACGGCCCACCGAGGCGACGATGCGTAGGGGTTCTGAGAGGAA  
GGTCCCCCACACTGGTACTGAGACACGGACCAGACTCCTACGGGAGGCAGCAGTGAGGAA  
TATTGGTCAATGGGCGGAGCCTGAACCAGCCAAGTCGCGTGAGGGATGAAGGTCTTATG  
GATTGTAAACCTCTTTTGTGCGGGGAGCAAAGGCGCCACGTGTGGCGGTTTTGAGAGTACCC  
GAAGAAAAGCATCGGCTAACTCCGTGCCAGC

>Consensus231 len=481 tot-seq=19

AGAGTTTGGATCATGGCTCAGGATGAACGCTGGCGGCGTGCTTAACACATGCAAGTCGAAC  
GAAGCGATCAGGAGGAAATTTTCGGATGGAATCCGGATGACTGAGTGGCGGACGGGTGA  
GTAACGCGTGGGTAACCTGCCTCATAACAGGGGGATAACAGTTAGAAATGACTGCTAATAC

CGCATAAGCGCACGGGGATGCATATTCTTGTGTGAAAACTCCGGTGGTATGAGATGGAC  
CCGCGTCTGATTAGCTAGTTGGTGAGGTAACGGCTCACCAAGGCGACGATCAGTAGCCGA  
CCTGAGAGGGTGACCGGCACATTGGGACTGAGACACGGCCAAACTCCTACGGGAGGCAG  
CAGTGGGGAATATTGCACAATGGGGGAAACCCTGATGCAGCAACGCCGCGTGAGTGAAGA  
AGTATTTCCGGTATGTAAAGCTCTATCAGCAGGGAAGAAGATGACGGTACCTGAGTAAGAA  
G

>Consensus232 len=530 tot-seq=19

AGAGTTTGATCATGGCTCAGGATGAACGCTAGCGACAGGCTTAACACATGCAAGTCGAGG  
GGCAGCGGGGTAGTAAGCTTGCTTACTACTGCCGGCGACCGGCGCACGGGTGAGTAACAC  
GTATGCAACCTGGCCGTCACAGAGGGATAACCGGGAGAAAATCCCGCCTAATACCGCATAA  
TACCGGGGAAGGACATCCTTTCCCGGTCAAAGGAGCGATCCGGTGACGAATGGGCATGCG  
CCGCATTAGTTAGTTGGCGGTGTAACGGACCACCAAGACGACGATGCGTAGGGGTTCCTGA  
GAGGAAGGTCCCCACACTGGTACTGAGACACGGACCAGACTCCTACGGGAGGCAGCAGT  
GAGGAATATTGGTCAATGGGCGGGAGACTGAACCAGCCAAGCCGCGTGAGGGAGGAAGGT  
ACAGAGTATCGTAAACCTCTTTTGTTCAGGGAACAAAGGCGGGGACGTGTCCCCGGATGAG  
TGTACCTGAAGAAAAAGCATCGGCTAACTCCGTGCCAGCAGCCGCGGTAA

>Consensus233 len=503 tot-seq=18

AGAGTTTGATCATGGCTCAGGATGAACGCTGGCGGCGTGCTTAACACATGCAAGTCGAAC  
GAGAATCAGTGGATCAAGGATTCGTCTGAGTGAAGCTGAGGAAAGTGGCGGACGGGTGAG  
TAACGCGTGAGCAATCTGCCTTGGAGTGGGGAATAACGGCTGGAAACAGCCGCTAATACC  
GCATGACGCGTCTGGGAGGCATCTCTCTGGACGCCAAAGATTTATCGCTCTGAGATGAGC  
TCGCGTCTGATTAGCTAGTTGGCGGGTAACGGCCCACCAAGGCGACGATCAGTAGCCGG  
ACTGAGAGGTTGGCCGCCACATTGGGACTGAGACACGGCCCAGACTCCTACGGGAGGCA  
GCAGTGGGGAATATTGGCAATGGGCGCAAGCCTGACCCAGCAACGCCGCGTGAAGGAAG  
AAGGCTTTCCGGTTGTAAACTTCTTTTCTGGGGGACGAACAAATGACGGTACCCCAGGAA  
TAAGCCACGGCTAACTACGTGCC

>Consensus234 len=530 tot-seq=18

AGAGTTTGATCCTGGCTCAGGATGAACGCTAGCTACAGGCTTAACACATGCAAGTCGAGG  
GGCAGCATGGCCTATCTTTCCGGATGGGCCGATGGCGACCGGCGCACGGGTGAGTAACGC  
GTATCCAACCTTCCCTTTACTGGGGTCCAGCCCGTCGAAAGGCGGATTAATCCCCCATGT  
TCTCCGTCCCGGACATCTGTGTCCGAGCAAAGATTTATCGGTAAAGGATGGGGATGCGTC  
CGATTAGCTTGTGGCGGGTAACGGCCCACCAAGGCATCGATCCGGTAGGGGTTCCTGAGA  
GGAAGGTCCCCCACACTGGAACCTGAGACACGGTCCAGACTCCTACGGGAGGCAGCAGTG  
AGGAATATTGGTCAATGGCCGTAAGGCTGAACCAGCCAAGTAGCCTGAGGGAAGACGGCC  
CTATGGGTTGTAAACCTCTTTTGGCCGGGAGCAAAGAGCGGCACGTGTGCCGCTCGAGA  
GTACCCGGAGAAAAAGCATCGGCTAACTCCGTGCCAGCAGCCGCGGTAA

>Consensus235 len=519 tot-seq=18

AGAGTTTGATCCTGGCTCAGGATGAACGCTAGCGACAGGCTTAACACATGCAAGTCGAGG  
GGCAGCGGTGGTGAAGGCTTGCTTTTACCAGCCGGCGACCGGCGCACGGGTGAGTAACAC  
GTATGCAACCTGCCTGCCACAGCCGATAATCGGGAGAAAATCCCGTCTAATACGGCATAA  
TGCATCGACGGGACATCCTGTGGTGCCAAAGGTTGATTCGGTGGCGGATGGGCATGCG  
TCGCATTAGTTAGTTGGCGGTGTAACGGACCACCAAGACGACGATGCGTAGGGGTTCCTGA  
GAGGAAGGTCCCCCACACTGGTACTGAGACACGGACCAGACTCCTACGGGAGGCAGCAGT  
GAGGAATATTGGTCAATGGTCGGGAGACTGAACCAGCCAAGCCGCGTGAGGGAGGAAGGT  
ACAGAGTATCGTAAACCTCTTTTGTTCAGGGAACAAAGGCGGGGACGTGTCCCCGGATGAG  
TGTACCTGAAGAAAAAGCATCGGCTAACTCCGTGCCAGC

>Consensus236 len=520 tot-seq=17

AGAGTTTGATCCTGGCTCAGGATGAACGCTAGCGACAGGCTTAACACATGCAAGTCGAGG  
GGCAGCGGAGGCGAGAGCTTGCTCTCGCCTGCCGGCGACCGGCGCACGGGTGAGTAACAC  
GTATGCAACCTGCCCCCTGCAGGAGGATAACCGGGAGAAAATCCCGACTAATACTGCATAA  
CACCCTGGGGCCACATGGCTTCGGGGTCAAAGGAAGCAATTCGGCAGGGGATGGGCATG  
CGGCGCATTAGCCAGTTGGCGGGTAACGGCCCACCAAGGCGACGATGCGTAGGGGTTCCT  
GAGAGGAAGGTCCCCCACACTGGTACTGAGACACGGACCAGACTCCTACGGGAGGCAGCA  
GTGAGGAATATTGGTCAATGGTCGGGAGACTGAACCAGCCAAGCCGCGTGAGGGAGGAAG

GTACAGAGTATCGTAAACCTCTTTTGTTCAGGGAACAAAGGCGGGGACGTGTCCCCGGATG  
AGTGTACCTGAAGAAAAGCATCGGCTAACTCCGTGCCAGC

>Consensus237 len=508 tot-seq=16

AGAGTTTGCATCATGGCTCAGGATGAACGCTGGCGGCGTGCCTAATACATGCAAGTCGAAC  
GCATCTAGCAATAGATGAGTGGCGAACGGGTGAGTAAGACATAAGCAACCTAGCCTTTTG  
AGGGGGATAACTGCTGGAAACGGCAGCTAAGACCGCATAGGCATATTGATCGCATGAGAG  
ATATGTTAAATATCCTACGGGATAGCGAGGGGATGGGCTTATGACGCATTAGCTAGTTGG  
AGGGGTAACGGCCACCAAGGCGACGATGCGTAGCCGGCTGAGAGGGTGGACGGCCACA  
CTGGGACTGAGACACGGCCAGACTCCTACGGGAGGCAGCAGTAGGGAATTTTCGGCAAT  
GGACGAAAGTCTGACCGAGCAACGCCGCGTGAGGGAGGAAGTACTTCGGTATGTAAACCT  
CTGTTATAAAGGAAGAACGGTATAATCAGGGAATGGGTATAAGTGACGGTACTTTATGA  
GGAAGCCACGGCTAACTACGTGCCAGCC

>Consensus238 len=507 tot-seq=16

AGAGTTTGCATCCTGGCTCAGGATGAACGCTGGCGGCGTGCCTAACACATGCAAGTCGAAC  
GGGGTGCCTTTGAAAGAGGATTCGTCCAATTGAGAAGGTTACCTAGTGGCGGACGGGTGA  
GTAACGCGTGAGTAACCTGCCTTGGAGTGGGGAATAACACATCGAAAGATGTGCTAATAC  
CGCATAATGCAGTTGGGCCGCATGGCTCTGACTGCCAAAGATTTATCGCTCTGAGATGGA  
CTCGCGTCTGATTAGCTGGTTGGCGGGGTAACGGCCACCAAGGCGACGATCAGTAGCCG  
GACTGAGAGGTTGACCGGCCACATTGGGACTGAGACACGGCCAGACTCCTACGGGAGGC  
AGCAGTGGGGAATATTGGGCAATGGGCGCAAGCCTGACCCAGCAACGCCGCGTGAAGGAA  
GAAGGCTTCCGGGTGTAAACTTCTTTTATCAGGGACGAAGCAAGTGACGGTACCTGATGA  
ATAAGCCACGGCTAACTACGTGCCAGC

>Consensus239 len=518 tot-seq=15

AGAGTTTGCATCATGGCTCAGGATGAACGCTGGCGGCGTGCCTAACACATGCAAGTCGAGC  
GAAGCACTTGAATTCGATTCTTCGGATGAAGATTTTTGTGACTGAGCGGCGGACGGGTGA  
GTAACGCGTGGGCAACCTGCCTTACACGGGGGGATAACAGTTAGAAATGACTGCTAATAC  
CGCATAAGACCACGGTACTGCATGGTACAGTGGTAAAAACTCCGGTGGTGTAAAGATGGAC  
CCGCGTCTGATTAGCTTGTGGCGGGGTAACGGCCACCAAGGCGACGATCAGTAGCCGG  
CCTGAGAGGGTGGACGGCCACATTGGGACTGAGACACGGCCCAAACCTCCTACGGGAGGCA  
GCAGTGGGGGATATTGGACAATGGGGGAAACCCTGATCCAGCGACGCCGCGTGAGTGAAG  
AAGTATTTCCGGTATGTAAAGCTCTGTTCAGCAGGGAAGAAAGAAATGACGGTACCTGACCA  
AGAAGCCCCGGCTAACTACGTGCCAGCAGCCGCGGTAA

>Consensus240 len=499 tot-seq=15

AGAGTTTGCATCCTGGCTCAGGATGAACGCTGGCGGCGTGCCTAACACATGCAAGTCGAAC  
GGGGTACCCCAAAGGAGTTTTTCGGACAACCTGCGGGGAATACCTAGTGGCGGACGGGTGA  
GTAACGCGTGAGTAACCTGCCTTGGAGTGGGGAATAACAGCTGGAAACAGCTGCTAATAC  
CGCATGATGCAGTTGAGTCGCATGGCTCTGACTGCCAAAGATTTATCGCTCTGAGATGGA  
CTCGCGTCTGATTAGCTGGTTGGCGGGGCAACGGCCACCAAGGCGACGATCAGTAGCCG  
GACTGAGAGGTTGGCCGGCCACATTGGGACTGAGACACGGCCAGACTCCTACGGGAGGC  
AGCAGTGGGGAATATTGGGCAATGGGCGCAAGCCTGACCCAGCAACGCCGCGTGAGTGAAG  
GAAGGCTTTCGGGTGTAAACCGTCTTTTACCCAGGGACGAAGCAAGTGACGGTACCTG  
AGGAATAAGCCACGGCTAA

>Consensus241 len=507 tot-seq=15

AGAGTTTGCATCCTGGCTCAGGATGAACGCTGGCGGCGTGCCTAACACATGCAAGTCGAAC  
GAAGCGCCTGCTTTGAATTCCTTCGGGAAGGAAAAGTTTGGCGACTGAGTGGCGGACGGGT  
GAGTAACGCGTGGGCAACCTGCCCGCACTGGGGGACAACAGCTGGAAACGGCTGCTAAT  
ACCGCATAAGCGCACAGCTTCGCATGAAGCAGTGTGAAAAACTCCGGTGGTGCGGGATGG  
ACCCGCGTCTGATTAGCTGGTTGGCGGGGTAACGGCCACCAAGGCGACGATCAGTAGCC  
GGCCTGAGAGGGTGGACGGCCACATTGGGACTGAGACACGGCCAGACTCCTACGGGAGG  
CAGCAGTGGGGAATATTGCACAATGGGGGAAACCCTGATGCAGCGACGCCGCGTGAGCGA  
AGAAGTATTTCCGGTATGTAAAGCTCTATCAGCAGGAAAGAAAATGACGGTACCTGACTAA  
GAAGCTCCGGCTAAATACGTGCCAGCA

>Consensus242 len=515 tot-seq=14

AGAGTTTGCATCCTGGCTCAGGATGAACGCTGGCGGCGTGCCTAACACATGCAAGTCGAAC

GGGACGCCTATGACGGAGTTTTTCGGACAACGGATTAGGCTGTTTAGTGGCGGACGGGTGA  
GTAACGCGTGAGGAACCTGCCTTGGAGTGGGAATAACACGGCGAAAGTCGTGCTAATAC  
CGCATAATGCAGTTGGGCCGCATGGCTCTGGCTGCCAAAGATTTATCGCTCTGAGATGGA  
CTCGCGTCTGATTAGCTAGTTGGCGGGGTAACAGCCACCAAGGCGACGATCAGTAGCCG  
GACTGAGAGGTTGACCGGCCACATTGGGACTGAGACACGGCCAGACTCCTACGGGAGGC  
AGCAGTGGGGAATATTGGGCAATGGGCGCAAGCCTGACCCAGCAACGCCGCGTGAAGGAA  
GAAGGCTTTTCGGGTTGTAAACTTCTTTTATTTCGGGTACGAAGCAAGTGACGGTACCGAAT  
GAATAAGCCACGGCTAACTACGTGCCAGCAGCCGC

>Consensus243 len=527 tot-seq=13

AGAGTTTGATCCTGGCTCAGGATGAACGCTAGCGGCAGGCTTAACACATGCAAGTCGAAG  
GGCAACGGGGAGAGTGCTTGCACCTCTGCGGGCGACTGGCGCACGGGTGAGTAACACGT  
ATGCAACCTGCCCTCCACAGGGGACAACCTTCCGAAAGGAGGCTAATCCCGCGTATAT  
CCCTTGGGGGCATCCTTGGGGGAGGAAAGGATTACCGGTGGAGGATGGGCATGCGGGCGCA  
TTAGGCAGTAGGCGGGGTAACGGCCCACCTAACCGACGATGCGTAGGGGTTCTGAGAGGA  
AGGTCCCCCACACTGGTACTGAGACACGGACCAGACTCCTACGGGAGGCAGCAGTGAGG  
AATATTGGTCAATGGGCGAAGCCTGAACCAGCCAAGCCGCGTGAAGGACGAAGGTGCCA  
AGCATTGTAAACTTCTTTTGTCAAGGGACAAAATCAGGCTCGAGAGCCTGACCGAGGGTA  
CTTGAAGAAAAGCATCGGCTAACTCCGTGCCAGCAGCCGCGGTAAT

>Consensus244 len=517 tot-seq=12

AGAGTTTGATCATGGCTCAGGACAAACGCTGGCGGCGTGCCTAACACATGCAAGTCGAAC  
GAAGCACTGGAGAAAGAGACTTCGGTCAATGACTCCTTTGACTTAGTGGCGGACGGGTGA  
GTAATGCGTGAGCAACCTGCCTTGGAGGGGGGACAACAGCTGGAAACGGCTGCTAATAC  
CGCATGAAGTTACTGGGGGCATCCTTTGGTAACCAAAGATTTATCGCTCTGAGATGGGCT  
CACGTCTGATTAGTTAGTTGGTAGGGTAACGGCCTACCAAGACCGCGATCAGTAGCCGGA  
CTGAGAGGTTGAACGGCCACATTGGGACTGAGATACGGCCAGACTCCTACGGGAGGCAG  
CAGTGGGGAATATTGGGCAATGGGCGCAAGCCTGACCCAGCAACGCCGCGTGAAGGAAGA  
AGGCTTTTCGGGTTGTAAACTTCTTTTACCAGGGACGAAGAAAGTGACGGTACCTGGAGAA  
TAAGCCACGGCTAACTACGTGCCAGCAGCCGCGGTAA

>Consensus245 len=524 tot-seq=12

AGAGTTTGATCCTGGCTCAGGATGAACGCTAGCGACAGGCTTAACACATGCAAGTCGAGG  
GGCAGCGGGGAGCAAGCTTGCTTGCCTGCTGCGGGCGACCGGCGCACGGGTGAGTAACACGT  
ATGCAACCTGCCCTCCGACAGGGGATAACCCGGAGAAAATCCGGACTAATACCGCGTGGTA  
CATCTGTGGGGCATCCCACGGGTGTTAAAAGGAAGCGATTCCGGCGGAGGATGGGCATGC  
GGCGCATTAGCTAGTTGGCGGGGTAACGGCCCACCAAGGCGACGATGCGTAGGGGTTCTG  
AGAGGAAGGTCCCCCACACTGGTACTGAGACACGGACCAGACTCCTACGGGAGGCAGCAG  
TGAGGAATATTGGTCAATGGGCGGGAGCCTGAACCAGCCAAGTCGCGTGAGGGAAGACGG  
TCCTATGGATTGTAAACCTCTTTTGTTCGGGGAGCAAAAAGGCGCCACGTGTGCGGCTTCGA  
GAGTACCCGAAGAAAAAGCATCGGCTAACTCCGTGCCAGCAGCC

>Consensus246 len=528 tot-seq=11

AGAGTTTGATCATGGCTCAGGATGAACGCTAGCGACAGGCTTAACACATGCAAGTCGAGG  
GGCAGCGGGGAGTAGCAATACTCCCGCCGGCGACCGGCGCACGGGTGAGTAACACGTAT  
GAAACCTGCCCGTAGCAGGGGGATAAGCGGAAGAAAATCCGTCTAATACCGCGTAAACAAC  
CCGAGGAGGCATCTCCTCGGGTTTAAAGGAGGCGATTCCGGCTACGGATGGTCATGCGTC  
GCATTAGCTAGTTGGCGGGGTAACGGCCCACCAAGGCGACGATGCGTAGGGGTTCTGAGA  
GGAAGGTCCCCCACACTGGTACTGAGACACGGACCAGACTCCTACGGGAGGCAGCAGTG  
AGGAATATTGGTCAATGGCCGCAGGGCTGAACCAGCCAAGTCGCGTGAGGGATGACGGTC  
CTATGGATTGTAAACCTCTTTTGTTCAGGGAGCAAAAAGGCGCCACGTGTGGTGTTTTCGAG  
AGTACCTGAAGAAAAAGCATCGGCTAACTCCGTGCCAGCAGCCGCGGT

>Consensus247 len=457 tot-seq=10

AGAGTTTGATCATGGCTCAGGATGAACGCTGGCGGCGTGCCTAACACATGCAAGTCGAGC  
GAAGCACTTCACTTTGATCTTTTCGGGAGGAGGAGAGGAGTGACTGAGCGGCGGACGGGT  
GAGTAACGCGTGGGTAACCTGCCTCATAAGGGGGATAACAGTTAGAAATGACTGCTAAT  
ACCGCATAAGCGCACGGGACCGCATGGTCCGGTGTGAAAACTCCGGTGGTATGAGATGG  
ACCCGCGTCTGATTAGTTAGTTGGCGGGGTAACGGCCCACCAAGGCGACGATCAGTAGCC

GGCCTGAGAGGGTGAACGGCCACATTGGGACTGAGACACGGGCCCAAACCTCCTACGGGAG  
GCAGCAGTGGGGAATATTGCACAATGGGGGAAACCCTGATGCAGCGACGCCGCGTGAGCG  
ATGAAGTATTTTCGGTTTGTAAAGCTCTATCAGCAGGG

>Consensus248 len=513 tot-seq=9

AGAGTTTGATCATGGCTCAGGATGAACGCTGGCGGCATGCCTAATACATGCAAGTCGAAC  
GAGGATCCTTCGGGATCCTAGTGGCGAACGGGTGAGTAACACGTAGGGAACCTGCCCCGG  
CACCGGAATACGCTCTGAAACGGGAGAACAAATCCCGATGTACAGGAAGGAGGCATCTT  
CTTTCTGTGAAACATCCTGTAAGGGATGGGGCGCGGATGGACCTGCGGTGCATTAGTTGG  
TTGGCGAGGGTAAAGGCCACCAAGACGATGATGCATAGCCGGCCTGAGAGGGCGGACGG  
CCACATTGGGACTGAGACACGGCCAGACTCCTGCGGGAGGCAGCAGTAGGGAATTTTGG  
TCAATGGGCGCAAGCCTGAACGAGCGATGCCGCGTGAGGGAAGAAGGCCTTCGGATCGTA  
AAGCTCTGTTGTCGGGGAAAAAGAGCGGAGAGAGGAAATGGTCTCTGATTGATATTACCC  
TTCGAGGAAGTCACGGCTAACTACGTGCCAGCA

>Consensus249 len=524 tot-seq=9

AGAGTTTGATCATGGCTCAGGATGAACGCTAGCGACAGGCTTAACACATGCAAGTCGAGG  
GGCAGCGGGTAGATGAGCTTGCTCATTATGCCGGCGACCGGCGCACGGGTGAGTAACAC  
GTATGCAACCTGCCCCGTCTCAGGGGATAATCGTCCGAAACGGCGTCTAATACCCCGTAT  
GAAGCTGGACGGCATCGTCTGGTTTTGAAAGAATACCGGAGACGGATGGGCATGCGGCGC  
ATTAGCTAGTTGGCGGGGTAACGGCCACCAAGGCGACGATGCGTAGGGGTTCTGAGAGG  
AAGGTCCCCCACACTGGTACTGAGACACGGACCAGACTCCTACGGGAGGCAGCAGTGAGG  
AATATTGGTCAATGGGCGGGAGCCTGAACCAGCCAAGTCGCGTGAGGGAGGAAGGTCCCTA  
AGGATTGTAACCTCTTTTGTGTCAGGGAACAAAGGCGGGGACGTGTGCCCGGACGAGAGTA  
CCTGAAGAAAAAGCATCGGCTAACTCCGTGCCAGCCCCACCC

>Consensus250 len=533 tot-seq=9

AGAGTTTGATCATGGCTCAGGATGAACGCTAGCGGCAGGCTTAACACATGCAAGTCGAGG  
GGCAGCGGGGAGGAAGCTTGCTTTCTCCGCCGGCGACCGGCGCACGGGTGAGTAACACGT  
ATGCAACCTGCCCCGTCTCAGGGGACAACCCGCCGAAAGGCGGGCTAAACCCCGGTACAT  
GCCACCGGGGCATCCCGGAGGCAGGAAAGGCTTCGGCCGGACAGGGATGGGCATGCGGCG  
CATTAGGCAGTAGGCGGGGTAACGGCCACCTAACCGACGATGCGTAGGGGTTCTGAGAG  
GAAGGTCCCCCACACTGGTACTGAGACACGGACCAGACTCCTACGGGAGGGCAGCAGTG  
AGGAATATTGGTCAATGGGCGGGAGGCTGAACCAGCCAAGCCGCGTGAGGGAGGAAGGGA  
CTGAGGATTGTAACCTCTTTTGTGTCGGGGAGCAAAAGGCGGGGCGTGTGCCCGCGGATGA  
GTGTACCTGAAGAAAAAAGATCGGCTAACCCCGTGCCAGCAGCCGCGGTAAT

>Consensus251 len=517 tot-seq=7

AGAGTTTGATCATGGCTCAGGATGAACGCTAGCGACAGGCTTAACACATGCAAGTCGAGG  
GGCAGCGGTGGTGAAGGCTTGCTTTTACCAGCCGGCGACCGGCGCACGGGTGAGTAACAC  
GTATGCAACCTGCCTGCCACAGCCGATAATCGGGAGAAATTCGGTCTAATACGGCATAA  
TGCATCGACGGGACATCCTGTTGGTGCCAAAGGTTAATTCGGGTGGCGGATGGGCATGCG  
TCGATTAGTTAGTTGGCGGTGTAACGGACCACCAAGACGACGATGCGTAGGGGTTCTGA  
GAGGAAGGTCCCCCACACTGGTACTGAGACACGGACCAGACTCCTACGGGAGGCAGCAGT  
GAGGAATATTGGTCAATGGGCGGGAGCCTGAACCAGCCAAGTCGCGTGAGGGAAAGACGGC  
CCTATGGATTGTAACCTCTTTTGTGTCGGGGAGCAAAAGTGCCGGCACGTGTGCCGTTTGGAG  
AGTACCCGAAGAAAAAGCATCGGCTAACTCCGTGCCA

>Consensus252 len=506 tot-seq=7

AGAGTTTGATCATGGCTCAGGATGAACGCTGGCGGCGTGCTTAACACATGCAAGTCGAAC  
GAAGCAAGAAGCGAAGCGCAAGCAGAGGTTCTTGACTGAGTGGCGGACGGGTGAGTAACG  
CGTGGATAACCTGCCTTTCACAGGGGGATAACAGCCGAAACGGCTGCTAAAACCGCATA  
AGCGCACAAAGGGCCGCATGGCCTGGTGTGAAAAACTCCGGTGGTATGGGATGGGCCCCGG  
TCTGATTAGCTAGTTGGCGGGTAAACGGCCACCAAGGCGACGATCAGTAGCCGGCCTGA  
GAGGTGGACGGCCACATGAGGACTGAGACACGGCCAAACTCCTACGGGAGGCAGCAGT  
GGGGAATATTGCACAATGGGGGAAACCCTGATGCAGCGACGCCGCGTGAGCGAAGAAGTA  
TTTCGGTATGTAAAGCTCTATCAGCAGGGAAGAAAAATGACGGTACCTGAGTAAGAAGCA  
CCGGCTAAATACGTGCCAGCAGCCG

>Consensus253 len=530 tot-seq=7

AGAGTTTGATCCTGGCTCAGGATGAACGCTAGCGACAGGCTTAACACATGCAAGTCGAGG  
GGCAGCGGGGGGACTGGTTCGCCAGTGCCTGCCGGCGACCGGCGCACGGGTGAGTAACAC  
GTATGCAACCTGGCCTCCGCAGGGGGATAACCGGTGGAAACACCGCCTAATACCCCGCGA  
CGCCACGGAGGGGCATCCTCCGTGGCCAAAGGAGCGATCCGGCGGAGGATGGGCATGCG  
GCGCATTAGCTGGTCGGCGGGGTGACGGCCACCGAGGCGACGATGCGTAGGGGTCTGA  
GAGGAAGGCCCCCACACTGGGACTGAGACACGGCCAGACTCCTACGGGAGGCAGCAGT  
GAGGAATATTGGTCAATGGGCGGGAGCCTGAACCAGCCAAGTCGCGTGAGGGAGGAAGGC  
CCTACGGGTCGTAAACCTCTTTTGGCGGGGAGCAGTGCCAGCTCGTGAGCTGGGAGGAG  
CGTACCCGGAGAAAAAGCATCGGCTAACTCCGTGCCAGCAGCCGCGGTAA

>Consensus254 len=503 tot-seq=6

AGAGTTTGATCCTGGCTCAGGATGAACGCTGGCGGCGTGCTTAACACATGCAAGTCGAAC  
GAAGCACTGAAAGCAGATTACTTCGGTTTGAAGCTTTCTTTGACTGAGTGGCGGACGGGT  
GAGTAACGCGTGGGTAACCTGCCTCATAAGGGGGATAACAGTTAGAAATGACTGCTAAT  
ACCGCATAAGCGCACGGTTTCGCATGGAGCAGTGTGAAAAACTCCGGTGGTATAGGATGG  
ACCCGCGTCTGATTAGCTAGTTGGCGGGGTAACGGCCACCAAGGCGACGATCAGTAGCC  
GGCCTGAGAGGGTGGACGGCCACATTGGGACTGAGACACGGCCAAACTCCTACGGGAGG  
CAGCAGTGGGGAATATTGCACAATGGGGGAAACCCTGATGCAGCGACGCCGCGTGAAGGA  
AGAAGTATTTTCGGTATGTAACTTCTATCAGCAGGGAAGAAAATGGGGGGGCGCTGACTAA  
GAAGCCCCGGCTAACTACGTGCC

>Consensus255 len=505 tot-seq=5

AGAGTTTGATCCTGGCTCAGGATGAACGCTGGCGGCGTGCTTAACACATGCAAGTCGAAC  
GGGCTCATATTGAAACCTAGTGATGTATGAGTTAGTGGCGGACGGGTGAGTAACGCGTGG  
AGAACCTGCCGTATACTGGGGGATAACACTTAGAAATAGGTGCTAATACCGCATAAGCGC  
ACAGCTTCGCATGAAGCAGTGTGAAAAACTCCGGTGGTATAGGATGGACCCGCGTCTGAT  
TAGCTAGTTGGCGGGGTAACGGCCACCAAGGCGACGATCAGTAGCCGGCCTGAGAGGGT  
GGACGGCCACATTGGGACTGAGACACGGCCAAACTCCTACGGGAGGCAGCAGTGGGGAA  
TATTGCACAATGGGGGAAACCCTGATGCAGCGACGCCGCGTGAGTGAAGAAGGTTTTCGG  
ATTGTAACTCCTGTTGTTAGAGAAGAAAATGACGGTAGCTAACGAATAAGCACCCGGCT  
AACTCCGTGCCAGCAGCCGCGGTAA

>Consensus256 len=516 tot-seq=5

AGAGTTTGATCCTGGCTCAGGATGAACGCTGGCGGCGTGCTTAACACATGCAAGTCGAAC  
GGGAATGCCACGCTGATGCGATTTTCGGTCAAATCATGTGGCATTTCGAGTGGCGGACGGGT  
GAGTAACGCGTGGGTAACCTGCCTTACACAGGGGGATAACACCTGGAAACAGGTGCTAAT  
ACCGCATAAGCGCACAGGGCCGCATGGCCAGTGTGAAAAACTCCGGTGGTGTAAAGATGG  
ACCCGCGTCTGATTAGCTAGTTGGCGGGGTAACGGCCACCAAGGCGACGATCAGTAGCC  
GGCCTGAGAGGGTGGACGGCCACATTGGGACTGAGACACGGCCAAACTCCTACGGGAGG  
CAGCAGTGGGGGATATTGGACAATGGGGGAAACCCTGATCCAGCGACGCCGCGTGAGCGA  
GGAAGTACCTCGGTATGTAAAGCTCTGTGAGCAGGGAAGAAACAGGACAGTACCTGACTA  
AGAAGCCCCGGCTAACTACGTGCCAGCAGCCGCGGT

>Consensus257 len=529 tot-seq=5

AGAGTTTGATCATGGCTCAGGATGAACGCTAGCGACAGGCTTAACACATGCAAGTCGAGG  
GGCAGCGGGGGAGTAGCAATACTTCCGCCGGCGACCGGCGCACGGGTGAGTAACACGTAT  
GAAACCTGCCCGTAGCAGGGGGATAAGCGGAAGAAATTCGGTCTAATACCGCGTAAACAAC  
CCGAGGGGGCATCTCTTCGGGTTTAAAGGAGGCGATTCCGGCTACGGATGGTCATGCGTC  
GCATTAGCTAGTTGGCGGGGTAACGGCCACCAAGGCGACGATGCGTAGGGGTCTTGAGA  
GGAAGGTCCCCCACACTGGTACTGAGACACGGACCAGACTCCTACGGGAGGCAGCAGTG  
AGGAATATTGGTCAATGGCCGCGAGGCTGAACCAGCCAAGTCGCGTGAGGGATGACGGTTC  
CTATGGGTTGTAAACCTCTTTTGTTCGGGGAGCAAAAGCGGCCCGTGTGGCGGTTGGAGAG  
TACCCGAAGAAAAAGCATCGGCTAACTCCGTGCCAGCAGCCGCGGTAA
