# Supplementary material for: Mouse Paneth cell antimicrobial function is independent of Nod2
Source: HighWire-hosted journal article supplement (doi:10.1136/gutjnl-2012-304190), 2013-03-19
Supplement: gutjnl-2012-304190supp_table1.pdf [file gutjnl-2012-304190supp_table1.pdf]

|                     | Mean | SD   | 95% CI    | P-value |
|---------------------|------|------|-----------|---------|
| <b>Lyz</b>          |      |      |           |         |
| WT                  | 0.94 | 0.21 | 0.78-1.10 | 0.94    |
| Nod2 <sup>-/-</sup> | 0.93 | 0.22 | 0.78-1.09 |         |
| <b>Reg3γ</b>        |      |      |           |         |
| WT                  | 0.97 | 0.42 | 0.65-1.30 | 0.74    |
| Nod2 <sup>-/-</sup> | 0.92 | 0.25 | 0.71-1.12 |         |
| <b>Ang4</b>         |      |      |           |         |
| WT                  | 1.12 | 0.43 | 0.86-1.52 | 0.49    |
| Nod2 <sup>-/-</sup> | 1.35 | 0.53 | 0.96-1.72 |         |
| <b>PanCrp</b>       |      |      |           |         |
| WT                  | 0.93 | 0.26 | 0.73-1.13 | 0.73    |
| Nod2 <sup>-/-</sup> | 0.88 | 0.30 | 0.67-1.10 |         |
| <b>CRS1C</b>        |      |      |           |         |
| WT                  | 0.96 | 0.28 | 0.74-1.18 | 0.04    |
| Nod2 <sup>-/-</sup> | 0.73 | 0.12 | 0.64-0.82 |         |
| <b>CRS4C</b>        |      |      |           |         |
| WT                  | N.D. | -    | -         | -       |
| Nod2 <sup>-/-</sup> | N.D. | -    | -         | -       |
| <b>Defa4</b>        |      |      |           |         |
| WT                  | N.D. | -    | -         | -       |
| Nod2 <sup>-/-</sup> | N.D. | -    | -         | -       |
| <b>Defa20</b>       |      |      |           |         |
| WT                  | 1.18 | 0.60 | 0.76-1.61 | 0.67    |
| Nod2 <sup>-/-</sup> | 1.07 | 0.52 | 0.67-1.47 |         |
| <b>Defa3</b>        |      |      |           |         |
| WT                  | 1.14 | 0.45 | 0.76-1.52 | 0.53    |
| Nod2 <sup>-/-</sup> | 1.30 | 0.55 | 0.84-1.77 |         |
| <b>Defa5</b>        |      |      |           |         |
| WT                  | 1.05 | 0.24 | 0.85-1.25 | 0.11    |
| Nod2 <sup>-/-</sup> | 0.89 | 0.16 | 0.77-1.01 |         |

**Supplemental Table 1.** *WT and Nod2<sup>-/-</sup> antimicrobial peptide mRNA expression levels.* This table displays the mean, standard deviation (SD), 95% confidence interval (CI), and p-value (based on Student's t-test) for all antimicrobial peptide transcript levels generated in this study (n = 8-10 mice/group for WT and *Nod2<sup>-/-</sup>* mice).
