# Supplementary material for: Mouse Paneth cell antimicrobial function is independent of Nod2
Source: HighWire-hosted journal article supplement (doi:10.1136/gutjnl-2012-304190), 2013-03-19
Supplement: gutjnl-2012-304190supp_table2.pdf [file gutjnl-2012-304190supp_table2.pdf]

| AU-PAGE Band  | Observed m/z              | Identified $\alpha$ -defensin | Theoretical m/z | Percent Identity |
|---------------|---------------------------|-------------------------------|-----------------|------------------|
| <b>rDefa4</b> |                           |                               |                 |                  |
| 1             | 3754.9551                 | Defa4                         | 3756.51         | 99.96%           |
| <b>WT</b>     |                           |                               |                 |                  |
| 2             | 4076.2622                 | vDefa24-N                     | 4079.90         | 99.91%           |
|               | 4090.9565                 | vDefa24                       | 4094.90         | 99.90%           |
|               | 4317.0957                 | Defa5                         | 4316.20         | 99.98%           |
| 3             | 4077.0854                 | vDefa24-N                     | 4079.90         | 99.93%           |
|               | 4091.0470                 | vDefa24                       | 4094.90         | 99.91%           |
|               | 4128.0332                 | Defa16                        | 4134.92         | 99.83%           |
| 4             | 2475.1162                 | Defa20*                       | 2475.34         | 99.99%           |
|               | 4232.8076                 | vDefa23                       | 4231.04         | 99.96%           |
|               | 4248.2339                 | Defa2                         | 4248.08         | 99.99%           |
| 5             | 4329.6270                 | Defa21                        | 4330.11         | 99.99%           |
|               | 4228.1084                 | vDefa23                       | 4231.04         | 99.93%           |
|               | 4244.2031                 | Defa2                         | 4248.08         | 99.91%           |
| 6             | 4347.9673                 | Defa22                        | 4344.19         | 99.91%           |
|               | 4342.5874                 | Defa22                        | 4344.19         | 99.96%           |
|               | <b>Nod2<sup>-/-</sup></b> |                               |                 |                  |
| 7             | 4075.8882                 | vDefa24-N                     | 4079.90         | 99.90%           |
|               | 4092.0063                 | vDefa24                       | 4094.90         | 99.93%           |
|               | 4313.2397                 | Defa5                         | 4316.20         | 99.93%           |
| 8             | 4076.0728                 | vDefa24-N                     | 4079.90         | 99.91%           |
|               | 4092.0823                 | vDefa24                       | 4094.90         | 99.93%           |
|               | 4133.0376                 | Defa16                        | 4134.92         | 99.95%           |
| 9             | 2483.5461                 | Defa20*                       | 2475.34         | 99.67%           |
|               | 4230.8179                 | vDefa23                       | 4231.04         | 99.99%           |
|               | 4244.3823                 | Defa2                         | 4248.08         | 99.91%           |
| 10            | 4330.0146                 | Defa21                        | 4330.11         | 99.99%           |
|               | 4229.1157                 | vDefa23                       | 4231.04         | 99.95%           |
|               | 4246.1221                 | Defa2                         | 4248.08         | 99.95%           |
| 11            | 4345.3413                 | Defa22                        | 4344.19         | 99.97%           |
|               | 4346.5649                 | Defa22                        | 4344.19         | 99.95%           |

**Supplemental Table 2.** *WT* and *Nod2<sup>-/-</sup>* mice express the same set of Paneth cell  $\alpha$ -defensins. Observed mass-to-charge (m/z) values of prominent, software-indicated mass peaks found within the expected cryptdin mass range (2499.0 to 4518.0 m/z) are tabulated in correspondence to the gel bands labeled in Fig.2E. The observed m/z values are listed in increasing value. Determination of the

cryptdin identity of individual m/z values was assisted by a comparison of the observed m/z values with the calculated m/z values of all purified and transcript- and gene-predicted cryptdin peptides based upon their oxidized, singly-protonated forms. Matches of m/z values with greater than 99.6% identity or with mass differences less than 5 Da were deemed sufficient for individual identification of mass peaks. Percent identity of m/z values was calculated from the quotient of the lesser over the greater m/z values of matched pairs. The labels vDefa23 and vDefa24 are used for various non-identical masses since there are multiple Defa23 and Defa24 variant transcripts that have yet to acquire unambiguous identifiers. Note that the identification of Defa20 was extrapolated by the presence of an m/z value that was more than 98% identical to the predicted m/z value of the doubly-protonated form of oxidized Defa20, since mass spectrometric analysis was performed outside the mass range of its predicted, singly-protonated-based m/z value (4950.69).
