# Supplementary material for: Mouse Paneth cell antimicrobial function is independent of Nod2
Source: HighWire-hosted journal article supplement (doi:10.1136/gutjnl-2012-304190), 2013-03-19
Supplement: gutjnl-2012-304190supp_table3.pdf [file gutjnl-2012-304190supp_table3.pdf]

| OTU #        | RDP Output                                                                                                                                  | WT   | Nod2 <sup>-</sup> | P-Value  | MTC  |
|--------------|---------------------------------------------------------------------------------------------------------------------------------------------|------|-------------------|----------|------|
| Consensus198 | Bacteroidetes(100);Bacteroidia(85);Bacteroidales(85);Porphyromonadaceae(78);Butyricimonas(21)                                               | 0.33 | 0.08              | 5.67E-04 | 0.12 |
| Consensus106 | Bacteroidetes(100);Bacteroidia(100);Bacteroidales(100);Porphyromonadaceae(100);Parabacteroides(100)                                         | 0.35 | 0.73              | 2.27E-03 | 0.25 |
| Consensus162 | Firmicutes(100);Clostridia(100);Clostridiales(100);Lachnospiraceae(98);Syntrophococcus(12)                                                  | 0.10 | 0.42              | 3.88E-02 | 2.83 |
| Consensus31  | Bacteroidetes(100);Bacteroidia(100);Bacteroidales(100);Prevotellaceae(100);Prevotella(58)                                                   | 1.31 | 1.09              | 4.32E-02 | 2.37 |
| Consensus45  | Bacteroidetes(100);Bacteroidia(86);Bacteroidales(86);Porphyromonadaceae(84);Paludibacter(28)                                                | 0.01 | 0.51              | 4.47E-02 | 1.96 |
| Consensus163 | Firmicutes(100);Clostridia(100);Clostridiales(100);Ruminococcaceae(100);Pseudoflavonifractor(6)                                             | 0.24 | 0.47              | 0.06     | 2.03 |
| Consensus129 | Firmicutes(100);Clostridia(100);Clostridiales(100);Ruminococcaceae(100);Pseudoflavonifractor(68)                                            | 0.30 | 0.54              | 0.07     | 2.05 |
| Consensus155 | Firmicutes(100);Clostridia(100);Clostridiales(100);Lachnospiraceae(100);Lachnospiracea_incertae_sedis(24)                                   | 0.14 | 0.41              | 0.07     | 2.00 |
| Consensus200 | TM7(100);TM7_genera_incertae_sedis(100)                                                                                                     | 0.29 | 0.14              | 0.08     | 1.85 |
| Consensus187 | Firmicutes(83);Clostridia(83);Clostridiales(83);Ruminococcaceae(53);Papillibacter(15)                                                       | 0.00 | 0.20              | 0.08     | 1.72 |
| Consensus189 | Firmicutes(100);Clostridia(100);Clostridiales(100);Ruminococcaceae(100);Flavonifractor(71)                                                  | 0.11 | 0.32              | 0.08     | 1.56 |
| Consensus53  | Bacteroidetes(100);Bacteroidia(94);Bacteroidales(94);Prevotellaceae(92);Paraprevotella(44)                                                  | 0.00 | 0.40              | 0.08     | 1.51 |
| Consensus108 | Bacteroidetes(99);Bacteroidia(93);Bacteroidales(93);Porphyromonadaceae(92);Butyricimonas(5)                                                 | 0.48 | 0.63              | 0.09     | 1.51 |
| Consensus97  | Bacteroidetes(100);Bacteroidia(100);Bacteroidales(100);Rikenellaceae(100);Alistipes(100)                                                    | 0.64 | 0.39              | 0.09     | 1.43 |
| Consensus70  | Bacteroidetes(100);Bacteroidia(98);Bacteroidales(98);Porphyromonadaceae(87);Barnesiella(36)                                                 | 0.83 | 0.63              | 0.10     | 1.43 |
| Consensus95  | Firmicutes(100);Clostridia(100);Clostridiales(100);Lachnospiraceae(100);Lachnospiracea_incertae_sedis(58)                                   | 0.71 | 0.52              | 0.10     | 1.39 |
| Consensus44  | Proteobacteria(100);Epsilonproteobacteria(100);Campylobacteriales(100);Helicobacteraceae(100);Helicobacter(100)                             | 0.66 | 0.96              | 0.10     | 1.31 |
| Consensus185 | Bacteroidetes(100);Bacteroidia(91);Bacteroidales(91);Porphyromonadaceae(86);Paludibacter(17)                                                | 0.00 | 0.16              | 0.11     | 1.35 |
| Consensus62  | Firmicutes(100);Clostridia(100);Clostridiales(100);Lachnospiraceae(99);Clostridium_XIVa(32)                                                 | 0.54 | 0.84              | 0.11     | 1.31 |
| Consensus220 | Bacteroidetes(100);Bacteroidia(86);Bacteroidales(86);Porphyromonadaceae(71);Tannerella(28)                                                  | 0.20 | 0.08              | 0.12     | 1.32 |
| Consensus194 | Firmicutes(100);Clostridia(100);Clostridiales(100);Lachnospiraceae(94);Marvinbryantia(33)                                                   | 0.10 | 0.29              | 0.12     | 1.26 |
| Consensus43  | Firmicutes(98);Clostridia(98);Clostridiales(98);Ruminococcaceae(49);Sporobacter(9)                                                          | 1.02 | 0.76              | 0.13     | 1.31 |
| Consensus13  | Bacteroidetes(100);Bacteroidia(89);Bacteroidales(89);Prevotellaceae(76);Hallella(36)                                                        | 1.72 | 1.36              | 0.14     | 1.30 |
| Consensus9   | Bacteroidetes(100);Bacteroidia(91);Bacteroidales(91);Porphyromonadaceae(82);Butyricimonas(41)                                               | 2.01 | 1.86              | 0.14     | 1.27 |
| Consensus94  | Bacteroidetes(100);Bacteroidia(75);Bacteroidales(75);Porphyromonadaceae(69);Barnesiella(21)                                                 | 0.71 | 0.52              | 0.14     | 1.22 |
| Consensus145 | Actinobacteria(100);Actinobacteria(100);Coriobacteridae(100);Coriobacteriales(100);Coriobacterineae(100);Coriobacteriaceae(100);Slackia(37) | 0.33 | 0.48              | 0.14     | 1.17 |

|              |                                                                                                                                                |      |      |      |      |
|--------------|------------------------------------------------------------------------------------------------------------------------------------------------|------|------|------|------|
| Consensus142 | Firmicutes(100);Clostridia(100);Clostridiales(100);Lachnospiraceae(97);Moryella(1)                                                             | 0.46 | 0.24 | 0.14 | 1.13 |
| Consensus22  | Bacteroidetes(100);Bacteroidia(100);Bacteroidales(100);Porphyromonadaceae(99);Barnesiella(59)                                                  | 1.48 | 1.39 | 0.15 | 1.14 |
| Consensus110 | Firmicutes(100);Clostridia(100);Clostridiales(100);Lachnospiraceae(100);Lachnospiraceae_incertae_sedis(38)                                     | 0.07 | 0.28 | 0.15 | 1.13 |
| Consensus65  | Firmicutes(100);Clostridia(100);Clostridiales(100);Lachnospiraceae(100);Lachnospiraceae_incertae_sedis(37)                                     | 0.81 | 0.57 | 0.15 | 1.10 |
| Consensus15  | Firmicutes(100);Clostridia(100);Clostridiales(100);Lachnospiraceae(100);Lachnospiraceae_incertae_sedis(41)                                     | 1.30 | 1.58 | 0.15 | 1.08 |
| Consensus157 | Firmicutes(100);Clostridia(100);Clostridiales(100);Ruminococcaceae(100);Oscillibacter(99)                                                      | 0.28 | 0.46 | 0.16 | 1.07 |
| Consensus144 | Firmicutes(100);Clostridia(100);Clostridiales(100);Lachnospiraceae(97);Syntrophococcus(69)                                                     | 0.31 | 0.49 | 0.16 | 1.05 |
| Consensus118 | Firmicutes(100);Clostridia(100);Clostridiales(100);Lachnospiraceae(99);Coprococcus(14)                                                         | 0.58 | 0.35 | 0.16 | 1.06 |
| Consensus80  | Bacteroidetes(100);Bacteroidia(83);Bacteroidales(83);Porphyromonadaceae(66);Barnesiella(38)                                                    | 0.74 | 0.56 | 0.17 | 1.05 |
| Consensus4   | Root(100);Bacteria(99);Bacteroidetes(73);Sphingobacteria(31);Sphingobacteriales(31);Cyclobacteriaceae(9);Aq uiflexum(7)                        | 2.38 | 2.29 | 0.18 | 1.12 |
| Consensus77  | Firmicutes(84);Erysipelotrichia(8);Erysipelotrichales(8);Erysipelotrichaceae(8);Sharpea(33)                                                    | 0.36 | 0.59 | 0.19 | 1.14 |
| Consensus176 | Firmicutes(100);Clostridia(100);Clostridiales(100);Lachnospiraceae(100);Lactonifactor(15)                                                      | 0.32 | 0.15 | 0.20 | 1.13 |
| Consensus211 | Firmicutes(100);Clostridia(100);Clostridiales(100);Lachnospiraceae(100);Syntrophococcus(3)                                                     | 0.16 | 0.28 | 0.20 | 1.11 |
| Consensus123 | Firmicutes(78);Clostridia(72);Clostridiales(68);Veillonellaceae(33);Anaerovibrio(1)                                                            | 0.34 | 0.53 | 0.21 | 1.14 |
| Consensus41  | Firmicutes(100);Clostridia(100);Clostridiales(100);Lachnospiraceae(100);Clostridium XIVa(41)                                                   | 0.80 | 1.02 | 0.22 | 1.17 |
| Consensus16  | Bacteroidetes(100);Bacteroidia(79);Bacteroidales(79);Porphyromonadaceae(69);Barnesiella(3)                                                     | 1.58 | 1.66 | 0.22 | 1.15 |
| Consensus205 | Firmicutes(100);Clostridia(100);Clostridiales(100);Lachnospiraceae(100);Lachnospiraceae_incertae_sedis(44)                                     | 0.11 | 0.23 | 0.23 | 1.15 |
| Consensus125 | Firmicutes(100);Clostridia(99);Clostridiales(99);Lachnospiraceae(97);Robinsoniella(26)                                                         | 0.33 | 0.20 | 0.24 | 1.19 |
| Consensus127 | Firmicutes(99);Clostridia(99);Clostridiales(99);Clostridiales_Incertae Sedis XIII(53);Anaerovorax(38)                                          | 0.44 | 0.30 | 0.25 | 1.20 |
| Consensus85  | Bacteroidetes(100);Bacteroidia(82);Bacteroidales(82);Porphyromonadaceae(81);Tannerella(35)                                                     | 0.65 | 0.44 | 0.25 | 1.18 |
| Consensus88  | Bacteroidetes(98);Bacteroidia(9);Bacteroidales(9);Porphyromonadaceae(79);Barnesiella(33)                                                       | 0.68 | 0.56 | 0.25 | 1.17 |
| Consensus178 | Actinobacteria(100);Actinobacteria(100);Coriobacteridae(100);Coriobacteriales(100);Coriobacterineae(100);Cori obacteriaceae(100);Olsenella(75) | 0.11 | 0.24 | 0.25 | 1.15 |
| Consensus18  | Bacteroidetes(98);Bacteroidia(83);Bacteroidales(83);Porphyromonadaceae(75);Paludibacter(2)                                                     | 1.57 | 1.39 | 0.25 | 1.12 |
| Consensus202 | Firmicutes(100);Clostridia(100);Clostridiales(100);Ruminococcaceae(100);Flavonifractor(64)                                                     | 0.19 | 0.32 | 0.25 | 1.11 |
| Consensus136 | Firmicutes(100);Clostridia(100);Clostridiales(100);Ruminococcaceae(100);Flavonifractor(59)                                                     | 0.30 | 0.43 | 0.25 | 1.09 |
| Consensus139 | Firmicutes(100);Clostridia(100);Clostridiales(100);Lachnospiraceae(100);Lachnospiraceae_incertae_sedis(33)                                     | 0.30 | 0.45 | 0.26 | 1.08 |
| Consensus175 | Firmicutes(100);Clostridia(100);Clostridiales(100);Lachnospiraceae(96);Lachnospiraceae_incertae_sedis(31)                                      | 0.09 | 0.23 | 0.27 | 1.12 |

|              |                                                                                                                          |      |      |      |      |
|--------------|--------------------------------------------------------------------------------------------------------------------------|------|------|------|------|
| Consensus66  | Firmicutes(100);Clostridia(100);Clostridiales(100);Lachnospiraceae(96);Anaerostipes(71)                                  | 0.73 | 0.86 | 0.27 | 1.11 |
| Consensus210 | Bacteroidetes(100);Bacteroidia(100);Bacteroidales(100);Bacteroidaceae(100);Bacteroides(100)                              | 0.19 | 0.29 | 0.27 | 1.09 |
| Consensus128 | Firmicutes(98);Erysipelotrichia(93);Erysipelotrichales(93);Erysipelotrichaceae(93);Erysipelotrichaceae_incertae_sedis(9) | 0.21 | 0.36 | 0.28 | 1.11 |
| Consensus2   | Bacteroidetes(100);Bacteroidia(51);Bacteroidales(51);Porphyromonadaceae(35);Proteiniphilum(15)                           | 2.50 | 2.63 | 0.29 | 1.11 |
| Consensus69  | Firmicutes(100);Clostridia(100);Clostridiales(100);Lachnospiraceae(99);Butyrivibrio(26)                                  | 0.76 | 0.55 | 0.29 | 1.10 |
| Consensus102 | Proteobacteria(89);Alphaproteobacteria(87);Kiloniellales(16);Kiloniellaceae(16);Kiloniella(16)                           | 0.35 | 0.50 | 0.29 | 1.08 |
| Consensus26  | Firmicutes(100);Clostridia(100);Clostridiales(100);Lachnospiraceae(100);Roseburia(55)                                    | 0.94 | 1.19 | 0.29 | 1.07 |
| Consensus212 | Bacteroidetes(100);Bacteroidia(96);Bacteroidales(96);Porphyromonadaceae(85);Tannerella(21)                               | 0.30 | 0.19 | 0.30 | 1.08 |
| Consensus114 | Firmicutes(99);Clostridia(99);Clostridiales(99);Lachnospiraceae(97);Robinsoniella(49)                                    | 0.43 | 0.25 | 0.31 | 1.09 |
| Consensus133 | Bacteroidetes(100);Bacteroidia(72);Bacteroidales(72);Porphyromonadaceae(45);Tannerella(17)                               | 0.37 | 0.26 | 0.31 | 1.07 |
| Consensus170 | Firmicutes(100);Clostridia(100);Clostridiales(100);Lachnospiraceae(100);Robinsoniella(22)                                | 0.12 | 0.26 | 0.32 | 1.08 |
| Consensus217 | Firmicutes(100);Clostridia(100);Clostridiales(100);Ruminococcaceae(100);Oscillibacter(98)                                | 0.22 | 0.12 | 0.32 | 1.07 |
| Consensus38  | Bacteroidetes(100);Bacteroidia(100);Bacteroidales(100);Bacteroidaceae(100);Bacteroides(100)                              | 1.00 | 1.12 | 0.33 | 1.10 |
| Consensus74  | Bacteroidetes(99);Bacteroidia(65);Bacteroidales(65);Porphyromonadaceae(41);Butyricimonas(27)                             | 0.64 | 0.78 | 0.33 | 1.09 |
| Consensus167 | Firmicutes(85);Clostridia(85);Clostridiales(85);Peptococcaceae_1(44);Peptococcus(44)                                     | 0.12 | 0.24 | 0.34 | 1.09 |
| Consensus33  | Firmicutes(98);Clostridia(98);Clostridiales(98);Ruminococcaceae(97);Clostridium_IV(56)                                   | 0.83 | 1.02 | 0.35 | 1.10 |
| Consensus124 | Firmicutes(100);Clostridia(100);Clostridiales(100);Lachnospiraceae(100);Dorea(42)                                        | 0.36 | 0.23 | 0.35 | 1.10 |
| Consensus98  | Firmicutes(100);Clostridia(100);Clostridiales(100);Ruminococcaceae(100);Pseudoflavonifractor(4)                          | 0.58 | 0.67 | 0.35 | 1.09 |
| Consensus93  | Firmicutes(100);Clostridia(100);Clostridiales(100);Lachnospiraceae(100);Clostridium_XIVa(48)                             | 0.50 | 0.65 | 0.35 | 1.08 |
| Consensus27  | TM7(100);TM7_genera_incertae_sedis(100)                                                                                  | 1.41 | 1.32 | 0.36 | 1.07 |
| Consensus203 | Firmicutes(100);Clostridia(100);Clostridiales(100);Ruminococcaceae(100);Hydrogenoanaerobacterium(43)                     | 0.17 | 0.26 | 0.36 | 1.06 |
| Consensus158 | Bacteroidetes(99);Bacteroidia(6);Bacteroidales(6);Porphyromonadaceae(36);Tannerella(1)                                   | 0.31 | 0.39 | 0.36 | 1.05 |
| Consensus164 | Firmicutes(100);Clostridia(100);Clostridiales(100);Lachnospiraceae(97);Acetitomaculum(49)                                | 0.40 | 0.30 | 0.36 | 1.05 |
| Consensus140 | Firmicutes(100);Clostridia(100);Clostridiales(100);Lachnospiraceae(100);Coprococcus(12)                                  | 0.26 | 0.12 | 0.37 | 1.05 |
| Consensus83  | Firmicutes(100);Clostridia(100);Clostridiales(100);Lachnospiraceae(100);Lachnospiraceae_incertae_sedis(64)               | 0.30 | 0.49 | 0.37 | 1.04 |
| Consensus61  | Bacteroidetes(99);Bacteroidia(71);Bacteroidales(71);Porphyromonadaceae(69);Barnesiella(32)                               | 0.71 | 0.83 | 0.37 | 1.03 |
| Consensus82  | Bacteroidetes(99);Flavobacteria(47);Flavobacteriales(47);Cryomorphaceae(47);Fluviicola(46)                               | 0.47 | 0.63 | 0.37 | 1.02 |

|              |                                                                                                                      |      |      |      |      |
|--------------|----------------------------------------------------------------------------------------------------------------------|------|------|------|------|
| Consensus149 | Firmicutes(100);Clostridia(100);Clostridiales(100);Lachnospiraceae(100);Syntrophococcus(6)                           | 0.32 | 0.20 | 0.38 | 1.02 |
| Consensus172 | Bacteroidetes(100);Bacteroidia(7);Bacteroidales(7);Porphyromonadaceae(62);Tannerella(9)                              | 0.28 | 0.37 | 0.38 | 1.02 |
| Consensus219 | Bacteroidetes(100);Bacteroidia(94);Bacteroidales(94);Porphyromonadaceae(87);Butyricimonas(48)                        | 0.12 | 0.21 | 0.39 | 1.02 |
| Consensus195 | Firmicutes(100);Clostridia(100);Clostridiales(100);Lachnospiraceae(100);Butyrivibrio(5)                              | 0.28 | 0.19 | 0.39 | 1.01 |
| Consensus232 | Firmicutes(100);Clostridia(100);Clostridiales(100);Ruminococcaceae(100);Oscillibacter(77)                            | 0.17 | 0.08 | 0.39 | 1.01 |
| Consensus51  | Bacteroidetes(100);Bacteroidia(77);Bacteroidales(77);Porphyromonadaceae(7);Barnesiella(25)                           | 0.88 | 0.75 | 0.39 | 1.00 |
| Consensus20  | Bacteroidetes(100);Bacteroidia(98);Bacteroidales(98);Porphyromonadaceae(86);Tannerella(51)                           | 1.47 | 1.56 | 0.39 | 0.99 |
| Consensus11  | Bacteroidetes(100);Bacteroidia(81);Bacteroidales(81);Porphyromonadaceae(81);Paludibacter(31)                         | 1.67 | 1.59 | 0.40 | 0.98 |
| Consensus71  | Firmicutes(100);Clostridia(100);Clostridiales(100);Ruminococcaceae(100);Anaerotruncus(95)                            | 0.67 | 0.80 | 0.40 | 0.98 |
| Consensus89  | Firmicutes(100);Bacilli(100);Bacillales(100);Staphylococcaceae(100);Staphylococcus(100)                              | 0.29 | 0.16 | 0.40 | 0.97 |
| Consensus100 | Firmicutes(89);Clostridia(83);Clostridiales(83);Lachnospiraceae(17);Cellulosilyticum(1)                              | 0.43 | 0.55 | 0.40 | 0.97 |
| Consensus1   | Firmicutes(100);Bacilli(100);Lactobacillales(100);Lactobacillaceae(100);Lactobacillus(100)                           | 2.60 | 2.48 | 0.40 | 0.96 |
| Consensus207 | Firmicutes(100);Clostridia(100);Clostridiales(100);Ruminococcaceae(100);Butyricoccus(100)                            | 0.16 | 0.07 | 0.40 | 0.95 |
| Consensus109 | Firmicutes(100);Clostridia(100);Clostridiales(100);Lachnospiraceae(98);Robinsoniella(39)                             | 0.50 | 0.37 | 0.40 | 0.94 |
| Consensus204 | Firmicutes(100);Clostridia(100);Clostridiales(100);Lachnospiraceae(100);Lachnospiraceae_incertae_sedis(71)           | 0.16 | 0.26 | 0.41 | 0.94 |
| Consensus5   | Firmicutes(100);Bacilli(100);Lactobacillales(100);Lactobacillaceae(100);Lactobacillus(100)                           | 1.98 | 1.81 | 0.41 | 0.93 |
| Consensus161 | Proteobacteria(79);Deltaproteobacteria(48);Bdellovibrionales(32);Bdellovibrionaceae(32);Vampirovibrio(32)            | 0.33 | 0.41 | 0.42 | 0.95 |
| Consensus192 | Firmicutes(68);Bacilli(39);Bacillales(27);Bacillaceae_2(17);Paucisalibacillus(1)                                     | 0.25 | 0.13 | 0.42 | 0.94 |
| Consensus47  | Firmicutes(100);Bacilli(100);Lactobacillales(100);Lactobacillaceae(100);Lactobacillus(100)                           | 0.89 | 0.75 | 0.42 | 0.93 |
| Consensus8   | Bacteroidetes(100);Bacteroidia(9);Bacteroidales(9);Porphyromonadaceae(76);Butyricimonas(18)                          | 1.97 | 1.90 | 0.43 | 0.93 |
| Consensus76  | Firmicutes(100);Clostridia(100);Clostridiales(100);Ruminococcaceae(100);Oscillibacter(100)                           | 0.57 | 0.70 | 0.43 | 0.94 |
| Consensus165 | Firmicutes(100);Clostridia(100);Clostridiales(100);Lachnospiraceae(95);Clostridium_XIVa(33)                          | 0.02 | 0.13 | 0.44 | 0.93 |
| Consensus150 | Firmicutes(100);Clostridia(100);Clostridiales(100);Lachnospiraceae(100);Syntrophococcus(89)                          | 0.41 | 0.31 | 0.45 | 0.95 |
| Consensus30  | Firmicutes(100);Clostridia(100);Clostridiales(100);Lachnospiraceae(89);Acetitomaculum(2)                             | 0.85 | 0.68 | 0.45 | 0.96 |
| Consensus36  | Root(100);Bacteria(99);Bacteroidetes(96);Bacteroidia(63);Bacteroidales(63);Porphyromonadaceae(48);Proteiniphilum(23) | 1.07 | 1.15 | 0.46 | 0.95 |
| Consensus148 | Bacteroidetes(100);Bacteroidia(100);Bacteroidales(100);Rikenellaceae(100);Alistipes(100)                             | 0.36 | 0.27 | 0.47 | 0.97 |
| Consensus214 | Bacteroidetes(99);Bacteroidia(94);Bacteroidales(94);Porphyromonadaceae(78);Butyricimonas(29)                         | 0.24 | 0.17 | 0.48 | 0.97 |

|              |                                                                                                           |      |      |      |      |
|--------------|-----------------------------------------------------------------------------------------------------------|------|------|------|------|
| Consensus42  | Firmicutes(100);Clostridia(100);Clostridiales(100);Lachnospiraceae(96);Robinsoniella(12)                  | 0.74 | 0.58 | 0.48 | 0.98 |
| Consensus6   | Firmicutes(91);Erysipelotrichia(85);Erysipelotrichales(85);Erysipelotrichaceae(85);Allobaculum(63)        | 1.53 | 1.70 | 0.48 | 0.97 |
| Consensus143 | Firmicutes(100);Clostridia(100);Clostridiales(100);Ruminococcaceae(100);Oscillibacter(100)                | 0.42 | 0.34 | 0.48 | 0.97 |
| Consensus64  | Firmicutes(100);Clostridia(100);Clostridiales(100);Lachnospiraceae(99);Syntrophococcus(62)                | 0.15 | 0.29 | 0.49 | 0.97 |
| Consensus215 | Firmicutes(99);Clostridia(99);Clostridiales(99);Ruminococcaceae(99);Acetanaerobacterium(49)               | 0.21 | 0.14 | 0.49 | 0.96 |
| Consensus21  | Firmicutes(100);Clostridia(100);Clostridiales(100);Lachnospiraceae(99);Butyrivibrio(52)                   | 1.27 | 1.41 | 0.49 | 0.95 |
| Consensus169 | Bacteroidetes(100);Bacteroidia(93);Bacteroidales(93);Porphyromonadaceae(87);Tannerella(39)                | 0.34 | 0.26 | 0.49 | 0.95 |
| Consensus156 | Firmicutes(100);Clostridia(100);Clostridiales(100);Lachnospiraceae(100);Robinsoniella(29)                 | 0.34 | 0.25 | 0.50 | 0.94 |
| Consensus34  | Bacteroidetes(93);Sphingobacteria(47);Sphingobacteriales(47);Cytophagaceae(26);Meniscus(25)               | 1.03 | 1.11 | 0.50 | 0.95 |
| Consensus87  | Bacteroidetes(99);Bacteroidia(97);Bacteroidales(97);Porphyromonadaceae(91);Barnesiella(57)                | 0.67 | 0.59 | 0.51 | 0.95 |
| Consensus190 | Firmicutes(100);Clostridia(100);Clostridiales(100);Lachnospiraceae(98);Clostridium XIVb(98)               | 0.20 | 0.27 | 0.51 | 0.94 |
| Consensus132 | Firmicutes(100);Clostridia(100);Clostridiales(100);Lachnospiraceae(100);Lachnospiracea_incertae_sedis(84) | 0.47 | 0.53 | 0.52 | 0.96 |
| Consensus216 | Firmicutes(100);Clostridia(100);Clostridiales(100);Lachnospiraceae(100);Clostridium XIVa(43)              | 0.18 | 0.23 | 0.53 | 0.96 |
| Consensus226 | Firmicutes(100);Clostridia(100);Clostridiales(100);Lachnospiraceae(100);Marvinbryantia(46)                | 0.10 | 0.16 | 0.53 | 0.96 |
| Consensus91  | Bacteroidetes(100);Bacteroidia(84);Bacteroidales(84);Porphyromonadaceae(79);Tannerella(28)                | 0.62 | 0.70 | 0.53 | 0.95 |
| Consensus12  | Bacteroidetes(100);Bacteroidia(94);Bacteroidales(94);Porphyromonadaceae(79);Barnesiella(34)               | 1.69 | 1.63 | 0.53 | 0.95 |
| Consensus37  | Bacteroidetes(100);Bacteroidia(100);Bacteroidales(100);Rikenellaceae(100);Alistipes(100)                  | 1.09 | 1.00 | 0.54 | 0.95 |
| Consensus119 | Firmicutes(100);Clostridia(100);Clostridiales(100);Lachnospiraceae(100);Coprococcus(18)                   | 0.32 | 0.41 | 0.54 | 0.95 |
| Consensus39  | Bacteroidetes(100);Bacteroidia(100);Bacteroidales(100);Porphyromonadaceae(100);Parabacteroides(100)       | 0.98 | 1.07 | 0.55 | 0.95 |
| Consensus113 | Firmicutes(100);Clostridia(100);Clostridiales(100);Lachnospiraceae(100);Clostridium XIVa(53)              | 0.23 | 0.32 | 0.55 | 0.94 |
| Consensus179 | Bacteroidetes(100);Bacteroidia(100);Bacteroidales(100);Porphyromonadaceae(100);Odoribacter(99)            | 0.33 | 0.28 | 0.55 | 0.94 |
| Consensus182 | Bacteroidetes(100);Bacteroidia(100);Bacteroidales(100);Rikenellaceae(100);Alistipes(100)                  | 0.30 | 0.24 | 0.56 | 0.96 |
| Consensus160 | Firmicutes(100);Clostridia(100);Clostridiales(100);Lachnospiraceae(99);Robinsoniella(34)                  | 0.38 | 0.30 | 0.58 | 0.97 |
| Consensus84  | Bacteroidetes(100);Bacteroidia(93);Bacteroidales(93);Porphyromonadaceae(78);Tannerella(26)                | 0.65 | 0.72 | 0.58 | 0.97 |
| Consensus181 | Bacteroidetes(100);Bacteroidia(100);Bacteroidales(100);Prevotellaceae(91);Paraprevotella(89)              | 0.19 | 0.26 | 0.58 | 0.96 |
| Consensus28  | Firmicutes(100);Clostridia(100);Clostridiales(100);Lachnospiraceae(99);Anaerostipes(32)                   | 1.34 | 1.27 | 0.59 | 0.97 |
| Consensus19  | Bacteroidetes(100);Bacteroidia(97);Bacteroidales(97);Porphyromonadaceae(86);Barnesiella(52)               | 1.39 | 1.47 | 0.59 | 0.97 |

|              |                                                                                                                                                    |      |      |      |      |
|--------------|----------------------------------------------------------------------------------------------------------------------------------------------------|------|------|------|------|
| Consensus104 | Bacteroidetes(100);Bacteroidia(97);Bacteroidales(97);Porphyromonadaceae(76);Barnesiella(49)                                                        | 0.31 | 0.22 | 0.60 | 0.97 |
| Consensus58  | Firmicutes(100);Clostridia(99);Clostridiales(99);Lachnospiraceae(99);Acetomaculum(4)                                                               | 0.64 | 0.74 | 0.60 | 0.96 |
| Consensus188 | Firmicutes(100);Clostridia(100);Clostridiales(100);Lachnospiraceae(100);Robinsoniella(39)                                                          | 0.19 | 0.26 | 0.60 | 0.96 |
| Consensus49  | Bacteroidetes(100);Bacteroidia(86);Bacteroidales(86);Porphyromonadaceae(82);Barnesiella(42)                                                        | 0.90 | 0.95 | 0.61 | 0.97 |
| Consensus3   | Firmicutes(63);Clostridia(57);Clostridiales(56);Clostridiales_Incertae Sedis XI(25);Finegoldia(17)                                                 | 0.50 | 0.41 | 0.62 | 0.97 |
| Consensus131 | Actinobacteria(100);Actinobacteria(100);Coriobacteridae(100);Coriobacteriales(100);Coriobacterineae(100);Coriobacteriaceae(100);Enterorhabdus(100) | 0.40 | 0.44 | 0.62 | 0.97 |
| Consensus168 | Firmicutes(100);Clostridia(100);Clostridiales(100);Ruminococcaceae(98);Anaerotruncus(45)                                                           | 0.29 | 0.23 | 0.63 | 0.97 |
| Consensus17  | Firmicutes(100);Erysipelotrichia(100);Erysipelotrichales(100);Erysipelotrichaceae(100);Turicibacter(100)                                           | 0.68 | 0.84 | 0.63 | 0.96 |
| Consensus134 | Firmicutes(99);Clostridia(99);Clostridiales(99);Ruminococcaceae(99);Acetanaerobacterium(37)                                                        | 0.37 | 0.43 | 0.63 | 0.96 |
| Consensus177 | Firmicutes(100);Clostridia(100);Clostridiales(100);Lachnospiraceae(100);Lachnospiraceae_incertae_sedis(4)                                          | 0.27 | 0.21 | 0.63 | 0.97 |
| Consensus180 | Bacteroidetes(100);Bacteroidia(100);Bacteroidales(100);Rikenellaceae(100);Alistipes(99)                                                            | 0.30 | 0.35 | 0.64 | 0.97 |
| Consensus59  | Bacteroidetes(100);Bacteroidia(96);Bacteroidales(96);Porphyromonadaceae(95);Barnesiella(42)                                                        | 0.84 | 0.77 | 0.65 | 0.97 |
| Consensus184 | Firmicutes(100);Clostridia(100);Clostridiales(100);Lachnospiraceae(100);Roseburia(79)                                                              | 0.18 | 0.22 | 0.66 | 0.98 |
| Consensus23  | Firmicutes(99);Erysipelotrichia(92);Erysipelotrichales(92);Erysipelotrichaceae(92);Allobaculum(55)                                                 | 0.90 | 1.01 | 0.66 | 0.98 |
| Consensus92  | Bacteroidetes(100);Bacteroidia(94);Bacteroidales(94);Porphyromonadaceae(91);Tannerella(3)                                                          | 0.57 | 0.63 | 0.66 | 0.97 |
| Consensus126 | Firmicutes(100);Clostridia(100);Clostridiales(100);Lachnospiraceae(96);Syntrophococcus(28)                                                         | 0.43 | 0.37 | 0.67 | 0.97 |
| Consensus81  | Firmicutes(100);Clostridia(100);Clostridiales(100);Ruminococcaceae(100);Anaerotruncus(57)                                                          | 0.65 | 0.60 | 0.67 | 0.97 |
| Consensus183 | Firmicutes(100);Clostridia(100);Clostridiales(100);Lachnospiraceae(100);Lachnospiraceae_incertae_sedis(42)                                         | 0.28 | 0.23 | 0.67 | 0.96 |
| Consensus154 | Firmicutes(100);Clostridia(100);Clostridiales(100);Lachnospiraceae(100);Lachnospiraceae_incertae_sedis(75)                                         | 0.42 | 0.37 | 0.67 | 0.96 |
| Consensus201 | Firmicutes(94);Clostridia(83);Clostridiales(83);Peptococcaceae 1(11);Desulfonispota(1)                                                             | 0.15 | 0.19 | 0.68 | 0.96 |
| Consensus221 | Firmicutes(100);Clostridia(100);Clostridiales(100);Lachnospiraceae(100);Coproccoccus(43)                                                           | 0.13 | 0.17 | 0.68 | 0.96 |
| Consensus196 | Firmicutes(100);Clostridia(100);Clostridiales(100);Lachnospiraceae(99);Syntrophococcus(68)                                                         | 0.19 | 0.23 | 0.68 | 0.96 |
| Consensus152 | Bacteroidetes(100);Bacteroidia(100);Bacteroidales(100);Bacteroidaceae(100);Bacteroides(100)                                                        | 0.29 | 0.23 | 0.69 | 0.96 |
| Consensus137 | Firmicutes(100);Clostridia(100);Clostridiales(100);Ruminococcaceae(100);Oscillibacter(71)                                                          | 0.38 | 0.43 | 0.69 | 0.96 |
| Consensus230 | Firmicutes(100);Erysipelotrichia(100);Erysipelotrichales(100);Erysipelotrichaceae(100);Coproccoccus(84)                                            | 0.09 | 0.12 | 0.69 | 0.95 |
| Consensus78  | Bacteroidetes(100);Bacteroidia(100);Bacteroidales(100);Rikenellaceae(100);Alistipes(100)                                                           | 0.63 | 0.69 | 0.71 | 0.97 |
| Consensus171 | Firmicutes(100);Clostridia(100);Clostridiales(100);Lachnospiraceae(100);Clostridium XIVa(66)                                                       | 0.29 | 0.24 | 0.72 | 0.98 |

|              |                                                                                                           |      |      |      |      |
|--------------|-----------------------------------------------------------------------------------------------------------|------|------|------|------|
| Consensus141 | Firmicutes(100);Clostridia(100);Clostridiales(100);Clostridiaceae 1(100);Clostridium sensu stricto(100)   | 0.11 | 0.15 | 0.73 | 0.98 |
| Consensus121 | Firmicutes(100);Clostridia(100);Clostridiales(100);Lachnospiraceae(98);Robinsoniella(35)                  | 0.33 | 0.28 | 0.73 | 0.98 |
| Consensus147 | Bacteroidetes(100);Bacteroidia(99);Bacteroidales(99);Rikenellaceae(99);Alistipes(99)                      | 0.34 | 0.30 | 0.74 | 0.99 |
| Consensus186 | Firmicutes(100);Clostridia(100);Clostridiales(100);Ruminococcaceae(99);Anaerotruncus(43)                  | 0.23 | 0.27 | 0.74 | 0.98 |
| Consensus101 | Firmicutes(100);Clostridia(100);Clostridiales(100);Lachnospiraceae(99);Robinsoniella(29)                  | 0.50 | 0.44 | 0.74 | 0.98 |
| Consensus14  | Bacteroidetes(100);Bacteroidia(88);Bacteroidales(88);Porphyromonadaceae(77);Tannerella(34)                | 1.52 | 1.56 | 0.75 | 0.98 |
| Consensus96  | Firmicutes(100);Clostridia(100);Clostridiales(100);Ruminococcaceae(100);Pseudoflavonifractor(64)          | 0.55 | 0.51 | 0.75 | 0.98 |
| Consensus25  | Bacteroidetes(99);Bacteroidia(9);Bacteroidales(9);Porphyromonadaceae(8);Paludibacter(18)                  | 1.39 | 1.36 | 0.75 | 0.97 |
| Consensus99  | Firmicutes(99);Clostridia(99);Clostridiales(99);Lachnospiraceae(91);Syntrophococcus(6)                    | 0.52 | 0.47 | 0.77 | 0.99 |
| Consensus120 | Firmicutes(91);Clostridia(91);Clostridiales(91);Peptococcaceae 1(2);Peptococcus(2)                        | 0.27 | 0.31 | 0.77 | 0.99 |
| Consensus35  | Firmicutes(100);Clostridia(100);Clostridiales(100);Lachnospiraceae(100);Anaerostipes(28)                  | 0.75 | 0.82 | 0.77 | 0.98 |
| Consensus67  | Firmicutes(100);Clostridia(100);Clostridiales(100);Ruminococcaceae(97);Ruminococcus(96)                   | 0.61 | 0.65 | 0.78 | 0.98 |
| Consensus173 | Firmicutes(100);Clostridia(100);Clostridiales(100);Ruminococcaceae(100);Butyricoccus(99)                  | 0.22 | 0.26 | 0.78 | 0.98 |
| Consensus63  | Firmicutes(100);Clostridia(87);Clostridiales(87);Lachnospiraceae(82);Lachnobacterium(16)                  | 0.68 | 0.62 | 0.78 | 0.98 |
| Consensus159 | Firmicutes(100);Clostridia(100);Clostridiales(100);Lachnospiraceae(100);Clostridium XIVa(9)               | 0.37 | 0.33 | 0.79 | 0.99 |
| Consensus10  | Bacteroidetes(100);Bacteroidia(96);Bacteroidales(96);Porphyromonadaceae(76);Barnesiella(32)               | 1.79 | 1.76 | 0.81 | 1.00 |
| Consensus55  | Firmicutes(100);Clostridia(100);Clostridiales(100);Lachnospiraceae(97);Robinsoniella(47)                  | 0.66 | 0.62 | 0.81 | 1.00 |
| Consensus193 | Bacteroidetes(100);Bacteroidia(76);Bacteroidales(76);Rikenellaceae(72);Rikenella(48)                      | 0.25 | 0.28 | 0.81 | 0.99 |
| Consensus52  | Firmicutes(100);Clostridia(100);Clostridiales(100);Lachnospiraceae(100);Lachnospiracea_incertae_sedis(56) | 0.22 | 0.16 | 0.81 | 0.99 |
| Consensus56  | Bacteroidetes(100);Sphingobacteria(34);Sphingobacteriales(34);Cytophagaceae(33);Meniscus(33)              | 0.73 | 0.77 | 0.82 | 0.99 |
| Consensus166 | Bacteroidetes(99);Bacteroidia(88);Bacteroidales(88);Porphyromonadaceae(8);Barnesiella(37)                 | 0.26 | 0.29 | 0.82 | 0.99 |
| Consensus227 | Firmicutes(100);Clostridia(100);Clostridiales(100);Ruminococcaceae(100);Pseudoflavonifractor(91)          | 0.15 | 0.17 | 0.82 | 0.98 |
| Consensus29  | Firmicutes(92);Clostridia(82);Clostridiales(82);Lachnospiraceae(47);Sporobacterium(34)                    | 0.93 | 0.88 | 0.82 | 0.98 |
| Consensus213 | Firmicutes(100);Clostridia(100);Clostridiales(100);Ruminococcaceae(99);Anaerotruncus(58)                  | 0.16 | 0.18 | 0.84 | 0.99 |
| Consensus112 | Firmicutes(100);Clostridia(100);Clostridiales(100);Lachnospiraceae(92);Coprococcus(19)                    | 0.51 | 0.48 | 0.84 | 0.99 |
| Consensus174 | Firmicutes(99);Clostridia(99);Clostridiales(99);Lachnospiraceae(99);Lachnospiracea_incertae_sedis(31)     | 0.28 | 0.26 | 0.86 | 1.00 |
| Consensus75  | Bacteroidetes(100);Sphingobacteria(37);Sphingobacteriales(37);Cytophagaceae(32);Meniscus(29)              | 0.70 | 0.72 | 0.87 | 1.02 |

|              |                                                                                                           |      |      |      |      |
|--------------|-----------------------------------------------------------------------------------------------------------|------|------|------|------|
| Consensus115 | Bacteroidetes(100);Bacteroidia(52);Bacteroidales(52);Porphyromonadaceae(35);Tannerella(11)                | 0.51 | 0.53 | 0.88 | 1.02 |
| Consensus135 | Firmicutes(6);Erysipelotrichia(31);Erysipelotrichales(31);Erysipelotrichaceae(31);Allobaculum(26)         | 0.38 | 0.40 | 0.88 | 1.01 |
| Consensus223 | Firmicutes(100);Clostridia(100);Clostridiales(100);Lachnospiraceae(99);Butyrivibrio(77)                   | 0.18 | 0.16 | 0.88 | 1.01 |
| Consensus68  | Bacteroidetes(100);Bacteroidia(97);Bacteroidales(97);Porphyromonadaceae(85);Barnesiella(44)               | 0.77 | 0.79 | 0.89 | 1.01 |
| Consensus40  | Firmicutes(100);Clostridia(100);Clostridiales(100);Lachnospiraceae(99);Lachnospiracea_incertae_sedis(31)  | 0.62 | 0.65 | 0.89 | 1.01 |
| Consensus146 | Firmicutes(100);Clostridia(100);Clostridiales(100);Ruminococcaceae(100);Pseudoflavonifractor(77)          | 0.36 | 0.38 | 0.90 | 1.02 |
| Consensus191 | Firmicutes(100);Clostridia(100);Clostridiales(100);Lachnospiraceae(99);Acetitomaculum(25)                 | 0.23 | 0.24 | 0.90 | 1.01 |
| Consensus60  | Firmicutes(100);Clostridia(100);Clostridiales(100);Lachnospiraceae(94);Robinsoniella(27)                  | 0.60 | 0.62 | 0.90 | 1.01 |
| Consensus151 | Firmicutes(100);Clostridia(100);Clostridiales(100);Lachnospiraceae(100);Lachnospiracea_incertae_sedis(47) | 0.31 | 0.32 | 0.92 | 1.02 |
| Consensus72  | Bacteroidetes(100);Bacteroidia(97);Bacteroidales(97);Porphyromonadaceae(97);Barnesiella(46)               | 0.69 | 0.67 | 0.93 | 1.02 |
| Consensus228 | Firmicutes(100);Clostridia(100);Clostridiales(100);Ruminococcaceae(100);Clostridium IV(69)                | 0.12 | 0.13 | 0.93 | 1.03 |
| Consensus111 | Firmicutes(100);Clostridia(100);Clostridiales(100);Ruminococcaceae(100);Oscillibacter(75)                 | 0.33 | 0.34 | 0.94 | 1.03 |
| Consensus225 | Firmicutes(100);Clostridia(100);Clostridiales(100);Ruminococcaceae(100);Oscillibacter(82)                 | 0.14 | 0.15 | 0.94 | 1.02 |
| Consensus117 | Firmicutes(100);Clostridia(100);Clostridiales(100);Lachnospiraceae(100);Clostridium XIVa(38)              | 0.47 | 0.47 | 0.94 | 1.02 |
| Consensus105 | Firmicutes(100);Clostridia(100);Clostridiales(100);Ruminococcaceae(100);Anaerotruncus(98)                 | 0.49 | 0.50 | 0.95 | 1.02 |
| Consensus54  | Proteobacteria(100);Betaproteobacteria(100);Burkholderiales(100);Sutterellaceae(100);Parasutterella(100)  | 0.75 | 0.76 | 0.95 | 1.02 |
| Consensus32  | Bacteroidetes(100);Bacteroidia(84);Bacteroidales(84);Porphyromonadaceae(77);Tannerella(38)                | 0.30 | 0.32 | 0.95 | 1.02 |
| Consensus103 | Firmicutes(100);Clostridia(100);Clostridiales(99);Lachnospiraceae(81);Lachnobacterium(2)                  | 0.49 | 0.48 | 0.95 | 1.01 |
| Consensus90  | Firmicutes(88);Clostridia(88);Clostridiales(88);Ruminococcaceae(46);Anaerotruncus(16)                     | 0.64 | 0.65 | 0.97 | 1.02 |
| Consensus79  | Firmicutes(100);Clostridia(100);Clostridiales(100);Lachnospiraceae(99);Robinsoniella(76)                  | 0.62 | 0.62 | 0.97 | 1.02 |
| Consensus130 | Firmicutes(100);Clostridia(100);Clostridiales(100);Lachnospiraceae(100);Lachnospiracea_incertae_sedis(53) | 0.32 | 0.31 | 0.98 | 1.02 |
| Consensus122 | Firmicutes(100);Clostridia(100);Clostridiales(100);Lachnospiraceae(97);Robinsoniella(48)                  | 0.37 | 0.37 | 0.98 | 1.02 |
| Consensus50  | Bacteroidetes(99);Bacteroidia(71);Bacteroidales(71);Rikenellaceae(16);Rikenella(16)                       | 0.88 | 0.88 | 0.98 | 1.01 |
| Consensus24  | Bacteroidetes(100);Bacteroidia(72);Bacteroidales(72);Marinilabiaceae(12);Anaerophaga(12)                  | 1.22 | 1.23 | 0.98 | 1.01 |
| Consensus46  | Firmicutes(100);Clostridia(100);Clostridiales(100);Lachnospiraceae(100);Marvinbryantia(95)                | 0.82 | 0.83 | 0.98 | 1.00 |
| Consensus116 | Bacteroidetes(100);Bacteroidia(100);Bacteroidales(100);Bacteroidaceae(100);Bacteroides(100)               | 0.50 | 0.50 | 0.98 | 1.01 |
| Consensus48  | Firmicutes(100);Clostridia(100);Clostridiales(100);Lachnospiraceae(100);Lachnospiracea_incertae_sedis(53) | 0.69 | 0.70 | 0.99 | 1.01 |



|              |                                                                                             |      |      |      |      |
|--------------|---------------------------------------------------------------------------------------------|------|------|------|------|
| Consensus209 | Bacteroidetes(100);Bacteroidia(98);Bacteroidales(98);Porphyromonadaceae(95);Odoribacter(88) | 0.13 | 0.13 | 0.99 | 1.01 |
| Consensus206 | Firmicutes(100);Clostridia(100);Clostridiales(100);Ruminococcaceae(100);Oscillibacter(83)   | 0.21 | 0.21 | 0.99 | 1.00 |
| Consensus86  | Firmicutes(97);Clostridia(95);Clostridiales(95);Lachnospiraceae(85);Sporobacterium(24)      | 0.33 | 0.32 | 0.99 | 1.00 |
| Consensus73  | Firmicutes(100);Clostridia(100);Clostridiales(100);Ruminococcaceae(100);Oscillibacter(99)   | 0.66 | 0.66 | 1.00 | 1.00 |

**Supplemental Table 3.** *OTU distribution in WT and Nod2<sup>-/-</sup> mice.* For all OTUs with at least 25 sequences observed in stool samples, this table demonstrates the results of a t-test in which the null hypothesis that the distribution of the OTU is the same in WT and *Nod2<sup>-/-</sup>* animals. The “OTU” column is an identifier which can be used to map the exact sequence of the OTU using the supplemental sequence file available for this manuscript. The “RDP output” shows the results of running the consensus sequence from AbundantOTU for each OTU through the stand-alone RDP classifier version 2.4. Numbers in parentheses represent scores assigned by the classifier to indicate the strength of the match. The “MTC” column shows correction for multiple testing (in this case testing 219 OTUs) using the Benjamini and Hochberg procedure. In this analysis, the average value for WT and KO animals in each cage was used, although very similar results were obtained considering each OTU values for each animal independently of cage (data not shown).
