# Supplementary figures and images for: Mouse Paneth cell antimicrobial function is independent of Nod2
Source: HighWire-hosted journal article supplement (doi:10.1136/gutjnl-2012-304190), 2013-03-19

## Supplemental Figure 2.

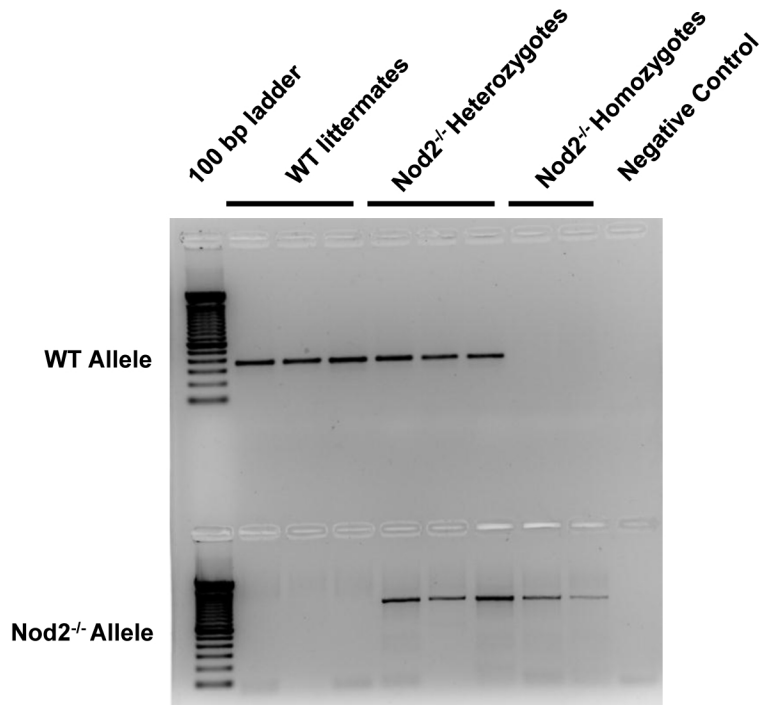

Supplement: gutjnl-2012-304190supp_figure2.pdf [file gutjnl-2012-304190supp_figure2.pdf]

Supplemental Figure 4.

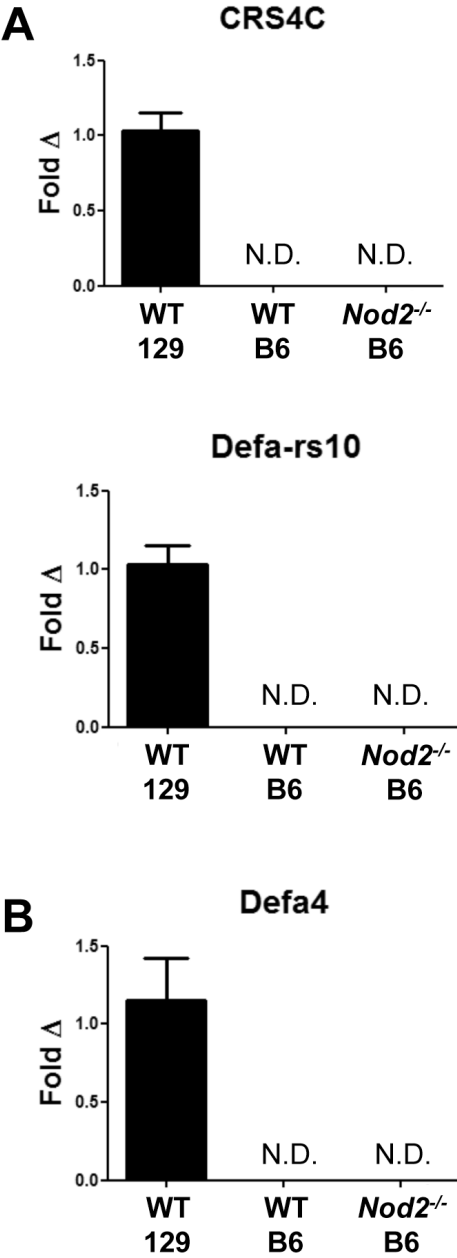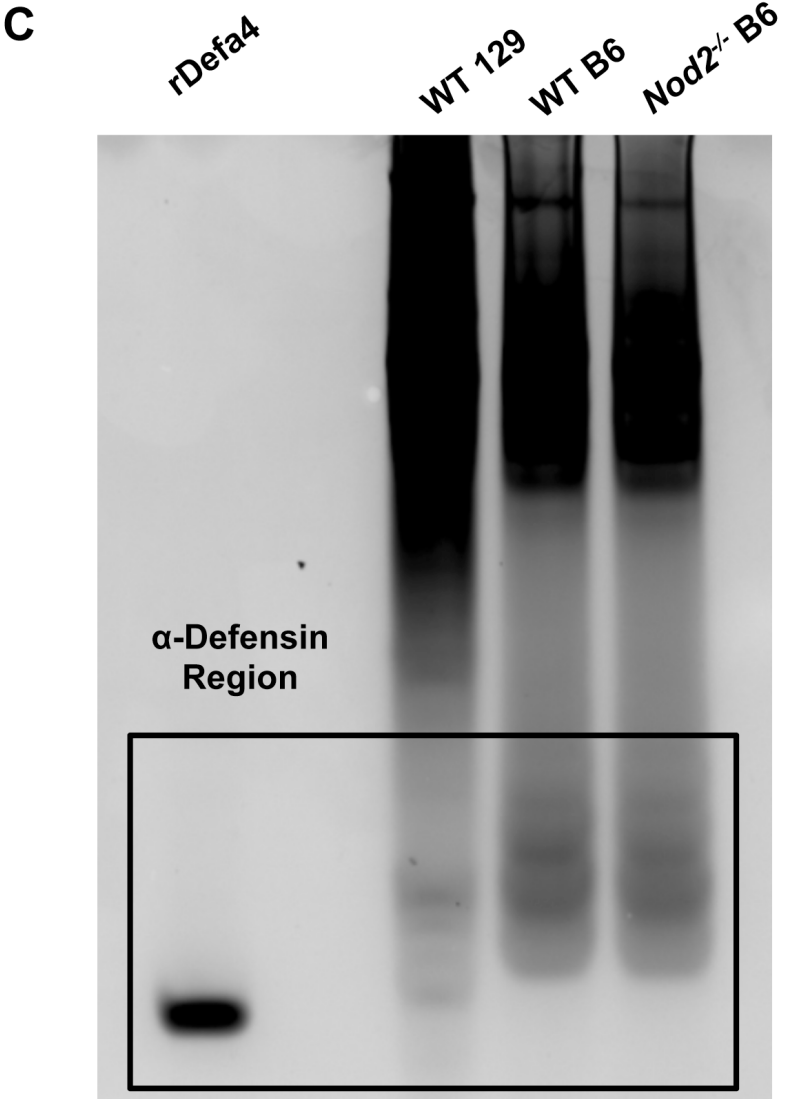

Supplement: gutjnl-2012-304190supp_figure4.pdf [file gutjnl-2012-304190supp_figure4.pdf]
